# Supplementary material for: Associations between Attention-Deficit Hyperactivity Disorder (ADHD) Treatment and Patient Nutritional Status and Height
Source: Behav Neurol. 2018 Oct 2;2018:7341529. doi: 10.1155/2018/7341529 (PMC6189682; doi:10.1155/2018/7341529)
Supplement: Supplementary Materials — The supplementary material submitted consists of the database and statistical analyses used to support the findings of the study, as oriented on the data sharing policy of the journal. [file 7341529.f1.xlsx]

## Sheet: RESULT 1st PHASE
		Real								Control group
			Control group	Study sample						Thinness	12	0.0207254
		Thinness	12	0	12					Normal weight	378	0.65285
		Normal weight	378	55	433					Overweight	99	0.170984
		Overweight	99	28	127					Obesity	90	0.15544
		Obesity	90	10	100
			579	93	672					Study sample
										Thinness	0	0
										Normal weight	55	0.591398
		Expected								Overweight	28	0.301075
			Control group	Study sample						Obesity	10	0.107527
		Thinness	10.3393	1.66071
		Normal weight	373.076	59.9241
		Overweight	109.424	17.5759
		Obesity	86.1607	13.8393
		Chi-squared:		0.0128064

## Sheet: TD CONTROL
	Randomly selected	1
	Age (class)	Between 5 and 13
	Contagem de ID	Gender
	BMI Class	F	M	Total Geral
	Thinness	1	6	7
	Normal weight	45	166	211
	Overweight	15	42	57
	Obesity	11	48	59
	Total Geral	72	262	334
	Randomly selected	1
	Age (class)	Between 5 and 13
	Contagem de ID	Gender
	BMI Class	F	M	Total Geral
	Thinness	0.0138889	0.0229008	0.0209581
	Normal weight	0.625	0.633588	0.631737
	Overweight	0.208333	0.160305	0.170659
	Obesity	0.152778	0.183206	0.176647
	Total Geral	1	1	1

## Sheet: DB CONTROL
ID	Patient	Name	Matrícula	Birth date	Evaluation date	Age (months)	Age (years)	Age (years)	Age (class)	Gender	Randomly selected	Random number	Reason	Comunidade	Cre/ Esc	Horas/dia	Clasificação	Peso CRI 1 (kg)	Peso CRI 2 (kg)	Peso CRI 3 (kg)	Weight (Kg)	Z Score Peso CRI	Acerto classifi 1	Estatura CRI 1	Estatura CRI 2	Estatura CRI 3	Height (cm)	Weight Z Score	Height Z Score	BMI	BMI Class	BMI Z Score
662	618	LTSS	764711	1995-10-22	2009-10-04	168	14	13.9507	Between 5 and 13	F	1	0.00576363	40	1	1	5	2	47.85	47.9	47.9	47.88			160.3	160.4	160.3	160.33		0.1	18.6	Normal weight	-0.36
692	718	RLC	127190	2001-11-15	2009-10-15	95	7	7.91667	Between 5 and 13	F	1	0.00711616	40	1	1	5	3	31.6	31.65	31.65	31.63			128.5	128.6	128.5	128.53	1.41	0.43	19.1	Overweight	1.56
540	291	SMS	15185	2000-11-01	2009-06-16	104	8	8.62443	Between 5 and 13	F	1	0.00802706	13	1	1	9	3	32.35	32.35	32.35	32.35			136	136.1	136	136.03	1.05	0.97	17.5	Normal weight	0.75
673	664	BVG	847014	1998-06-16	2009-10-08	136	11	11.3114	Between 5 and 13	F	1	0.00803336	12	1	1	5	3	45.1	45.15	45.1	45.12			156.5	156.5	156.6	156.53		1.42	18.4	Normal weight	0.39
470	21	RSD	773625B	1996-01-05	2009-04-25	160	13	13.3048	Between 5 and 13	F	1	0.0189348	35	3	1	5	3	39.9	39.95	40	39.95			160	160.1	160	160.03		0.35	15.6	Normal weight	-1.68
629	528	KSD	882695	2000-09-07	2009-08-27	108	9	8.97146	Between 5 and 13	F	1	0.0222871	6	1	1	5	5	29.9	29.9	29.95	29.92			128.3	128.3	128.3	128.3	0.37	-0.66	18.2	Normal weight	0.95
542	301	VBS	895791	2000-03-30	2009-06-21	111	9	9.22534	Between 5 and 13	F	1	0.0240375	40	1	1	4	2	26.25	26.2	26.2	26.22			127.7	127.7	127.8	127.73	-0.61	-0.99	16.1	Normal weight	-0.07
712	776	GSS	B165644	2003-12-02	2009-10-26	71	5	5.89909	Between 5 and 13	F	1	0.0258065	22	1	1	8	3	17.9	17.85	17.9	17.88			108.6	108.7	108.6	108.63	-0.76	-1.16	15.2	Normal weight	-0.07
785	980	BMX	2016465	2004-02-27	2010-01-21	71	5	5.90023	Between 5 and 13	F	1	0.0317059	10	1	1	8	6	28.25	28.3	28.3	28.28			117	117	117.2	117.07	2.16	0.5	20.6	Obesity	2.55
663	621	CFC	2018634	2002-12-12	2009-10-04	82	6	6.81142	Between 5 and 13	F	1	0.0332952	11	2	1	5	4	25.25	25.25	25.25	25.25			125.5	125.5	125.6	125.53	0.88	1.07	16	Normal weight	0.38
616	496	HAC	2104735	1997-05-29	2009-08-23	147	12	12.2336	Between 5 and 13	F	1	0.0347549	40	2	1	6	3	40.45	40.45	40.45	40.45			153.3	153.3	153.3	153.3		0.1	17.2	Normal weight	-0.43
756	891	MCE	E466370	1998-03-25	2009-11-22	140	11	11.6584	Between 5 and 13	F	1	0.0358431	6	3	1	5	4	54.25	54.2	54.25	54.23			156.1	156.1	156	156.07		1.01	22.3	Overweight	1.49
534	276	AFS	I445034	1999-05-19	2009-06-13	121	10	10.0669	Between 5 and 13	F	1	0.036027	11	1	1	4	1	24.3	24.3	24.3	24.3			133.5	133.5	133.4	133.47	-1.7	-0.87	13.6	Normal weight	-1.88
498	137	LGRSE	905612	2003-01-01	2009-05-23	77	6	6.39361	Between 5 and 13	F	1	0.0385507	35	1	1	5	1	19.85	19.85	19.85	19.85			122.3	122	122	122.1	-0.37	0.9	13.3	Normal weight	-1.45
588	435	LFL	H163947	2004-04-02	2009-08-16	65	5	5.37169	Between 5 and 13	F	1	0.0441013	40	1	1	4	6	18.25	18.2	18.25	18.23			109.5	109.4	109.4	109.43	-0.24	-0.4	15.2	Normal weight	-0.01
956	782	GSA		2004-10-15	2009-10-26	60	5	5.03014	Between 5 and 13	F	1	0.0477448	22	1	1	6	6	18.05	18.1	18.1	18.08			109.5	109.6	109.5	109.53	-0.02	-0.07	15.1	Normal weight	-0.14
488	98	GPS	C439934	1998-10-03	2009-05-02	127	10	10.5806	Between 5 and 13	F	1	0.0551875	29	1	1	5	4	45.8	45.8	45.85	45.82			143	143.1	143.1	143.07		0.12	22.4	Overweight	1.81
683	679	GMSR	D461253	2003-12-10	2009-10-11	70	5	5.83607	Between 5 and 13	F	1	0.0554901	12	1	1	9	4	35.2	35.2	35	35.13			121	121.1	121	121.03	3.44	1.35	24	Obesity	3.71
572	390	FMY	895630	2001-08-07	2009-08-04	96	8	7.99178	Between 5 and 13	F	1	0.0561394	12	2	1	5	3	22.6	22.6	22.6	22.6			119.9	119.9	119.9	119.9	-0.64	-1.14	15.7	Normal weight	0.02
507	170	BSC	904887	1998-09-23	2009-05-28	128	10	10.6804	Between 5 and 13	F	1	0.0606644	22	1	1	6	2	32.1	32.1	32.1	32.1			145.5	145.4	145.4	145.43		0.38	15.2	Normal weight	-0.99
564	363	CSL	I1531	2001-04-01	2009-07-04	99	8	8.25822	Between 5 and 13	F	1	0.0617335	40	1	1	4	4	38.95	38.95	38.95	38.95			137	137.1	137.1	137.07	2.25	1.53	20.7	Overweight	1.98
602	467	LFFM	C14278	1999-05-13	2009-08-18	123	10	10.2637	Between 5 and 13	F	1	0.0621737	10	1	1	5	3	39.1	39.1	39.1	39.1			147	147	147	147		1.03	18.1	Normal weight	0.58
643	572	LMS	D208638	2003-05-22	2009-09-04	76	6	6.28402	Between 5 and 13	F	1	0.0714042	40	1	1	4	3	22.05	22.1	22.1	22.08			114.1	114	114	114.03	0.4	-0.53	17	Normal weight	0.95
604	471	GM	F88311	1998-01-13	2009-08-18	139	11	11.597	Between 5 and 13	F	1	0.0727747	40	1	1	6	3	40	40.05	40.05	40.03			138.5	138.5	138.4	138.47		-1.52	20.9	Overweight	1.14
760	904	SGJB	113742	1997-03-04	2009-11-23	153	12	12.7187	Between 5 and 13	F	1	0.0732738	32	1	1	5	1	42.35	42.3	42.3	42.32			155.5	155.6	155.5	155.53		0.06	17.5	Normal weight	-0.47
581	416	CSL	116540	1998-04-05	2009-08-11	136	11	11.3498	Between 5 and 13	F	1	0.073613	12	1	1	5	3	47.4	47.4	47.45	47.42			148.5	148.6	148.6	148.57		0.2	21.5	Overweight	1.38
783	972	JPCGM	878119	2000-11-10	2009-12-10	109	9	9.08333	Between 5 and 13	F	1	0.075622	40	2	1	5	5	35.3	35.4	35.4	35.37			131.5	131.6	131.6	131.57	1.21	-0.23	20.4	Overweight	1.68
743	856	NPO	2004800	2003-05-11	2009-11-15	78	6	6.51096	Between 5 and 13	F	1	0.0775536	22	1	1	10	3	23.35	23.4	23.4	23.38			124.5	124.6	124.5	124.53	0.61	1.22	15.1	Normal weight	-0.16
720	798	INC	C463419	2000-02-06	2009-10-29	117	9	9.72968	Between 5 and 13	F	1	0.0901256	22	1	1	5	2	25.85	25.85	25.85	25.85			129.6	129.6	129.6	129.6	-1.08	-1.16	15.4	Normal weight	-0.58
768	923	MGSP	2066380	2002-06-26	2009-11-27	89	7	7.41941	Between 5 and 13	F	1	0.0918911	12	1	1	5	2	19.7	19.7	19.75	19.72			117.1	117.2	117.2	117.17	-1.14	-1.08	14.4	Normal weight	-0.73
499	140	SPRG	E410770	2003-11-03	2009-05-24	67	5	5.55753	Between 5 and 13	F	1	0.107397	40	1	1	4	2	18.4	18.4	18.4	18.4			115.5	115.5	115.4	115.47	-0.31	0.6	13.8	Normal weight	-1.05
630	530	LSS	E310229	1996-05-06	2009-08-27	160	13	13.3075	Between 5 and 13	F	1	0.107923	6	1	1	5	3	49.7	49.7	49.7	49.7			162.6	162.5	162.6	162.57		0.71	18.8	Normal weight	-0.09
736	835	CCM	891718	2000-12-16	2009-11-12	107	8	8.90571	Between 5 and 13	F	1	0.113475	38	1	1	6	3	31.05	31.1	31.1	31.08			130.7	130.7	130.6	130.67	0.63	-0.21	18.2	Normal weight	0.98
791	995	BGRB	F110245	2003-05-08	2009-11-11	78	6	6.50822	Between 5 and 13	F	1	0.127421	32	1	1	6	3	20.6	20.6	20.65	20.62			118.2	118.1	118.1	118.13	-0.2	0.01	14.8	Normal weight	-0.35
595	453	YCRL	864391	1999-10-24	2009-08-17	118	9	9.81416	Between 5 and 13	F	1	0.132637	40	1	1	5	4	36.95	36.95	36.95	36.95			140.8	140.8	140.9	140.83	0.95	0.53	18.6	Normal weight	0.91
536	280	YCSA	2105411	2003-07-11	2009-06-13	71	5	5.92215	Between 5 and 13	F	1	0.134692	22	1	0	0	4	18.55	18.55	18.55	18.55			111.5	111.4	111.5	111.47	-0.52	-0.63	14.9	Normal weight	-0.22
766	917	BBDL	G31590	2000-03-13	2009-11-25	117	9	9.69954	Between 5 and 13	F	1	0.136699	22	1	1	4	3	32.1	32.15	32.15	32.13			139	139.1	139	139.03	0.26	0.35	16.6	Normal weight	0.09
552	321	BCS	105356	1996-05-23	2009-06-23	157	13	13.0833	Between 5 and 13	F	1	0.145273	1	1	1	5	2	41.3	41.3	41.3	41.3			154.5	154.4	154.5	154.47		-0.33	17.3	Normal weight	-0.68
478	54	AMFA	2030342	2002-06-30	2009-04-27	82	6	6.82511	Between 5 and 13	F	1	0.147286	22	1	1	6	3	30.45	30.45	30.45	30.45			124	124	124	124	1.94	0.77	19.8	Obesity	2.04
742	853	MVSS	F191560	2004-10-26	2009-11-14	61	5	5.05046	Between 5 and 13	F	1	0.147377	1	1	1	4	6	20.15	20.2	20.15	20.17			113.5	113.5	113.6	113.53	0.63	0.79	15.6	Normal weight	0.24
789	993	PACR	2103465	2004-08-25	2009-11-05	62	5	5.19521	Between 5 and 13	F	1	0.15167	40	1	1	6	2	21.15	21.2	21.2	21.18			111.6	111.6	111.5	111.57	0.91	0.26	17	Overweight	1.07
575	396	BBM	B150279	1999-12-05	2009-08-07	116	9	9.67215	Between 5 and 13	F	1	0.152283	32	1	1	4	6	31.05	31.05	31.05	31.05			136.8	136.8	136.8	136.8	0.08	0.03	16.6	Normal weight	0.08
667	652	CBS	2036529	2003-01-31	2009-10-06	80	6	6.68151	Between 5 and 13	F	1	0.159511	35	1	1	6	4	35.15	35.15	35.2	35.17			116	115.7	115.8	115.83	2.8	-0.59	26.2	Obesity	4.01
519	219	ACMN	?	1995-08-07	2009-06-05	166	13	13.8279	Between 5 and 13	F	1	0.166638	11	1	1	5	3	47.85	47.85	47.85	47.85			163	163.1	163	163.03		0.53	18	Normal weight	-0.59
759	903	ASS	K437733	2001-02-12	2009-11-23	105	8	8.78014	Between 5 and 13	F	1	0.171982	1	1	1	5	4	42.45	42.5	42.5	42.48			132.5	132.5	132.6	132.53	2.32	0.23	24.2	Obesity	2.66
516	196	NSS	23051A	1999-07-17	2009-06-02	119	9	9.87557	Between 5 and 13	F	1	0.172884	12	1	1	4	4	34.1	34.05	34.1	34.08			137.7	137.8	137.7	137.73	0.47	-0.02	18	Normal weight	0.63
703	749	GSN	J462285	2000-06-16	2009-10-20	112	9	9.34429	Between 5 and 13	F	1	0.173487	35	1	1	6	4	41.2	41.25	41.25	41.23			137.5	137.5	137.6	137.53	1.81	0.47	21.8	Overweight	1.98
652	596	IGV	793634	1996-09-04	2009-09-29	157	13	13.0685	Between 5 and 13	F	1	0.179948	6	2	1	5	5	67.5	67.6	67.5	67.53			155	155.1	155.2	155.1		-0.22	28.1	Obesity	2.3
727	812	WRS	2025415	2002-09-27	2009-11-05	85	7	7.10639	Between 5 and 13	F	1	0.180199	40	1	1	6	4	36.55	36.55	36.6	36.57			123.5	123.4	123.5	123.47	2.71	0.37	24	Obesity	3.16
755	882	MGBL	H2634	2000-11-25	2009-11-21	108	9	8.98904	Between 5 and 13	F	1	0.180529	22	1	1	8	4	35.65	35.7	35.7	35.68			127.4	127.5	127.5	127.47	1.32	-0.81	22	Obesity	2.11
676	667	TSC	H180423	2004-03-30	2009-10-09	66	5	5.5258	Between 5 and 13	F	1	0.187037	6	1	0	0	6	20.25	20.3	20.3	20.28			106.3	106.3	106.2	106.27	0.38	-1.23	18	Overweight	1.52
707	759	CSG	109850	1997-03-04	2009-10-21	152	12	12.6299	Between 5 and 13	F	1	0.18944	22	1	1	5	1	38	38.05	38.05	38.03			157.4	157.4	157.4	157.4		0.39	15.4	Normal weight	-1.59
531	257	MCS	866557	1999-10-20	2009-06-12	116	9	9.64475	Between 5 and 13	F	1	0.190957	32	1	1	5	3	32.2	32.2	32.2	32.2			141.8	141.8	141.8	141.8	0.31	0.85	16	Normal weight	-0.21
634	545	LVF	E456038	2004-05-20	2009-08-30	63	5	5.2774	Between 5 and 13	F	1	0.194741	22	1	1	4	2	19.85	19.85	19.9	19.88			116.8	116.8	116.9	116.83	0.43	1.24	14.6	Normal weight	-0.47
647	584	JLS	817067	1997-09-12	2009-09-29	145	12	12.0466	Between 5 and 13	F	1	0.197324	22	1	1	4	3	27.35	27.35	27.3	27.33			138.9	138.9	138.7	138.83		-1.85	14.2	Thinness	-2.17
723	802	NOS	C106890	2003-01-06	2009-10-30	82	6	6.81575	Between 5 and 13	F	1	0.198018	35	1	1	8	3	24.4	24.4	24.45	24.42			119.3	119.3	119.4	119.33	0.68	-0.08	17.1	Normal weight	0.96
645	580	GLV	G374571	2000-05-04	2009-09-04	112	9	9.33333	Between 5 and 13	F	1	0.20056	12	1	1	5	2	29.15	29.2	29.2	29.18			135.8	135.9	135.9	135.87	-0.04	0.21	15.8	Normal weight	-0.24
571	388	LSA	821656	1995-10-25	2009-07-28	165	13	13.7582	Between 5 and 13	F	1	0.202959	22	2	1	5	5	112.95	112.9	112.9	112.92			173	173.2	173.1	173.1		2.01	37.7	Obesity	3.45
710	763	CPS	2026557	2003-01-07	2009-10-22	82	6	6.7911	Between 5 and 13	F	1	0.206427	35	1	1	6	2	19.05	19.05	19.05	19.05			112.3	112.2	112.2	112.23	-0.93	-1.37	15.1	Normal weight	-0.15
653	599	SAH	2042199	1996-06-25	2009-09-29	159	13	13.261	Between 5 and 13	F	1	0.213449	22	1	1	5	5	63.65	63.6	63.6	63.62			156.5	156.4	156.5	156.47		-0.14	26	Overweight	1.9
646	583	RLS		2004-03-12	2009-09-21	66	5	5.52466	Between 5 and 13	F	1	0.217665	22	1	1	6	3	25.3	25.3	25.35	25.32			115.5	115.6	115.6	115.57	1.78	0.65	19	Overweight	1.97
665	639	IOP	429592	2004-08-27	2009-10-05	61	5	5.10639	Between 5 and 13	F	1	0.218097	35	1	1	6	3	18.95	19	19	18.98			111.1	111.6	111.6	111.43	0.25	0.35	15.3	Normal weight	0.03
466	10	ACSS	E400484	2003-06-17	2009-04-25	70	5	5.85525	Between 5 and 13	F	1	0.223319	35	1	1	10	2	24	24.05	24	24.02			120	120.1	120.1	120.07	1.22	1.14	16.7	Normal weight	0.83
577	405	BSZ	2020294	2004-05-22	2009-08-10	63	5	5.21712	Between 5 and 13	F	1	0.223497	6	1	0	0	3	18.7	18.7	18.7	18.7			110.5	110.5	110.5	110.5	0.06	0.01	15.3	Normal weight	0.05
741	849	LCB	797802	1996-07-17	2009-11-13	160	13	13.3224	Between 5 and 13	F	1	0.226228	22	1	1	5	5	61.65	61.7	61.7	61.68			163.5	163.4	163.5	163.47		0.83	23.1	Overweight	1.25
532	259	KMS	849047	1998-12-28	2009-06-12	126	10	10.4562	Between 5 and 13	F	1	0.229489	40	1	1	5	3	42.25	42.25	42.25	42.25			148.5	148.6	148.5	148.53		1.08	19.2	Normal weight	0.92
546	307	TRS	2021813	2002-10-18	2009-06-22	80	6	6.67763	Between 5 and 13	F	1	0.233156	35	1	1	8	2	29.7	29.7	29.65	29.68			124.5	124.5	124.4	124.47	1.9	1.02	19.2	Overweight	1.84
633	543	CSAA	906982	2003-02-06	2009-07-28	78	6	6.47694	Between 5 and 13	F	1	0.248542	40	1	1	6	4	32.7	32.7	32.75	32.72			122.5	123	123	122.83	2.56	0.95	21.7	Obesity	2.73
735	834	LNS	2080651	2000-11-10	2009-11-12	108	9	9.00548	Between 5 and 13	F	1	0.254845	40	1	1	6	4	53.55	53.6	53.6	53.58			139	139.1	139	139.03	3.23	1.06	27.7	Obesity	3.23
729	818	ISL	29602	2000-02-04	2009-11-06	117	9	9.75548	Between 5 and 13	F	1	0.254943	40	2	1	6	4	36.65	36.7	36.7	36.68			136	136.1	136.1	136.07	0.95	-0.16	19.8	Overweight	1.32
695	728	MMM	821185	1997-04-21	2009-10-16	150	12	12.4863	Between 5 and 13	F	1	0.256745	10	1	1	5	3	38.7	38.75	38.75	38.73			149	148.9	148.9	148.93		-0.73	17.5	Normal weight	-0.4
788	988	LS	E455413	1999-02-15	2009-08-25	126	10	10.5274	Between 5 and 13	F	1	0.259083	20	1	1	4	3	30.05	30.05	30.05	30.05			136	136	136	136		-0.91	16.2	Normal weight	-0.34
693	719	GJB	G451548	1997-05-02	2009-10-15	150	12	12.4523	Between 5 and 13	F		0.262663	40	1	1	5	3	48.5	48.5	48.5	48.5			157.5	157.4	157.4	157.43		0.53	19.6	Normal weight	0.46
764	915	BMS	A99992	1999-08-01	2009-11-24	124	10	10.313	Between 5 and 13	F		0.265735	6	1	1	6	2	26.05	26.05	26.05	26.05			138.5	138.5	138.5	138.5		-0.33	13.6	Thinness	-2.01
529	254	LPL	2092578	2002-05-22	2009-06-10	85	7	7.05046	Between 5 and 13	F		0.267458	32	1	1	5	3	23.65	23.65	23.65	23.65			117	117.1	117	117.03	0.31	-0.74	17.3	Normal weight	0.98
556	333	GAP	K447396	2000-12-08	2009-06-30	103	8	8.56027	Between 5 and 13	F		0.272415	6	1	1	5	3	29.4	29.4	29.45	29.42			140.5	140.6	140.5	140.53	0.56	1.79	14.9	Normal weight	-0.59
570	381	LSV	I97503	2000-12-25	2009-07-09	103	8	8.5395	Between 5 and 13	F		0.277291	10	1	1	5	4	23.7	23.7	23.7	23.7			131.1	131.2	131.1	131.13	-0.74	0.24	13.8	Normal weight	-1.36
510	179	JSSA	K2737700	2001-07-28	2009-05-28	94	7	7.83333	Between 5 and 13	F		0.28495	10	1	1	4	2	23.35	23.35	23.3	23.33			126.5	126.4	126.4	126.43	-0.32	0.15	14.6	Normal weight	-0.64
505	163	CSOS	A442708	2002-03-17	2009-05-26	86	7	7.19132	Between 5 and 13	F		0.288646	11	1	1	5	3	25.95	25.95	25.95	25.95			126	125.9	125.9	125.93	0.79	0.73	16.4	Normal weight	0.51
691	710	LMS	2020550	2004-05-29	2009-10-15	65	5	5.37831	Between 5 and 13	F		0.288991	22	2	1	4	4	19.35	19.4	19.4	19.38			110.2	110.1	110.2	110.17	0.18	-0.26	16	Normal weight	0.46
490	104	ACRT	H125544	2001-07-02	2009-05-19	95	7	7.87991	Between 5 and 13	F		0.291964	40	1	1	6	6	34.7	34.8	34.8	34.77			129.5	130	129.5	129.67	1.94	0.66	20.7	Obesity	2.07
626	519	NOS	B47966	1999-08-05	2009-08-25	121	10	10.0548	Between 5 and 13	F		0.294426	6	1	1	5	3	37.5	37.5	37.45	37.48			141.5	141.5	141.4	141.47	0.9	0.39	18.7	Normal weight	0.88
730	819	GLSM	2047414	2002-06-17	2009-11-06	89	7	7.38653	Between 5 and 13	F		0.296712	22	1	1	5	3	21.4	21.4	21.45	21.42			116.5	116.6	116.5	116.53	-0.56	-1.16	15.8	Normal weight	0.16
524	236	MBS	B444590	2003-01-21	2009-06-06	77	6	6.37557	Between 5 and 13	F		0.298753	35	1	1	4	2	29.9	29.9	29.9	29.9			133.3	133.2	133.3	133.27	2.15	3.05	16.8	Normal weight	0.87
675	666	EFA	D17202	2001-05-12	2009-10-09	101	8	8.40845	Between 5 and 13	F		0.300605	40	1	1	4	3	28.75	28.8	28.8	28.78			134.2	134.3	134.2	134.23	0.54	0.89	16	Normal weight	0.07
554	328	NAA	B285309	1996-08-30	2009-06-26	154	12	12.8224	Between 5 and 13	F		0.303649	12	1	1	6	4	44.05	44.05	44.05	44.05			154	153.9	153.9	153.93		-0.24	18.6	Normal weight	-0.03
685	685	AMR	830966	1997-11-19	2009-10-11	143	11	11.8947	Between 5 and 13	F		0.304136	31	2	1	5	3	50.55	50.55	50.6	50.57			157.8	157.8	157.9	157.83		1.06	20.3	Normal weight	0.88
672	663	EFSP	2107274	1999-07-10	2009-10-08	123	10	10.2445	Between 5 and 13	F		0.306881	40	1	1	5	4	32.85	32.9	32.9	32.88			137.7	137.7	137.6	137.67		-0.39	17.3	Normal weight	0.27
520	221	ERC	884558	1998-08-13	2009-06-06	130	10	10.8142	Between 5 and 13	F		0.306984	40	1	1	5	4	30.4	30.4	30.4	30.4			139.9	140	140	139.97		-0.58	15.5	Normal weight	-0.83
489	100	NVMS	897577	2001-12-15	2009-05-19	89	7	7.42763	Between 5 and 13	F		0.311426	6	1	1	4	5	33.3	33.35	33.3	33.32			117.5	117.6	117.5	117.53	2.02	-1.02	24.1	Obesity	3.06
625	515	PHBS	795547	1996-10-29	2009-08-25	154	12	12.8224	Between 5 and 13	F		0.321414	14	2	1	5	4	52	52.1	52.1	52.07			146	146.1	146.1	146.07		-1.37	24.4	Overweight	1.68
621	508	LOK	I455231	2003-02-10	2009-08-24	78	6	6.53836	Between 5 and 13	F		0.324298	13	1	1	5	3	26.75	26.75	26.8	26.77			119.6	119.6	119.7	119.63	1.41	0.27	18.7	Overweight	1.69
573	394	ELG		2002-05-20	2009-08-07	87	7	7.21438	Between 5 and 13	F		0.327588	11	1	1	8	4	23.25	23.25	23.25	23.25			118	118.1	118	118.03	0.09	-0.72	16.7	Normal weight	0.68
593	446	JSO	H454212	2003-06-04	2009-08-16	74	6	6.19954	Between 5 and 13	F		0.32954	22	1	1	4	5	31.65	31.65	31.65	31.65			121.4	121.5	121.4	121.43	2.57	0.99	21.5	Obesity	2.74
714	784	KKMM	I237760	1997-01-13	2009-10-26	154	12	12.7856	Between 5 and 13	F		0.332896	35	1	1	5	3	40.3	40.3	40.35	40.32			160.3	160.3	160.2	160.27		0.7	15.7	Normal weight	-1.44
777	954	MMM	2040205	2002-11-20	2009-12-04	85	7	7.0395	Between 5 and 13	F		0.33378	40	1	1	9	2	18.25	18.3	18.3	18.28			112	112	112.1	112.03	-1.4	-1.64	14.6	Normal weight	-0.54
787	987	AVS	879334	2000-11-28	2009-08-28	105	8	8.75	Between 5 and 13	F		0.334873	39	1	1	8	3	30.65	30.7	30.7	30.68			139.4	139.5	139.4	139.43	0.67	1.4	15.8	Normal weight	-0.11
642	570	BAFM	881737	1999-06-15	2009-09-01	123	10	10.2116	Between 5 and 13	F		0.335608	6	1	1	5	3	38.25	38.25	38.25	38.25			126.4	126.5	126.5	126.47		-2.09	23.9	Obesity	2.23
603	470	LCAC	C454555	1996-07-19	2009-08-18	157	13	13.0806	Between 5 and 13	F		0.335915	12	1	1	4	4	50.45	50.45	50.45	50.45			159	159	159	159		0.33	20	Normal weight	0.4
512	188	TAS	125440	2001-11-26	2009-06-01	90	7	7.51484	Between 5 and 13	F		0.337018	6	1	1	9	4	28.85	28.85	28.85	28.85			118.5	118.4	118.4	118.43	1.18	-0.94	20.6	Obesity	2.13
619	506	ABS	84555	1996-02-28	2009-08-24	162	13	13.489	Between 5 and 13	F		0.337227	12	1	1	6	4	51.85	51.85	51.85	51.85			161	161	161	161		0.4	20	Normal weight	0.3
590	442	KMF	C282442	2001-08-25	2009-08-16	96	8	7.97534	Between 5 and 13	F		0.340025	40	1	1	5	2	31.4	31.45	31.4	31.42			137.5	137.6	137.6	137.57	1.34	1.93	16.6	Normal weight	0.49
530	256	GALI	?	1999-07-22	2009-06-12	119	9	9.88927	Between 5 and 13	F		0.343608	6	1	1	5	6	23.45	23.45	23.45	23.45			128.2	128.1	128.1	128.13	-1.86	-1.54	14.3	Normal weight	-1.34
526	249	ARN	2028390	2002-11-29	2009-06-09	78	6	6.52854	Between 5 and 13	F		0.346724	22	1	1	5	3	24.1	24.1	24.1	24.1			123.2	123.1	123.1	123.13	0.79	0.94	15.9	Normal weight	0.34
479	56	LNB	129474	2000-06-11	2009-04-27	107	8	8.87717	Between 5 and 13	F		0.354388	22	1	1	5	4	24.8	24.8	24.856	24.82			120	120.1	120	120.03	-0.7	-1.93	17.2	Normal weight	0.58
659	613	GMSO	2025931	1998-10-24	2009-10-02	131	10	10.9397	Between 5 and 13	F		0.356192	34	1	1	4	4	47	47	47	47			147.2	147.2	147.1	147.17		0.39	21.7	Overweight	1.55
511	186	NAVS	G443957	2001-08-20	2009-06-01	93	7	7.78128	Between 5 and 13	F		0.357324	35	1	1	5	3	25.15	25.15	25.15	25.15			123.2	123.3	123.2	123.23	0.19	-0.36	16.6	Normal weight	0.51
731	820	RCR	108232	1996-07-19	2009-11-06	160	13	13.2977	Between 5 and 13	F		0.360521	15	1	1	5	4	55.9	55.95	55.9	55.92			159.8	159.8	159.9	159.83		0.32	21.9	Normal weight	0.94
778	957	MAM	837384	1998-06-29	2009-12-04	137	11	11.4315	Between 5 and 13	F		0.361986	40	2	1	5	5	50.55	50.55	50.55	50.55			153	153.1	153	153.03		0.78	21.6	Overweight	1.38
658	608	MASO	A327613	1996-10-29	2009-10-02	155	12	12.926	Between 5 and 13	F		0.362288	13	1	1	5	4	40.3	40.3	40.35	40.32			146.9	146.8	146.9	146.87		-1.32	18.7	Normal weight	-0.02
679	673	KCMB	906788	2003-02-14	2009-10-09	80	6	6.65297	Between 5 and 13	F		0.365101	12	1	1	4	3	17.9	17.95	17.9	17.92			111	111	111	111	-1.27	-1.46	14.5	Normal weight	-0.52
473	41	PSA	X	1999-04-25	2009-04-26	120	10	10.0027	Between 5 and 13	F		0.365385	12	1	1	5	2	31.35	31.3	31.3	31.32			146	146.1	146.1	146.07	-0.1	1.16	14.7	Normal weight	-1.11
771	926	MCP	2035423	2001-02-16	2009-11-27	105	8	8.78014	Between 5 and 13	F		0.373383	38	1	1	5	3	22.3	22.3	22.3	22.3			121.1	121.1	121.1	121.1	-1.33	-1.66	15.2	Normal weight	-0.45
762	908	YMS	127173	2001-12-30	2009-11-23	95	7	7.89749	Between 5 and 13	F		0.374055	35	1	1	5	3	30.4	30.45	30.45	30.43			127.5	127.6	127.6	127.57	1.21	0.28	18.7	Overweight	1.41
566	371	MTS	2106735	2001-03-03	2009-07-04	100	8	8.33607	Between 5 and 13	F		0.374208	10	1	1	5	3	32.9	32.9	32.9	32.9			134.5	134.4	134.5	134.47	1.34	1.01	18.2	Overweight	1.11
680	674	RAMC	901831	1999-05-10	2009-10-09	125	10	10.4139	Between 5 and 13	F		0.377562	11	1	1	4	4	41.85	41.9	41.9	41.88			135.5	135.6	135.5	135.53		-0.88	22.8	Overweight	1.95
620	507	FCT	2027151	2000-03-21	2009-08-24	113	9	9.42489	Between 5 and 13	F		0.382143	25	1	1	5	3	39.45	39.45	39.5	39.47			136.6	136.6	136.65	136.62	1.54	0.25	21.1	Overweight	1.79
654	600	ASS	111051	1997-05-16	2009-09-29	149	12	12.3689	Between 5 and 13	F		0.387129	40	1	1	6	5	74	74.05	74	74.02			159.5	159.4	159.5	159.47		0.89	29.1	Obesity	2.59
605	473	YBC	13373	1999-04-01	2009-08-20	125	10	10.3854	Between 5 and 13	F		0.389053	40	1	1	5	3	32.05	32	32	32.02			137.5	137.6	137.5	137.53		-0.55	16.9	Normal weight	0.04
477	49	ACMD	X	2002-08-30	2009-04-27	80	6	6.65845	Between 5 and 13	F		0.391824	22	1	1	5	6	32.7	32.7	32.75	32.72			127	127.1	127.1	127.07	2.44	1.53	20.3	Obesity	2.24
648	586	BVS	20511	1997-09-17	2009-09-29	144	12	12.0329	Between 5 and 13	F		0.393774	6	2	1	5	3	61.9	61.9	61.95	61.92			160.5	160.5	160.5	160.5		1.33	24	Overweight	1.8
535	277	LAM	2066080	2002-07-17	2009-06-13	83	6	6.90571	Between 5 and 13	F		0.39935	40	1	1	5	3	26.3	26.3	26.3	26.3			124	124	124	124	1.06	0.68	17.1	Normal weight	0.93
559	346	MPG	2015075	2004-01-25	2009-07-02	65	5	5.43699	Between 5 and 13	F		0.399688	35	1	1	4	4	24.5	24.5	24.5	24.5			118.5	118.6	118.5	118.53	1.65	1.38	17.4	Overweight	1.28
497	133	FJS	2016363	2003-12-23	2009-05-23	65	5	5.41667	Between 5 and 13	F		0.420051	40	1	1	4	6	19.45	19.5	19.45	19.47			113.5	113.5	114	113.67	0.18	0.41	15.1	Normal weight	-0.12
687	688	CSSJ	856879	1998-08-08	2009-10-11	134	11	11.1749	Between 5 and 13	F		0.420602	22	1	1	5	3	47.35	47.4	47.4	47.38			154	154.1	154.1	154.07		1.19	20	Normal weight	0.98
758	899	LCOS	K303894	1999-09-18	2009-11-22	122	10	10.1776	Between 5 and 13	F		0.422804	35	1	1	4	3	39	39	39	39			149.3	149.3	149.4	149.33		1.49	17.5	Normal weight	0.35
538	282	CCSS	K445573	2003-04-01	2009-06-16	75	6	6.20776	Between 5 and 13	F		0.424012	40	1	1	4	6	15.8	15.85	15.8	15.82			104	104.1	104	104.03	-1.88	-2.37	14.6	Normal weight	-0.45
715	789	SÃO	I129844	2003-07-15	2009-10-26	75	6	6.28014	Between 5 and 13	F		0.427611	22	1	1	4	2	19.25	19.3	19.3	19.28			115.3	115.2	115.3	115.27	-0.5	-0.28	14.5	Normal weight	-0.52
713	781	JNRS	116457	1998-04-02	2009-10-26	139	11	11.5658	Between 5 and 13	F		0.428932	34	1	1	5	4	69.35	69.4	69.4	69.38			154.8	154.8	154.9	154.83		0.92	28.9	Obesity	2.73
632	540	FLS	H455093	1996-01-16	2009-08-28	163	13	13.6162	Between 5 and 13	F		0.43215	32	1	1	5	4	49.35	49.35	49.4	49.37			160	160.1	160.1	160.07		0.2	19.3	Normal weight	0
834	162	TOS	2020134	2004-05-19	2009-05-26	60	5	5.01918	Between 5 and 13	F		0.432965	40	1	1	5	2	18.25	18.25	18.25	18.25			107.5	107.6	107.5	107.53	-0.42	0	15.8	Normal weight	0.33
728	816	MCVA	E464234	2004-05-02	2009-11-06	66	5	5.51096	Between 5 and 13	F		0.436354	6	1	1	4	4	27.95	27.95	28	27.97			117.5	117.6	117.6	117.57	2.37	1.07	20.2	Obesity	2.49
721	799	GF	E463399	2003-08-31	2009-10-29	74	6	6.16119	Between 5 and 13	F		0.440925	38	1	1	9	3	20.1	20.1	20.1	20.1			114.4	114.3	114.4	114.37	-0.13	-0.33	15.4	Normal weight	0.05
708	760	LNL	112447	1996-01-06	2009-10-21	166	13	13.7911	Between 5 and 13	F		0.443418	35	2	1	5	1	43.6	43.6	43.65	43.62			164.5	164.5	164.5	164.5		0.76	16.1	Normal weight	-1.53
597	458	LAM	19011	1999-06-11	2009-08-18	122	10	10.1858	Between 5 and 13	F		0.443933	32	1	1	5	3	43.45	43.35	43.4	43.4			151.3	151.3	151.2	151.27		1.78	19	Normal weight	0.93
682	676	LSC	2009855	2003-09-05	2009-10-11	73	6	6.09977	Between 5 and 13	F		0.444628	22	1	1	4	6	18.1	18.15	18.15	18.13			113.5	113.6	113.5	113.53	-0.8	-0.42	14.1	Normal weight	-0.84
649	592	MHPCS	2105024	2004-01-08	2009-09-29	69	5	5.7242	Between 5 and 13	F		0.444852	10	1	1	9	3	16.6	16.65	16.65	16.63			109	109.2	109.2	109.13	-1.16	-0.87	14	Normal weight	-0.92
474	45	LRS	H110268	1997-05-18	2009-04-26	143	11	11.9386	Between 5 and 13	F		0.446815	34	1	1	5	3	39.4	39.4	39.45	39.42			154.5	154.5	154.6	154.53		0.53	16.5	Normal weight	-0.68
666	640	MAS	F460562	2003-03-11	2009-10-05	79	6	6.56689	Between 5 and 13	F		0.448837	40	3	1	5	3	22.05	22.1	22.1	22.08			116.3	116.3	116.5	116.37	0.21	-0.38	16.3	Normal weight	0.57
580	415	VLSS	G453549	1999-06-21	2009-08-11	122	10	10.1393	Between 5 and 13	F		0.448982	40	1	1	5	3	26.9	26.9	26.9	26.9			131.5	131.6	131.5	131.53		-1.24	15.5	Normal weight	-0.61
606	475	RAO	E141412	2003-04-29	2009-08-20	76	6	6.30868	Between 5 and 13	F		0.45437	25	3	1	12	5	30.4	30.4	30.4	30.4			118.1	118	118	118.03	2.28	0.22	21.8	Obesity	2.82
651	595	GSC	2015719	2001-07-31	2009-09-29	98	8	8.16119	Between 5 and 13	F		0.455404	40	1	1	4	5	41.65	41.7	41.65	41.67			133	133.2	133.1	133.1	2.63	0.95	23.5	Obesity	2.7
725	808	AMFA	2030342	2002-05-30	2009-11-04	89	7	7.42877	Between 5 and 13	F		0.457443	40	1	1	5	3	31.05	31	31	31.02			124.5	124.3	124.4	124.4	1.64	0.2	20	Overweight	1.98
576	403	DOS	J165679	1996-09-15	2009-08-10	155	12	12.903	Between 5 and 13	F		0.458493	10	1	1	5	2	35.4	35.4	35.5	35.43			147.5	147.6	147.5	147.53		-1.21	16.3	Normal weight	-1.15
722	801	AJOC	D391310	2003-03-10	2009-10-30	80	6	6.63813	Between 5 and 13	F		0.463132	40	1	1	5	3	23.4	23.45	23.45	23.43			114.1	114	114	114.03	0.54	-0.89	18	Overweight	1.39
769	924	CVLS	I97909	2002-10-01	2009-11-27	86	7	7.15457	Between 5 and 13	F		0.466131	35	1	1	5	1	19.25	19.3	19.3	19.28			118	118	118.1	118.03	-1.11	-0.67	13.8	Normal weight	-1.08
623	513	CPS	783334	1996-01-16	2009-08-25	163	13	13.608	Between 5 and 13	F		0.471088	40	2	1	6	4	59.9	59.95	59.95	59.93			157	157	157	157		-0.24	24.3	Overweight	1.48
754	880	ADP	2031366	2003-10-10	2009-11-21	73	6	6.11347	Between 5 and 13	F		0.480748	35	1	1	6	6	30.65	30.7	30.7	30.68			118.1	118.1	118.2	118.13	2.46	0.45	22	Obesity	2.92
618	503	GCS	A121150	2003-05-31	2009-08-24	75	6	6.23082	Between 5 and 13	F		0.481228	34	1	1	10	3	30.5	30.5	30.5	30.5			126	126	126.1	126.03	2.35	1.84	19.2	Overweight	1.95
569	380	NGB	J10732	2000-10-04	2009-07-09	105	8	8.7637	Between 5 and 13	F		0.486298	10	1	1	5	1	22.8	22.8	22.8	22.8			132.5	132.5	132.4	132.47	-1.17	0.23	13	Thinness	-2.07
521	223	MLM	2003149	2003-01-21	2009-06-06	77	6	6.37557	Between 5 and 13	F		0.493927	22	1	1	4	3	17.15	17.15	17.15	17.15			107.9	108	107.9	107.93	-1.39	-1.78	14.7	Normal weight	-0.38
502	155	KRS	F141251	2003-08-28	2009-05-25	69	5	5.74178	Between 5 and 13	F		0.495023	6	1	1	6	4	20.95	20.95	20.95	20.95			120.1	120.1	120.1	120.1	0.44	1.29	14.5	Normal weight	-0.5
734	833	AABS	2058731	2001-08-25	2009-11-09	99	8	8.20616	Between 5 and 13	F		0.495601	22	1	1	4	4	34.15	34.2	34.2	34.18			135.5	135.3	135.4	135.4	1.63	1.3	18.6	Overweight	1.31
614	491	GOP	124372	2001-06-21	2009-08-21	98	8	8.16667	Between 5 and 13	F		0.496978	11	1	1	5	3	25	25	25	25			119	119	119	119	-0.13	-1.46	17.7	Normal weight	0.93
555	330	NCS	K446821	2001-07-06	2009-06-26	96	8	7.97146	Between 5 and 13	F		0.497796	22	1	1	5	5	36.1	36.1	36	36.07			136	136.1	136	136.03	2.06	1.66	19.5	Overweight	1.67
701	742	LBM	B462179	2003-07-09	2009-10-19	75	6	6.2774	Between 5 and 13	F		0.502776	10	1	1	8	3	29.6	29.65	29.65	29.63			119.5	119.5	119.5	119.5	2.16	0.53	20.7	Obesity	2.49
957	786	GFLL	2043686	2004-10-16	2009-10-26	60	5	5.0274	Between 5 and 13	F		0.503298	9	1	0	0	99	16.9	16.95	16.95	16.93			103.5	103.3	103.4	103.4	-1.3	-0.52	15.8	Normal weight	0.36
537	281	RAB	E257812	2003-04-05	2009-06-13	74	6	6.18858	Between 5 and 13	F		0.51262	6	1	1	4	4	22.1	22.05	22.05	22.07			114.4	114.5	114.5	114.47	0.46	-0.34	16.8	Normal weight	0.89
732	823	NBC	129568	2002-04-13	2009-11-09	91	7	7.57237	Between 5 and 13	F		0.514773	22	1	1	5	2	27.5	27.5	27.55	27.52			123.5	123.4	123.5	123.47	0.87	-0.11	18.1	Overweight	1.22
500	146	AJMS	2075244	2002-01-30	2009-05-24	88	7	7.31689	Between 5 and 13	F		0.521944	11	2	1	6	3	23.75	23.75	23.75	23.75			126.8	126.8	127	126.87	0.16	0.77	14.8	Normal weight	-0.45
750	871	CSS	410487	1997-09-26	2009-11-17	146	12	12.142	Between 5 and 13	F		0.527985	22	1	1	5	4	60.65	60.65	60.7	60.67			159.5	159.6	159.5	159.53		1.09	23.8	Overweight	1.73
775	940	AST	858277	1999-06-05	2009-12-03	126	10	10.4945	Between 5 and 13	F		0.530428	22	1	1	4	1	33.85	33.9	33.9	33.88			148.8	148.85	148.85	148.83		1.08	15.3	Normal weight	-0.86
547	308	DML	A225829	1998-03-31	2009-06-22	135	11	11.2253	Between 5 and 13	F		0.530786	40	1	1	5	3	44.9	44.9	44.95	44.92			144.7	144.6	144.7	144.67		-0.27	21.5	Overweight	1.41
631	533	SSP	900273	2002-02-16	2009-08-27	90	7	7.53014	Between 5 and 13	F		0.531908	40	1	1	4	4	28.25	28.25	28.25	28.25			126.3	126.3	126.3	126.3	1.05	0.44	17.7	Overweight	1.09
726	809	CRS	832726	1998-02-23	2009-11-04	140	11	11.6979	Between 5 and 13	F		0.532898	12	1	1	5	3	47.9	47.95	47.95	47.93			159.5	159.4	159.4	159.43		1.48	18.9	Normal weight	0.44
585	428	BMLC	2081400	2002-12-28	2009-08-13	80	6	6.62557	Between 5 and 13	F		0.533071	35	2	1	5	3	25.4	25.4	25.4	25.4			126.5	126.5	126.5	126.5	1.04	1.46	15.9	Normal weight	0.32
747	863	LBSJ	755883	1999-06-08	2009-11-16	125	10	10.4386	Between 5 and 13	F		0.53535	15	1	1	5	3	27.2	27.25	27.2	27.22			130	130.1	130	130.03		-1.75	16.1	Normal weight	-0.39
567	374	HTSP	829263	1996-08-06	2009-07-07	155	12	12.9194	Between 5 and 13	F		0.539679	40	1	1	5	1	32.9	32.95	32.95	32.93			149.5	149.6	149.5	149.53		-0.93	14.7	Thinness	-2.11
639	560	LBS	D53821	1999-08-14	2009-08-30	121	10	10.0438	Between 5 and 13	F		0.540352	34	1	1	5	3	31.45	31.5	31.5	31.48			139.4	139.5	139.5	139.47	-0.07	0.09	16.2	Normal weight	-0.23
696	730	NASR	J39794	2000-10-26	2009-10-16	108	9	8.9726	Between 5 and 13	F		0.541409	40	1	1	6	2	25.2	25.25	25.2	25.22			132.5	132.6	132.5	132.53	-0.67	0.03	14.4	Normal weight	-1.05
773	933	MJC	203617	2001-01-06	2009-11-30	107	8	8.89909	Between 5 and 13	F		0.55077	6	1	1	5	3	29.15	29.2	29.2	29.18			138.5	138.5	138.6	138.53	0.27	1.09	15.2	Normal weight	-0.48
484	84	COS	H168143	1996-12-07	2009-04-28	149	12	12.3909	Between 5 and 13	F		0.560537	6	1	1	5	5	88.25	88.25	88.25	88.25			172	172	172.2	172.07		2.71	29.8	Obesity	2.68
694	727	NSN	2024077	2004-06-28	2009-10-16	64	5	5.30046	Between 5 and 13	F		0.561225	40	1	1	6	6	19.2	19.2	19.25	19.22			111.5	111.6	111.5	111.53	0.18	0.12	15.5	Normal weight	0.14
751	874	NAP	F167253	1998-11-05	2009-11-18	133	11	11.0356	Between 5 and 13	F		0.564628	12	1	1	6	1	22.65	22.7	22.7	22.68			125.3	125.3	125.4	125.33		-2.99	14.4	Normal weight	-1.6
601	466	LVJA	A129371	1999-02-20	2009-08-18	126	10	10.4945	Between 5 and 13	F		0.571399	32	1	1	5	4	39.2	39.2	39.2	39.2			142.5	142.5	142.5	142.5		0.12	19.3	Normal weight	0.96
660	614	DMS	2020609	2004-05-31	2009-10-04	64	5	5.34269	Between 5 and 13	F		0.572857	6	1	1	5	6	17.45	17.5	17.45	17.47			105	104.9	105	104.97	-0.52	-1.28	15.9	Normal weight	0.39
782	964	MGSP	2018426	2004-04-13	2009-12-05	68	5	5.64475	Between 5 and 13	F		0.575989	40	1	1	4	3	17.95	18	18	17.98			108.8	108.9	108.8	108.83	-0.54	-0.85	15.2	Normal weight	-0.05
480	58	BPF	28357B	2000-11-18	2009-04-27	101	8	8.44132	Between 5 and 13	F		0.576365	6	1	1	5	3	27.4	27.45	27.45	27.43			129	129.1	129.1	129.07	0.24	-0.01	16.5	Normal weight	0.32
740	848	JRN	2006569	2003-06-18	2009-11-13	77	6	6.40297	Between 5 and 13	F		0.581267	35	1	1	4	4	31.45	31.5	31.5	31.48			131.5	131.4	131.5	131.47	2.4	2.66	18.2	Overweight	1.51
779	958	DSS	B53606	1998-07-13	2009-12-05	137	11	11.3947	Between 5 and 13	F		0.582941	12	1	1	5	5	51.5	51.55	51.55	51.53			142.5	142.5	142.4	142.47		-0.75	25.4	Obesity	2.22
656	604	MGCL	23469	1996-11-18	2009-10-01	155	12	12.8701	Between 5 and 13	F		0.583226	1	2	1	4	3	29.85	29.85	29.85	29.85			135.9	136	136	135.97		-2.86	16.1	Normal weight	-1.21
757	893	ADS	2020254	2002-10-07	2009-11-22	86	7	7.12443	Between 5 and 13	F		0.590636	40	1	1	6	2	24.75	24.8	24.75	24.77			116.8	116.9	116.8	116.83	0.55	-0.85	18.1	Overweight	1.35
635	547	YSS	J118619	2003-05-01	2009-08-30	76	6	6.32945	Between 5 and 13	F		0.593433	34	1	1	5	5	27.3	27.25	27.3	27.28			120	120	120	120	1.66	0.57	18.9	Overweight	1.83
702	743	EPTS	C462185	2003-06-08	2009-10-19	76	6	6.36347	Between 5 and 13	F		0.595548	1	1	1	7	4	41.7	41.7	41.75	41.72			123.2	123.2	123.2	123.2	4.1	1.14	27.5	Obesity	4.6
664	633	BRP	2018523	2003-12-21	2009-10-05	70	5	5.7895	Between 5 and 13	F		0.596679	40	1	1	6	2	20.75	20.75	20.75	20.75			124.1	124.1	124.2	124.13	0.34	2.03	13.5	Normal weight	-1.32
550	316	MLR	125846	2001-12-11	2009-06-23	90	7	7.53288	Between 5 and 13	F		0.601041	13	1	1	4	6	23.85	23.85	23.85	23.85			115	115.1	115	115.03	0.03	-1.56	18	Overweight	1.22
770	925	TCS	A99978	2002-07-01	2009-11-27	89	7	7.40457	Between 5 and 13	F		0.609994	17	1	1	5	2	19.8	19.8	19.8	19.8			118	118	118	118	-1.11	-0.92	14.2	Normal weight	-0.83
548	311	VOSC	B108999	2003-06-03	2009-06-22	73	6	6.05205	Between 5 and 13	F		0.613055	22	1	1	6	3	24	24	24	24			116	115.9	115.9	115.93	1.08	0.1	17.9	Overweight	1.41
609	479	ETS	2012895	2003-11-23	2009-08-20	69	5	5.74178	Between 5 and 13	F		0.614212	32	1	1	4	1	20.8	20.8	20.85	20.82			114	113.8	114	113.93	0.39	0.06	16	Normal weight	0.49
699	736	ACHS	K461652	2004-02-29	2009-10-18	68	5	5.63653	Between 5 and 13	F		0.615108	22	1	1	4	3	20.65	20.7	20.7	20.68			116	116.1	116.1	116.07	0.43	0.62	15.4	Normal weight	0.06
568	376	SLS	2048823	1998-09-29	2009-07-07	129	10	10.7731	Between 5 and 13	F		0.621006	40	1	1	5	3	31.55	31.5	31.55	31.53			145.5	145.5	145.6	145.53		0.3	14.9	Normal weight	-1.21
669	658	IPA	903271	2002-10-02	2009-10-08	84	7	7.01644	Between 5 and 13	F		0.621961	6	1	1	4	3	30	30	29.95	29.98			129	129.1	129.1	129.07	1.73	1.49	18	Overweight	1.31
765	916	SCR	832586	1998-02-27	2009-11-25	141	11	11.7445	Between 5 and 13	F		0.622351	10	1	1	5	5	60.5	60.5	60.45	60.48			155.6	155.5	155.6	155.57		0.87	25	Obesity	2.07
671	661	IAAB	2067278	2002-10-01	2009-10-08	84	7	7.01918	Between 5 and 13	F		0.623989	40	1	1	4	6	23.05	23	23.05	23.03			122.5	122.4	122.4	122.43	0.17	0.28	15.4	Normal weight	-0.03
641	568	GAPI	20369	1999-07-22	2009-09-01	121	10	10.1091	Between 5 and 13	F		0.626286	40	2	1	5	3	25.15	25.1	25.1	25.12			129.5	129.6	129.6	129.57		-1.52	15	Normal weight	-0.95
553	323	TSC	J421388	2001-03-26	2009-06-26	99	8	8.25	Between 5 and 13	F		0.633731	28	1	1	4	3	24.8	24.85	24.8	24.82			125	125.1	125	125.03	-0.23	-0.51	15.9	Normal weight	0.06
719	797	PSJ	847171	1998-09-09	2009-10-29	134	11	11.1381	Between 5 and 13	F		0.634414	39	1	1	6	4	44.7	44.7	44.75	44.72			155.5	155.5	155.6	155.53		1.45	18.5	Normal weight	0.48
749	868	MFCS	H324635	2004-06-12	2009-11-16	65	5	5.42763	Between 5 and 13	F		0.637593	6	1	1	10	2	20.4	20.45	20.4	20.42			109	109.1	109	109.03	0.49	-0.55	17.2	Overweight	1.14
515	195	JSO	K444076	1999-11-16	2009-06-02	115	9	9.54498	Between 5 and 13	F		0.638017	11	1	1	5	2	29	29	29	29			139.4	139.4	139.5	139.43	-0.23	0.58	14.9	Normal weight	-0.82
525	237	IBVMSN	2105125	2002-06-28	2009-06-06	83	6	6.93973	Between 5 and 13	F		0.643152	22	1	1	5	4	25.8	25.8	25.8	25.8			127	126.8	126.8	126.87	0.92	1.17	16	Normal weight	0.37
761	907	MDV	908329	2002-09-12	2009-11-23	86	7	7.1968	Between 5 and 13	F		0.651136	22	1	1	5	3	24.4	24.45	24.45	24.43			121.3	121.3	121.2	121.27	0.42	-0.12	16.6	Normal weight	0.64
784	977	ECDC	889139	2000-11-10	2009-12-14	109	9	9.09429	Between 5 and 13	F		0.651321	35	1	1	5	5	46.45	46.45	46.5	46.47			146	146.1	146	146.03	2.53	2.11	21.8	Obesity	2.05
491	106	DDA	53089	1998-10-19	2009-05-19	127	10	10.5833	Between 5 and 13	F		0.65466	10	1	1	4	5	61.7	61.75	61.75	61.73			153.5	153.4	153.5	153.47		1.7	26.2	Obesity	2.55
506	165	MNM	2020205	2002-11-20	2009-05-26	78	6	6.51644	Between 5 and 13	F		0.65473	22	1	1	5	3	18.35	18.35	18.35	18.35			109.5	109.4	109.4	109.43	-1	-1.63	15.3	Normal weight	0
563	361	ISS	2084137	2002-05-23	2009-07-04	85	7	7.11461	Between 5 and 13	F		0.65961	1	1	1	4	3	25.35	25.35	25.35	25.35			126.6	126.6	126.6	126.6	0.7	0.93	15.8	Normal weight	0.23
543	302	AAOL	D32957	1997-02-16	2009-06-21	148	12	12.347	Between 5 and 13	F		0.660036	40	1	1	4	1	28.05	28.05	28.05	28.05			146.3	146.4	146.4	146.37		-0.99	13.1	Thinness	-3.17
700	738	EAS	825224	1998-02-13	2009-10-18	140	11	11.6804	Between 5 and 13	F		0.662049	34	1	1	5	2	26.45	26.5	26.5	26.48			131.8	131.9	131.8	131.83		-2.57	15.2	Normal weight	-1.31
483	82	CBN	I405584	2001-08-30	2009-04-28	92	7	7.66119	Between 5 and 13	F		0.662702	22	1	1	5	3	21.3	21.35	21.35	21.33			119	119.1	119.1	119.07	-0.78	-0.97	15	Normal weight	-0.32
494	123	YVJS	2094619	2003-10-30	2009-05-22	67	5	5.56142	Between 5 and 13	F		0.66429	22	1	0	0	4	18.55	18.55	18.5	18.53			110.1	110.2	110.1	110.13	-0.26	-0.49	15.3	Normal weight	0.02
628	527	PPS	886988	2000-02-07	2009-08-25	115	9	9.54932	Between 5 and 13	F		0.669432	12	1	1	4	3	29.95	29.95	29.9	29.93			135	135.1	135	135.03	-0.04	-0.13	16.4	Normal weight	0.02
482	79	ICCP	2010282	2003-09-15	2009-04-28	67	5	5.61895	Between 5 and 13	F		0.66973	22	1	1	4	3	17	17.05	17.05	17.03			108	108.1	108.1	108.07	-0.91	-0.97	14.6	Normal weight	-0.46
495	126	RZP	F427085	2000-03-10	2009-05-22	110	9	9.19954	Between 5 and 13	F		0.67498	22	1	1	4	6	22.65	22.65	22.65	22.65			122.2	122.2	122.2	122.2	-1.55	-1.86	15.2	Normal weight	-0.58
464	1	NAF	D115924	2003-03-10	2009-04-24	74	6	6.12169	Between 5 and 13	F		0.675783	10	1	1	8	3	21	21.05	21	21.02			119	119.1	119.1	119.07	0.19	0.63	14.8	Normal weight	-0.3
565	370	KCS	2014570	2004-01-12	2009-07-04	66	5	5.47808	Between 5 and 13	F		0.676208	40	1	1	4	6	20.9	20.9	20.9	20.9			114.5	114.5	114.4	114.47	0.61	0.5	16	Normal weight	0.45
492	116	ESLA	H272117	2004-01-29	2009-05-22	64	5	5.31416	Between 5 and 13	F		0.676696	22	1	1	6	6	16.35	16.3	16.35	16.33			107.5	107.5	108	107.67	-0.98	-0.69	14.1	Normal weight	-0.83
591	443	DCTS	K114712	2002-02-26	2009-08-16	90	7	7.4726	Between 5 and 13	F		0.679808	32	1	0	0	3	20.65	20.65	20.6	20.63			122.3	122.3	122.3	122.3	-0.87	-0.21	13.8	Normal weight	-1.16
748	865	CRSS	2003084	2003-03-31	2009-11-16	80	6	6.62557	Between 5 and 13	F		0.682026	32	1	1	6	6	19.05	19.1	19.1	19.08			109.8	109.9	109.8	109.83	-0.81	-1.66	15.8	Normal weight	0.29
689	699	RAO	2108524	2003-04-29	2009-10-13	78	6	6.45616	Between 5 and 13	F		0.689322	6	1	1	8	4	30.5	30.45	30.5	30.48			121	121.1	121.1	121.07	2.19	0.63	20.8	Obesity	2.46
684	681	MRS	E125668	1998-10-15	2009-10-11	132	11	10.989	Between 5 and 13	F		0.69318	22	2	1	6	3	32.65	32.65	32.7	32.67			140	140.1	140.1	140.07		-0.73	16.7	Normal weight	-0.28
592	445	IFB	117923	1998-06-20	2009-08-16	134	11	11.1557	Between 5 and 13	F		0.69383	10	1	1	5	2	27.35	27.35	27.35	27.35			134.5	134.5	134.4	134.47		-1.73	15.1	Normal weight	-1.19
481	78	YOA	691311	1998-05-05	2009-04-28	132	11	10.9797	Between 5 and 13	F		0.696995	22	1	1	6	3	34.4	34.35	34.4	34.38			140	140.1	140.1	140.07		-0.72	17.5	Normal weight	0.13
582	418	ACNS	2104687	2002-12-26	2009-08-11	80	6	6.62557	Between 5 and 13	F		0.70102	40	1	1	9	2	23.2	23.2	23.2	23.2			118.5	118.6	118.5	118.53	0.49	-0.03	16.5	Normal weight	0.67
612	484	RAS	E160587	1999-04-17	2009-08-20	124	10	10.3416	Between 5 and 13	F		0.706001	6	1	1	5	5	40.05	40.05	40.05	40.05			148.5	148.6	148.5	148.53		1.19	18.2	Normal weight	0.58
709	761	ASS	824688	1998-02-16	2009-10-21	140	11	11.6804	Between 5 and 13	F		0.706417	12	1	1	5	4	45.75	45.8	45.8	45.78			155.4	155.4	155.5	155.43		0.91	18.9	Normal weight	0.48
513	189	JSB	891353	2000-04-28	2009-06-01	109	9	9.09269	Between 5 and 13	F		0.707945	12	1	1	6	2	26.5	26.5	26.5	26.5			129.3	129.3	129.2	129.27	-0.45	-0.62	15.9	Normal weight	-0.15
518	218	IFC	853122	1996-06-19	2009-06-05	156	13	12.9616	Between 5 and 13	F		0.707947	22	1	1	5	3	52	52	52	52			164.7	164.7	164.6	164.67		1.22	19.2	Normal weight	0.16
780	960	AGS	J39538	2002-02-17	2009-12-05	94	7	7.80046	Between 5 and 13	F		0.718884	22	1	1	5	2	22.9	22.95	22.95	22.93			124.5	124.5	124.5	124.5	-0.41	-0.15	14.8	Normal weight	-0.5
586	430	GBS	2057309	2001-09-05	2009-08-13	95	7	7.93858	Between 5 and 13	F		0.722152	35	1	1	5	4	36	36.05	36.05	36.03			132.5	132.4	132.5	132.47	2.08	1.09	20.5	Obesity	2.01
668	657	LFC	C232992	2004-08-25	2009-10-08	61	5	5.12009	Between 5 and 13	F		0.725133	10	1	1	8	6	19.4	19.4	19.45	19.42			112.8	112.9	112.8	112.83	0.4	0.63	15.3	Normal weight	0.01
558	337	PMS	807346	1997-02-11	2009-06-30	149	12	12.3854	Between 5 and 13	F		0.727736	12	1	1	5	3	52.65	52.65	52.65	52.65			168	168	168.1	168.03		2.13	18.6	Normal weight	0.14
472	28	LEM	F152447	1997-11-02	2009-04-25	138	11	11.4797	Between 5 and 13	F		0.73713	40	3	1	5	3	43.7	43.7	43.75	43.72			149	149	149	149		0.14	19.7	Normal weight	0.81
578	408	JHSG	2024254	2002-12-02	2009-08-10	80	6	6.68858	Between 5 and 13	F		0.737674	40	1	1	5	3	19.4	19.4	19.4	19.4			116.1	116.1	116.2	116.13	-0.73	-0.54	14.4	Normal weight	-0.64
793	1001	VMMR	906202	1999-09-23	2009-07-03	117	9	9.77854	Between 5 and 13	F		0.745269	40	1	1	5	4	41.95	41.95	41.95	41.95			138.5	138.5	138.6	138.53	1.61	0.2	21.9	Overweight	1.89
523	232	MBS	2016658	2004-02-09	2009-06-06	64	5	5.32511	Between 5 and 13	F		0.745951	22	1	1	9	6	18.1	18.1	18.1	18.1			112.4	112.5	112.5	112.47	-0.25	0.28	14.3	Normal weight	-0.66
745	861	GMOAD	D2017121	2004-03-13	2009-12-16	69	5	5.75822	Between 5 and 13	F		0.74657	22	1	1	6	4	27.4	27.45	27.45	27.43			114.6	114.6	114.7	114.63	2.08	0.18	20.9	Obesity	2.66
475	46	EBP	C439261	2003-01-26	2009-04-26	75	6	6.25	Between 5 and 13	F		0.750787	22	3	1	4	6	23.8	23.85	23.85	23.83			119.5	119.6	119.6	119.57	0.91	0.58	16.7	Normal weight	0.8
792	998	SPM	2028158	2002-07-12	2009-12-03	89	7	7.39201	Between 5 and 13	F		0.751165	40	1	1	4	3	25.4	25.45	24.45	25.1			131.5	131.6	131.5	131.53	0.45	1.51	14.5	Normal weight	-0.63
704	751	EKL	907891	2003-03-17	2009-10-20	79	6	6.59155	Between 5 and 13	F		0.755884	22	1	1	6	2	18.7	18.75	18.75	18.73			114.1	114.6	114.5	114.4	-0.92	-0.77	14.3	Normal weight	-0.68
533	267	MPC	2040543	2002-07-15	2009-06-12	83	6	6.90845	Between 5 and 13	F		0.760374	12	1	1	5	3	21.2	21.2	21.2	21.2			118.9	118.9	118.9	118.9	-0.29	-0.26	15	Normal weight	-0.24
599	464	JCD	B434137	1998-03-27	2009-08-18	137	11	11.392	Between 5 and 13	F		0.760711	32	1	1	5	3	42.75	42.75	42.75	42.75			150	150	150	150		0.37	19	Normal weight	0.59
587	431	VSC	865189	1999-11-15	2009-08-13	117	9	9.74452	Between 5 and 13	F		0.762429	22	1	1	4	4	38.35	38.35	38.4	38.37			146.5	146.4	146.5	146.47	1.19	1.49	17.9	Normal weight	0.64
598	462	POR	2005946	2003-06-04	2009-08-18	75	6	6.20502	Between 5 and 13	F		0.76269	32	1	1	4	2	23.35	23.35	23.4	23.37			111.5	111.6	111.5	111.53	0.81	-0.92	18.8	Overweight	1.79
574	395	ACSB	2021553	2004-06-25	2009-08-07	61	5	5.11735	Between 5 and 13	F		0.764831	22	2	1	12	4	21.7	21.7	21.7	21.7			113.1	113.1	113.2	113.13	1.13	0.69	17	Overweight	1.05
527	250	LLOS	2007842	2003-07-17	2009-06-09	71	5	5.89475	Between 5 and 13	F		0.766537	22	1	1	13	3	20.55	20.55	20.55	20.55			114.5	114.3	114.3	114.37	0.2	-0.03	15.7	Normal weight	0.28
600	465	TRO	853814	1998-09-30	2009-08-18	131	10	10.8838	Between 5 and 13	F		0.775297	17	1	1	4	3	31.8	31.8	31.8	31.8			140.5	140.4	140.5	140.47		-0.57	16.1	Normal weight	-0.52
611	481	RPC	843652	1997-11-13	2009-08-20	141	11	11.7692	Between 5 and 13	F		0.776519	32	1	1	5	3	40.95	40.95	40.95	40.95			152.1	152.1	152.2	152.13		0.34	17.7	Normal weight	-0.05
496	129	DAF	G215245	2003-12-21	2009-05-22	65	5	5.41941	Between 5 and 13	F		0.777853	22	1	1	5	6	21.8	21.85	21.8	21.82			111.2	111	111.2	111.13	0.94	-0.11	17.7	Overweight	1.39
753	879	VCRS	E16811	2001-10-13	2009-11-21	97	8	8.10525	Between 5 and 13	F		0.778804	11	1	1	5	4	28.4	28.45	28.4	28.42			127.5	127.5	127.6	127.53	0.68	0.06	17.5	Normal weight	0.87
772	932	RSR	H467416	2000-03-22	2009-11-30	116	9	9.68858	Between 5 and 13	F		0.779654	22	1	1	5	3	33.4	33.4	33.45	33.42			150.2	150.2	150.3	150.23	0.49	2.14	14.8	Normal weight	-0.93
501	154	MAS	H116424	2002-10-12	2009-05-25	79	6	6.61895	Between 5 and 13	F		0.779968	22	1	1	4	2	21.9	21.95	21.95	21.93			124.5	124.4	124.5	124.47	0.13	1.09	14.2	Normal weight	-0.8
596	456	HRO	A454361	2003-11-09	2009-08-17	69	5	5.77192	Between 5 and 13	F		0.782971	11	1	1	4	6	21.1	21.1	21.1	21.1			113	113.1	113	113.03	0.46	-0.15	16.5	Normal weight	0.76
746	862	JOSR	2039866	2003-04-26	2009-11-16	79	6	6.55594	Between 5 and 13	F		0.785439	22	1	1	6	3	18.9	18.95	18.95	18.93			112	111.9	111.9	111.93	-0.82	-1.2	15.1	Normal weight	-0.14
544	303	JBM	838658	1996-06-18	2009-06-21	156	13	13.0082	Between 5 and 13	F		0.786458	35	1	1	5	2	33.1	33.1	33.15	33.12			147.3	147.3	147.2	147.27		-1.32	15.3	Normal weight	-1.78
718	793	ASO	806109	1996-05-18	2009-10-28	161	13	13.4441	Between 5 and 13	F		0.789898	34	1	1	5	3	51.65	51.7	51.7	51.68			156	156.1	156.1	156.07		-0.29	21.2	Normal weight	0.71
686	686	PMSP	A7357	2002-03-02	2009-10-11	91	7	7.60799	Between 5 and 13	F		0.790957	40	1	1	4	3	27.45	27.45	27.5	27.47			127	126.7	126.8	126.83	0.83	0.45	17.1	Normal weight	0.79
608	477	BIPR	869002	2003-02-09	2009-08-20	78	6	6.53014	Between 5 and 13	F		0.794403	22	2	1	11	6	22.1	22.1	22.15	22.12			119.2	119.2	119.3	119.23	0.25	0.21	15.6	Normal weight	0.14
781	963	KASS	2019217	2004-04-29	2009-12-05	67	5	5.60091	Between 5 and 13	F		0.796173	22	1	1	10	4	22	22	22.05	22.02			118.5	118.5	118.4	118.47	0.86	1.14	15.7	Normal weight	0.28
737	836	ASS	902300	2002-09-06	2009-11-12	86	7	7.18311	Between 5 and 13	F		0.80083	22	1	1	5	3	26.9	26.9	26.95	26.92			128.5	128.6	128.5	128.53	1.01	1.21	16.3	Normal weight	0.48
627	523	RAS	806821	1997-02-28	2009-08-27	150	12	12.4973	Between 5 and 13	F		0.80187	22	1	1	5	3	44.3	44.35	44.35	44.33			164.1	64.1	164.2	130.8		-3.36	25.9	Obesity	2.06
636	550	MLGR	2034817	2000-10-30	2009-08-30	106	8	8.83333	Between 5 and 13	F		0.801883	22	1	1	5	2	30.35	30.35	30.4	30.37			134.1	134.2	134	134.1	0.55	0.43	16.9	Normal weight	0.43
486	87	CMAS	D114110	2002-11-19	2009-04-28	77	6	6.44132	Between 5 and 13	F		0.803992	35	1	1	4	6	20.6	20.65	20.65	20.63			118	118.1	118.1	118.07	-0.15	0.08	14.8	Normal weight	-0.33
579	409	TJS	H14729	2000-03-10	2009-08-10	113	9	9.41667	Between 5 and 13	F		0.804351	40	1	1	5	4	38.75	38.7	38.7	38.72			134.1	134.1	134.2	134.13	1.45	-0.15	21.5	Overweight	1.89
674	665	VMRS	A268780	2000-10-08	2009-10-09	108	9	9.00274	Between 5 and 13	F		0.806262	22	1	1	4	2	31.45	31.45	31.5	31.47			139.5	139.5	139.6	139.53	0.63	1.15	16.2	Normal weight	0.04
678	671	VBCP	H272633	2002-10-26	2009-10-09	84	7	6.95342	Between 5 and 13	F		0.80802	22	1	1	5	3	25.05	25.05	25.1	25.07			113	113.1	113	113.03	0.74	-1.38	19.6	Overweight	1.95
508	172	RO	2008912	2003-08-13	2009-05-28	70	5	5.7911	Between 5 and 13	F		0.81342	22	1	1	6	6	20.4	20.4	20.4	20.4			112.4	112.5	112.5	112.47	0.22	-0.28	16.1	Normal weight	0.53
670	660	ABAL	C223139	2000-05-08	2009-10-08	113	9	9.41667	Between 5 and 13	F		0.817519	12	1	1	4	2	25.4	25.35	25.4	25.38			133.5	133.5	133.5	133.5	-0.96	-0.25	14.2	Normal weight	-1.24
509	173	SAS	890517	1999-12-20	2009-05-28	113	9	9.43858	Between 5 and 13	F		0.821269	40	1	1	5	4	27.45	27.45	27.45	27.45			126.1	126.1	126	126.07	-0.48	-1.46	17.3	Normal weight	0.46
622	511	LAS	2015212	2004-01-28	2009-08-24	67	5	5.57237	Between 5 and 13	F		0.822241	6	1	1	5	3	21.15	21.15	21.15	21.15			110	110	110	110	0.62	-0.53	17.5	Overweight	1.28
514	190	YLTM	2005743	1999-07-29	2009-06-01	118	9	9.83995	Between 5 and 13	F		0.822336	6	1	1	5	3	36.1	36.1	36.1	36.1			148.3	148.5	148.3	148.37	0.8	1.69	16.4	Normal weight	-0.06
560	347	DLS	2010943	1996-05-14	2009-07-02	158	13	13.1338	Between 5 and 13	F		0.824447	10	1	1	5	3	59.05	59.05	59.05	59.05			161.4	161.5	161.4	161.43		0.65	22.7	Overweight	1.2
471	23	JAF	F254943	2002-12-10	2009-04-25	77	6	6.37443	Between 5 and 13	F		0.825781	35	1	1	5	6	22.15	22.15	22.15	22.15			113	113.1	113.1	113.07	0.36	-0.8	17.3	Overweight	1.11
617	500	VCSV	754618	1999-03-23	2009-08-23	125	10	10.4167	Between 5 and 13	F		0.828758	40	1	1	5	4	41.2	41.2	41.2	41.2			148.5	148.7	148.7	148.63		1.13	18.7	Normal weight	0.75
644	573	AFS	J211985	2004-07-02	2009-09-04	62	5	5.17215	Between 5 and 13	F		0.82904	40	1	1	4	6	16.05	16.05	16.05	16.05			106.05	106.05	106.1	106.07	-1	-0.85	14.3	Normal weight	-0.7
468	12	FBM	2038357	2003-03-08	2009-04-25	74	6	6.12991	Between 5 and 13	F		0.8367	11	3	1	6	2	17.6	17.6	17.65	17.62			111	111	111.1	111.03	-1.03	-0.94	14.3	Normal weight	-0.67
504	158	CRS	H443041	1999-05-15	2009-05-25	120	10	10.0274	Between 5 and 13	F		0.836849	6	1	1	4	3	31.85	31.85	31.85	31.85			134	134.1	134.1	134.07	0	-0.74	17.7	Normal weight	0.49
752	875	MAD	2066383	2000-07-19	2009-11-18	112	9	9.33059	Between 5 and 13	F		0.837877	34	2	1	5	4	36.65	36.7	36.7	36.68			137.5	137.45	137.45	137.47	1.23	0.48	19.4	Overweight	1.3
739	847	ATP	H165421	2004-06-06	2009-11-13	65	5	5.43584	Between 5 and 13	F		0.848864	22	1	1	5	6	25.05	25.05	25.05	25.05			115.3	115.2	115.3	115.27	1.78	0.71	18.9	Overweight	1.94
583	420	AFS	E453608	1997-01-19	2009-08-11	151	12	12.5614	Between 5 and 13	F		0.856968	20	1	1	5	4	44.85	44.85	44.85	44.85			157	157.1	157	157.03		0.39	18.2	Normal weight	-0.11
706	758	HMSBR	A330	2001-07-24	2009-10-21	99	8	8.24178	Between 5 and 13	F		0.858526	26	1	1	5	2	22.4	22.45	22.45	22.43			122.5	122.6	122.5	122.53	-0.88	-0.93	14.9	Normal weight	-0.49
493	117	HBPP	904582	2002-09-09	2009-05-22	80	6	6.70228	Between 5 and 13	F		0.864107	6	1	1	4	4	19.7	19.75	19.7	19.72			119.9	120	120	119.97	-0.63	0.16	13.7	Normal weight	-1.15
657	607	OBSG	B293238	2004-08-13	2009-10-02	62	5	5.13653	Between 5 and 13	F		0.87087	5	1	1	4	3	18.5	18.5	18.55	18.52			112.5	112.4	112.4	112.43	0.06	0.52	14.7	Normal weight	-0.42
655	602	JGD	20222506	2004-07-20	2009-10-01	62	5	5.19795	Between 5 and 13	F		0.871982	40	1	1	4	3	21.2	21.2	21.2	21.2			114.5	114.3	114.3	114.37	0.92	0.84	16.2	Normal weight	0.61
594	451	SNS	D230894	2000-09-03	2009-08-17	108	9	8.95502	Between 5 and 13	F		0.881165	17	1	1	5	3	33.9	33.9	33.9	33.9			127.8	127.9	127.9	127.87	1.07	-0.71	20.7	Overweight	1.8
465	7	MP	X	2003-06-30	2009-04-25	70	5	5.81963	Between 5 and 13	F		0.885553	35	2	1	4	3	21.65	21.65	21.6	21.63			110	110.1	110.2	110.1	0.59	-0.79	17.8	Overweight	1.43
528	253	RSCL	J444974	1997-05-26	2009-06-09	145	12	12.0368	Between 5 and 13	F		0.888009	13	3	1	5	3	54.3	54.3	54.3	54.3			157	157.1	157	157.03		0.81	22	Overweight	1.33
661	615	MEHP	2007144	2003-07-01	2009-10-04	75	6	6.25822	Between 5 and 13	F		0.889222	12	1	1	8	2	20	20	20	20			114.4	114.3	114.4	114.37	-0.23	-0.43	15.3	Normal weight	0
790	994	SVSL	2065808	2000-03-05	2009-11-05	116	9	9.66667	Between 5 and 13	F		0.890315	40	1	1	6	3	31.5	31.55	31.55	31.53			142.3	142.2	142.3	142.27	0.17	0.9	15.6	Normal weight	-0.46
613	487	MN	862553	1999-09-12	2009-08-21	119	9	9.94132	Between 5 and 13	F		0.900819	35	2	1	5	3	36	36	36.05	36.02			138.5	138.6	138.5	138.53	0.73	0.04	18.8	Normal weight	0.92
589	439	ALS	111759	1996-11-27	2009-08-16	153	12	12.7199	Between 5 and 13	F		0.902843	11	1	1	6	3	45.7	45.7	45.7	45.7			151	151.1	151.1	151.07		-0.58	20	Normal weight	0.54
561	356	JCFCS	859413	1999-07-08	2009-07-03	120	10	9.9863	Between 5 and 13	F		0.904886	22	1	1	4	1	28.85	28.85	28.85	28.85			142	142.1	142.1	142.07	-0.58	0.55	14.3	Normal weight	-1.37
557	336	LDPS	D312544	2004-02-13	2009-06-30	65	5	5.37991	Between 5 and 13	F		0.917893	32	1	1	5	6	20.75	20.75	20.75	20.75			119	119.1	119.1	119.07	0.64	1.56	14.6	Normal weight	-0.42
677	669	BN	2018413	2002-05-20	2009-10-09	89	7	7.38653	Between 5 and 13	F		0.919873	34	1	1	10	3	20.15	20.15	20.2	20.17			119.2	119.2	119.1	119.17	-0.96	-0.69	14.2	Normal weight	-0.84
503	156	SFM	887003	2000-04-18	2009-05-25	109	9	9.10251	Between 5 and 13	F		0.925898	6	1	1	5	5	44.4	44.4	44.4	44.4			139.5	139.4	139.5	139.47	2.31	1.04	22.8	Obesity	2.29
549	312	ASBM	B446335	2000-10-06	2009-06-22	105	8	8.7105	Between 5 and 13	F		0.928155	40	1	1	5	4	24.85	24.8	24.85	24.83			123.5	123.4	123.5	123.47	-0.57	-1.21	16.3	Normal weight	0.17
786	981	BCS	2042104	2004-02-28	2009-05-02	62	5	5.17877	Between 5 and 13	F		0.931819	40	1	1	6	2	18.8	18.8	18.85	18.82			107	107.2	107.2	107.13	0.14	-0.63	16.4	Normal weight	0.73
738	845	JRM	K191712	1999-01-22	2009-11-12	130	10	10.8059	Between 5 and 13	F		0.932013	6	1	1	5	4	43.9	43.95	43.9	43.92			149.5	149.5	149.6	149.53		0.88	19.6	Normal weight	0.99
711	766	KVO	905105	2002-03-11	2009-10-22	91	7	7.61347	Between 5 and 13	F		0.933126	12	1	1	6	2	24.2	24.25	24.25	24.23			125	125.1	125.1	125.07	0.07	0.13	15.5	Normal weight	-0.04
776	941	GGA	903597	1999-11-08	2009-12-08	121	10	10.0833	Between 5 and 13	F		0.935172	22	1	1	6	4	48.95	49	49	48.98			146.5	146.6	146.6	146.57		1.15	22.8	Obesity	2.03
485	86	LYSR	K66648	2002-06-20	2009-04-28	82	6	6.85525	Between 5 and 13	F		0.937825	6	1	1	5	2	22.35	22.4	22.4	22.38			122	122.1	122.1	122.07	0.1	0.38	15	Normal weight	-0.22
774	939	NMC	104961	1996-05-05	2009-12-03	163	13	13.5779	Between 5 and 13	F		0.938433	22	1	1	5	5	89.95	87	87	87.98			154.5	154.6	154.5	154.53		-0.58	36.8	Obesity	3.36
541	294	VMS	F59587	2000-06-07	2009-06-18	108	9	9.03014	Between 5 and 13	F		0.939754	22	1	1	4	4	49.9	49.9	49.9	49.9			143.8	143.9	143.9	143.87	2.88	1.83	24.1	Obesity	2.57
522	229	KMO	H367572	2000-05-06	2009-06-06	109	9	9.08333	Between 5 and 13	F		0.943973	40	1	1	5	3	29.5	29.5	29.5	29.5			132.6	132.5	132.5	132.53	0.2	-0.08	16.8	Normal weight	0.33
517	213	CMS	A17461	2000-06-26	2009-06-05	107	8	8.94247	Between 5 and 13	F		0.947982	12	1	1	5	2	22.5	22.5	22.5	22.5			132.2	132.2	132.1	132.17	-1.4	0	12.9	Thinness	-2.22
545	304	VRS	114592	1995-09-28	2009-06-21	165	13	13.7308	Between 5 and 13	F		0.951053	25	2	1	5	4	61.8	61.8	61.8	61.8			159.7	159.8	159.8	159.77		0.11	24.2	Overweight	1.43
615	492	ABMCB	768146	1995-11-30	2009-08-23	165	13	13.7308	Between 5 and 13	F		0.954386	22	2	1	5	3	41.85	41.85	41.85	41.85			157.8	157.8	157.8	157.8		-0.18	16.8	Normal weight	-1.14
681	675	GSS	2085869	2004-07-17	2009-10-11	63	5	5.23356	Between 5 and 13	F		0.954702	40	1	1	8	1	18.1	18.15	18.1	18.12			109	109	109.1	109.03	-0.17	-0.31	15.2	Normal weight	0
539	283	MFJ	G187924	2004-02-13	2009-06-16	64	5	5.34155	Between 5 and 13	F		0.955099	6	1	1	4	6	17.45	17.45	17.4	17.43			111	110.9	111	110.97	-0.53	-0.05	14.2	Normal weight	-0.78
838	180	DAR	H402685	2004-05-22	2009-05-29	60	5	5.01918	Between 5 and 13	F		0.963552	10	1	1	6	2	17	17.05	17.05	17.03			108.3	108.4	108.3	108.33	-0.25	-0.48	14.5	Normal weight	-0.53
638	556	VG	E456091	1999-01-02	2009-08-30	128	10	10.66	Between 5 and 13	F		0.969229	12	1	1	5	3	35.45	35.45	35.45	35.45			146.3	146.2	146.3	146.27		0.53	16.6	Normal weight	-0.21
697	732	GMT	D431712	2002-12-02	2009-10-18	83	6	6.87717	Between 5 and 13	F		0.974997	22	1	1	5	4	42.2	42.25	42.2	42.22			129.8	129.8	129.8	129.8	3.69	1.78	25.1	Obesity	3.57
733	825	CRSF	A463734	2004-05-06	2009-11-09	66	5	5.50822	Between 5 and 13	F		0.977596	35	1	1	6	3	17.9	17.95	17.9	17.92			110.3	110.3	110.4	110.33	-0.46	-0.39	14.7	Normal weight	-0.36
476	48	ACCAS	130129	2002-06-26	2009-04-27	82	6	6.83607	Between 5 and 13	F		0.977727	35	1	1	5	6	36.3	36.35	36.35	36.33			133	133	133.1	133.03	2.85	2.43	20.5	Obesity	2.28
717	791	MP	106714	1996-08-05	2009-10-26	159	13	13.2242	Between 5 and 13	F		0.97783	11	2	1	4	5	72.4	72.45	72.4	72.42			156	156.1	156.1	156.07		-0.18	29.7	Obesity	2.52
763	912	GGS	2010229	2003-09-15	2009-11-24	74	6	6.19132	Between 5 and 13	F		0.992203	32	1	1	4	6	19	19.05	19.05	19.03			114.5	114.5	114.6	114.53	-0.53	-0.33	14.5	Normal weight	-0.52
767	921	DA		1998-01-20	2009-11-26	142	11	11.8498	Between 5 and 13	F		0.993601	12	1	1	5	2	34.55	34.6	34.6	34.58			147.5	147.6	147.5	147.53		-0.41	15.9	Normal weight	-0.98
716	790	LAM	2108424	2000-05-18	2009-10-27	113	9	9.44132	Between 5 and 13	F		0.994067	10	1	1	8	5	45.65	45.7	45.7	45.68			138	138.1	138	138.03	2.23	0.45	24	Obesity	2.44
562	359	EXL	2010554	2003-09-22	2009-07-03	69	5	5.78128	Between 5 and 13	F		0.994836	40	1	1	6	6	21.3	21.3	21.3	21.3			118.5	118.6	118.5	118.53	0.52	0.93	15.2	Normal weight	-0.06
467	11	PMP	K439086	1994-09-03	2009-04-25	176	14	14.6436	Greater than 13	F			19	1	1	6	3	48.65	48.65	48.6	48.63			158	158.1	158.1	158.07		-0.44	19.5	Normal weight	-0.2
469	16	LPS	X	1994-06-27	2009-04-25	178	14	14.8279	Greater than 13	F			10	1	1	6	5	65.15	65.2	65.2	65.18			163	163.2	163.2	163.13		0.25	24.5	Overweight	1.27
487	93	DSS	B4477	1994-10-07	2009-04-29	175	14	14.5603	Greater than 13	F			40	1	1	5	1	44.1	44.1	44.15	44.12			154	154.1	154	154.03		-1.01	18.6	Normal weight	-0.53
551	320	KCA	750268	1995-01-12	2009-06-23	173	14	14.4468	Greater than 13	F			22	1	1	5	3	56.25	56.2	56.25	56.23			168.5	168.4	168.5	168.47		1.11	19.8	Normal weight	-0.02
584	422	SHS	760780	1995-05-09	2009-08-11	171	14	14.2555	Greater than 13	F			22	1	1	5	3	50.2	50.2	50.3	50.23			162.8	162.8	162.8	162.8		0.35	19	Normal weight	-0.31
607	476	FSNL	2088144	1994-09-15	2009-08-20	179	14	14.9304	Greater than 13	F			25	1	1	5	1	47.7	47.7	47.75	47.72			167.9	167.9	168	167.93		0.92	16.9	Normal weight	-1.4
610	480	BVD	D452966	1994-10-26	2009-08-20	178	14	14.8169	Greater than 13	F			12	1	1	5	3	53.05	53.05	53.05	53.05			161.8	161.8	161.9	161.83		0.06	20.3	Normal weight	0.05
624	514	EAS	111236	1995-07-01	2009-08-25	170	14	14.1491	Greater than 13	F			40	1	1	4	5	83.25	83.2	83.25	83.23			161.5	161.4	161.5	161.47		0.19	31.9	Obesity	2.67
637	552	BSV	H455093	1995-08-21	2009-08-30	168	14	14.0247	Greater than 13	F			6	1	1	5	3	55.3	55.35	55.3	55.32			165.5	165.4	165.3	165.4		0.8	20.2	Normal weight	0.23
640	561	MCN	108526	1995-07-26	2009-08-18	169	14	14.0614	Greater than 13	F			6	1	1	5	3	50.65	50.65	50.65	50.65			154.2	154.1	154.2	154.17		-0.83	21.3	Normal weight	0.58
650	593	GBA	840424	1995-09-28	2009-09-29	168	14	14.0027	Greater than 13	F			34	1	1	8	5	50.8	50.85	50.85	50.83			144.5	144.6	144.5	144.53		-2.2	24.3	Overweight	1.4
688	689	PSM	768808	1995-07-09	2009-10-12	171	14	14.2582	Greater than 13	F			32	1	1	5	5	69.35	69.4	69.4	69.38			159	159.1	159	159.03		-0.2	27.4	Overweight	1.97
690	705	BMCL	C359274	1995-09-28	2009-10-14	169	14	14.045	Greater than 13	F			22	1	1	5	3	56.4	56.4	56.5	56.43			162	162.1	162	162.03		0.31	21.5	Normal weight	0.64
698	733	JTP	826249	1995-09-08	2009-10-18	169	14	14.1107	Greater than 13	F			40	1	1	5	5	70	70	70	70			164.4	164.4	164.5	164.43		0.63	25.9	Overweight	1.71
705	753	NSA	743784	1995-02-07	2009-10-20	177	14	14.7023	Greater than 13	F			12	1	1	5	4	51.7	51.75	51.7	51.72			153	153.1	153.1	153.07		-1.18	22.1	Normal weight	0.66
724	803	KMA	C379622	1995-10-17	2009-10-30	169	14	14.0356	Greater than 13	F			12	1	1	6	3	47.55	47.55	47.55	47.55			157.5	157.5	157.5	157.5		-0.34	19.2	Normal weight	-0.16
744	857	SDC	775530	1995-06-28	2009-11-16	173	14	14.3838	Greater than 13	F			40	1	1	5	3	48.4	48.35	48.4	48.38			156.6	156.5	156.6	156.57		-0.59	19.7	Normal weight	-0.04
794	2	IBRL	E226585	2005-06-08	2009-04-24	47	3	3.87717	Less than 5	F			32	1	1	9	99	16.25	16.25	16.2	16.23			96	96.1	96.1	96.07	-1.36	0.19	17.6	Overweight	1.49
795	4	PVYS	X	2006-04-03	2009-04-24	37	3	3.05753	Less than 5	F			30	1	1	12	99	18.75	18.7	18.75	18.73			97	97.1	97.2	97.1	0.41	2.15	19.9	Obesity	2.78
796	8	LCSG	2029320	2005-01-01	2009-04-25	52	4	4.31575	Less than 5	F			10	1	1	6	99	16.05	16.05	16.1	16.07			100	100	100.1	100.03	-1.1	-0.29	16.1	Normal weight	0.54
797	17	MKFG	2041181	2005-08-28	2009-04-25	44	3	3.65845	Less than 5	F			40	1	0	0	99	16.9	16.95	16.95	16.93			99	99.1	99.2	99.1	-0.28	0.73	17.2	Overweight	1.3
798	20	JSP	2034864	2005-04-24	2009-04-25	48	4	4.00274	Less than 5	F			40	1	1	4	99	15.05	15.05	15	15.03			97	97.1	97.1	97.07	-1.32	-0.49	16	Normal weight	0.48
799	24	PAS	D213489	2004-05-04	2009-04-25	60	5	4.9742	Less than 5	F			40	1	1	5	99	26	26.06	26.05	26.04			112	112.1	112.1	112.07	0.59	2.29	20.7	Obesity	2.87
800	25	IALS	J321199	2006-03-08	2009-04-25	38	3	3.12991	Less than 5	F			11	1	0	0	99	16.65	16.7	16.7	16.68			97.5	97.5	97.6	97.53	0.36	1.23	17.5	Overweight	1.48
801	27	ALSP	2094576	2006-10-29	2009-04-25	30	2	2.48904	Less than 5	F			10	1	0	0	99	14.05	14.05	14.05	14.05			89	89	89	89	-0.45	0.8	17.7	Overweight	1.52
802	29	KMS	X	2007-02-27	2009-04-25	26	2	2.16119	Less than 5	F			40	1	0	0	99	14	14.1	14.1	14.07			86	86	86	86	-0.41	1.33	19	Obesity	2.2
803	30	ALJS	E419723	2007-04-02	2009-04-25	25	2	2.06301	Less than 5	F			40	1	1	8	99	12.55	12.5	12.5	12.52			85	85	85	85	-0.43	0.58	17.3	Overweight	1.16
804	33	RMC	2081574	2006-01-25	2009-04-25	39	3	3.25	Less than 5	F			22	1	1	9	99	14	14.15	14.15	14.1			95	95	95	95	-0.52	-0.16	15.6	Normal weight	0.2
805	37	EFR	2086064	2004-11-19	2009-04-26	53	4	4.43584	Less than 5	F			40	1	1	10	99	14.6	14.65	14.6	14.62			103	103.1	103.1	103.07	-0.59	-1.09	13.8	Normal weight	-1.12
806	38	VPM	G291944	2006-05-25	2009-04-26	35	2	2.91941	Less than 5	F			40	1	1	10	99	13.2	13.25	13.25	13.23			98.5	98.7	98.7	98.63	1.13	-0.26	13.6	Normal weight	-1.53
807	53	NSS	X	2007-03-03	2009-04-27	26	2	2.14909	Less than 5	F			40	1	0	0	99	13.1	13.15	13.1	13.12			85	85.1	85	85.03	-0.68	0.8	18.1	Overweight	1.69
808	57	GVS	2027818	2004-11-25	2009-04-27	53	4	4.42215	Less than 5	F			40	1	0	0	99	18.25	18.3	18.3	18.28			105	105	105.1	105.03	-0.13	0.51	16.6	Normal weight	0.86
809	59	MGSS	2051051	2006-03-30	2009-04-27	37	3	3.07511	Less than 5	F			22	1	1	9	99	14.55	14.55	14.6	14.57			94	94.1	94.1	94.07	-0.42	0.29	16.5	Normal weight	0.78
810	64	RLSS	2070891	2007-03-13	2009-04-28	26	2	2.12443	Less than 5	F			22	1	0	0	99	10.65	10.65	10.6	10.63			82	82.1	82.1	82.07	-1.5	-0.85	15.8	Normal weight	0.1
811	66	YBS	2084069	2007-03-27	2009-04-28	25	2	2.08607	Less than 5	F			40	1	1	8	99	12.2	12.2	12.25	12.22			85	85.1	85.1	85.07	-0.48	0.35	16.9	Normal weight	0.87
812	69	MSSS	X	2004-11-21	2009-04-28	53	4	4.43584	Less than 5	F			22	1	1	4	99	21.25	21.25	21.3	21.27			107	107.1	107.1	107.07	0.3	1.5	18.6	Overweight	1.96
813	71	KFO	2103882	2006-02-14	2009-04-28	38	3	3.20502	Less than 5	F			40	2	0	0	99	14.75	14.75	14.75	14.75			98.5	98.5	98.5	98.5	0.46	0.23	15.2	Normal weight	-0.12
814	72	NMS	E431622	2006-02-21	2009-04-28	38	3	3.18584	Less than 5	F			40	1	0	0	99	15.85	15.85	15.9	15.87			97	97.1	97	97.03	0.13	0.8	16.9	Overweight	1.05
815	77	JVBS	2061620	2006-11-15	2009-04-28	29	2	2.45228	Less than 5	F			40	1	0	0	99	10.7	10.7	10.75	10.72			85	85.1	85.1	85.07	-1.47	-1.31	14.8	Normal weight	-0.58
816	88	ASSM	X	2005-04-04	2009-04-29	49	4	4.06849	Less than 5	F			22	1	1	5	99	15.8	15.85	15.85	15.83			105	105.1	105.1	105.07	0.43	-0.17	14.3	Normal weight	-0.68
817	89	PSS	2038405	2005-07-01	2009-04-29	46	3	3.82671	Less than 5	F			40	1	0	0	99	13.05	13.05	13.1	13.07			100	100.2	100.1	100.1	-0.33	-1.38	13	Normal weight	-1.82
818	95	YSLG	2093938	2007-01-10	2009-04-29	28	2	2.30205	Less than 5	F			40	1	0	0	99	14.15	14.15	14.1	14.13			89.5	89.5	89.6	89.53	0.22	1.13	17.6	Overweight	1.41
819	96	RCOL	2056064	2006-07-10	2009-04-29	34	2	2.80205	Less than 5	F			22	1	0	0	99	16	16.05	16.05	16.03			99	99.1	99.1	99.07	1.53	1.36	16.3	Normal weight	0.65
820	97	MAAM	J301563	2006-03-02	2009-04-29	38	3	3.15731	Less than 5	F			22	1	1	10	99	12.8	12.8	12.85	12.82			97.5	97.5	97.6	97.53	0.3	-0.8	13.5	Normal weight	-1.58
821	103	BRS	2047598	2006-01-16	2009-05-19	40	3	3.34155	Less than 5	F			38	1	1	8	99	13.65	13.5	13.6	13.58			94	94.5	94	94.17	-0.91	-0.56	15.3	Normal weight	-0.02
822	113	JSO	2039403	2004-11-12	2009-05-21	54	4	4.52466	Less than 5	F			40	1	1	5	99	17.5	17.45	17.5	17.48			100	100.5	100	100.17	-1.35	0.11	17.4	Overweight	1.34
823	114	KPT	D340935	2007-02-19	2009-05-21	27	2	2.25548	Less than 5	F			11	1	1	4	99	14.3	14.25	14.35	14.3			93	93.5	93	93.17	1.44	1.3	16.5	Normal weight	0.63
824	118	EPP	H384397	2007-02-26	2009-05-22	27	2	2.23904	Less than 5	F			9	1	0	0	99	11.45	11.49	11.51	11.48			85.5	86	86	85.83	-0.68	-0.4	15.6	Normal weight	-0.02
825	120	ESS	2064180	2007-01-21	2009-05-22	28	2	2.33607	Less than 5	F			40	1	1	9	99	13.1	13.1	13.1	13.1			91	91	91.2	91.07	0.58	0.5	15.8	Normal weight	0.16
826	127	JRS	2041302	2005-08-30	2009-05-22	45	3	3.72808	Less than 5	F			35	1	0	0	99	12.45	12.5	12.45	12.47			94	94.2	94	94.07	-1.6	-1.64	14.1	Normal weight	-0.93
827	131	JCSR	H435596	2007-04-25	2009-05-23	25	2	2.07785	Less than 5	F			35	1	1	4	99	14.75	14.755	14.75	14.75			94.5	94.4	94.5	94.47	2.42	1.82	16.5	Normal weight	0.63
828	138	MCS	2072824	2007-04-25	2009-05-23	25	2	2.07785	Less than 5	F			35	1	1	8	99	12.15	12.2	12.2	12.18			83	83.2	83.3	83.17	-1.03	0.34	17.6	Overweight	1.34
829	143	YMA	H442847	2006-08-13	2009-05-24	33	2	2.78014	Less than 5	F			40	1	0	0	99	16.55	16.6	16.6	16.58			95.1	95	95	95.03	0.5	1.64	18.4	Overweight	1.94
830	145	JMSP	I440681	2005-03-30	2009-05-24	50	4	4.15023	Less than 5	F			34	1	1	5	99	18.45	18.5	18.45	18.47			101	100.8	101	100.93	-0.65	0.83	18.1	Overweight	1.78
831	150	FCN	K418131	2005-10-03	2009-05-24	44	3	3.64087	Less than 5	F			22	1	1	4	99	15.05	15.05	15.05	15.05			97.5	97.5	97.5	97.5	-0.63	-0.11	15.8	Normal weight	0.38
832	153	LNMO	J359876	2007-02-12	2009-05-25	27	2	2.28562	Less than 5	F			22	1	1	10	99	13.7	13.7	13.7	13.7			91.8	92	92	91.93	0.98	0.93	16.2	Normal weight	0.45
833	161	TC	?	2007-01-27	2009-05-25	28	2	2.32785	Less than 5	F			22	1	0	0	99	10.615	10.6	10.615	10.61			82.5	82.5	82.5	82.5	-1.9	-1.2	15.6	Normal weight	0.01
835	168	RMS	2101206	2006-03-08	2009-05-26	39	3	3.21598	Less than 5	F			22	1	0	0	99	15.4	15	15.45	15.28			93.1	93.1	92.9	93.03	-0.97	0.48	17.7	Overweight	1.55
836	176	APLC	H378615	2007-05-18	2009-05-28	24	2	2.0274	Less than 5	F			35	1	0	0	99	10.9	10.9	10.95	10.93			77	76.9	76.9	76.93	-2.8	-0.45	18.5	Overweight	1.85
837	177	IAP	G340430	2007-05-28	2009-05-28	24	2	2	Less than 5	F			40	1	0	0	99	13.32	13.2	13.3	13.27			91.3	91.2	91.4	91.3	1.73	1.14	15.9	Normal weight	0.17
839	184	RJG	2042853	2006-09-29	2009-05-29	32	2	2.66667	Less than 5	F			34	1	1	9	99	16.8	16.8	16.85	16.82			99	98.9	98.9	98.93	1.87	1.9	17.2	Overweight	1.2
840	198	ABBN	G444112	2007-04-30	2009-06-02	25	2	2.08995	Less than 5	F			12	1	1	9	99	13.95	13.95	13.9	13.93			93.5	93.5	93.4	93.47	2.07	1.36	15.9	Normal weight	0.21
841	201	RCS	2037636B	2005-06-16	2009-06-04	48	4	3.96712	Less than 5	F			34	1	1	9	99	15.25	15.25	15.25	15.25			93.5	93.3	93.3	93.37	-2.13	-0.35	17.5	Overweight	1.44
842	203	ACM	2064880	2007-02-06	2009-06-04	28	2	2.32785	Less than 5	F			40	3	1	10	99	13.55	13.55	13.55	13.55			91.3	91.2	91.3	91.27	0.66	0.77	16.3	Normal weight	0.5
843	207	NPS	F444348	2007-04-15	2009-06-04	26	2	2.13653	Less than 5	F			22	1	1	9	99	9.8	9.85	9.8	9.82			78.1	78.1	78.1	78.1	-2.73	-1.54	16.1	Normal weight	0.34
844	208	MLBS	2069816	2007-05-18	2009-06-04	25	2	2.04498	Less than 5	F			22	1	1	10	99	15.2	15.2	15.2	15.2			94.3	94.5	94.3	94.37	2.5	2.1	17.1	Normal weight	0.99
845	209	KIG	2048102	2006-01-20	2009-06-04	40	3	3.37283	Less than 5	F			40	1	1	7	99	14.8	14.8	14.8	14.8			94.8	94.8	94.9	94.83	-0.8	0.06	16.5	Normal weight	0.8
846	212	BCLS	2092644	2004-09-16	2009-06-05	57	4	4.71986	Less than 5	F			22	1	1	8	99	17.25	17.25	17.2	17.23			107.3	107.3	107.4	107.33	-0.06	-0.15	15	Normal weight	-0.21
847	215	AVAS	2070255	2007-05-28	2009-06-05	24	2	2.02032	Less than 5	F			22	1	1	10	99	11.75	11.75	11.75	11.75			86.5	86.4	86.5	86.47	0.16	0.15	15.7	Normal weight	0.03
848	216	GGP	G336300	2007-04-07	2009-06-05	26	2	2.16119	Less than 5	F			22	1	1	7	99	11.065	11.065	11.065	11.07			86.9	86.9	87	86.93	-0.14	-0.58	14.6	Normal weight	-0.78
849	217	KRS	B44776	2004-09-07	2009-06-05	57	4	4.74452	Less than 5	F			35	1	1	4	99	15.3	15.3	15.3	15.3			109.5	109.5	109.4	109.47	0.37	-1.01	12.8	Normal weight	-1.94
850	224	AMA	D44535	2007-06-03	2009-06-06	24	2	2.00822	Less than 5	F			40	1	0	0	99	13.05	13.05	13.1	13.07			90	90.1	90.1	90.07	1.32	1.01	16.1	Normal weight	0.31
851	225	ACL	E390150	2006-05-06	2009-06-06	37	3	3.08333	Less than 5	F			22	1	1	8	99	12.75	12.75	12.75	12.75			94.9	94.9	95	94.93	-0.21	-0.76	14.1	Normal weight	-1
852	238	ABG	E397419	2007-06-09	2009-06-06	24	2	1.99178	Less than 5	F			22	1	0	0	99	11.25	11.3	11.3	11.28			83.4	83.5	83.5	83.47	-0.89	-0.13	16.2	Normal weight	0.57
853	243	MEMGS	2030749	2005-02-03	2009-06-07	52	4	4.34429	Less than 5	F			3	1	1	4	99	18.75	18.75	18.75	18.75			107.7	107.7	107.6	107.67	0.58	0.75	16.2	Normal weight	0.62
854	244	IBSS	G435113	2006-02-13	2009-06-07	40	3	3.31689	Less than 5	F			22	1	0	0	99	15.9	15.9	15.95	15.92			88	88.2	88.3	88.17	-2.37	0.67	20.5	Obesity	3.07
855	245	AASD	J444718	2007-02-06	2009-06-07	28	2	2.33607	Less than 5	F			12	3	0	0	99	13	12.9	13	12.97			89.1	89	89	89.03	-0.02	0.42	16.4	Normal weight	0.57
856	246	ABLR	2094978	2006-11-10	2009-06-07	31	2	2.57511	Less than 5	F			12	1	1	9	99	10.965	11.005	10.965	10.98			83	83.2	83.2	83.13	-2.3	-1.29	15.9	Normal weight	0.29
857	255	ISS	B445023	2007-02-15	2009-06-10	28	2	2.31963	Less than 5	F			34	1	1	9	99	11.45	11.45	11.45	11.45			90	90.1	90	90.03	0.32	-0.56	14.1	Normal weight	-1.2
858	258	ABSS	2055792	2006-07-04	2009-06-12	35	2	2.93858	Less than 5	F			22	1	1	9	99	12.8	12.8	12.8	12.8			95.5	95.3	95.3	95.37	0.22	-0.54	14.1	Normal weight	-1.09
859	260	AGP	I181481	2004-07-31	2009-06-12	58	4	4.86461	Less than 5	F			40	1	1	4	99	17.95	17.95	17.95	17.95			109.6	109.6	109.5	109.57	0.21	0.01	15	Normal weight	-0.22
860	261	KJO	2070497	2007-06-02	2009-06-12	24	2	2.0274	Less than 5	F			40	1	1	9	99	11	11	11	11			84.2	84	84	84.07	-0.6	-0.4	15.6	Normal weight	-0.09
861	265	ABRS	2044644	2006-11-07	2009-06-12	31	2	2.59703	Less than 5	F			12	3	1	10	99	13.45	13.45	13.45	13.45			94.5	94.4	94.5	94.47	0.81	0.31	15.1	Normal weight	-0.34
862	266	RMS	2051327	2006-04-04	2009-06-12	38	3	3.18858	Less than 5	F			6	1	1	9	99	13.4	13.4	13.4	13.4			96.1	96.1	96	96.07	-0.14	-0.49	14.5	Normal weight	-0.66
863	271	MEMM	2096403	2006-12-16	2009-06-13	30	2	2.49178	Less than 5	F			9	1	1	6	99	12.85	12.85	12.9	12.87			92.5	92.4	92.5	92.47	0.53	0.11	15.1	Normal weight	-0.37
864	272	MESM	2083751	2007-03-06	2009-06-16	27	2	2.2774	Less than 5	F			22	1	0	0	99	11.4	11.4	11.45	11.42			85.1	85.1	85	85.07	-1.03	-0.52	15.8	Normal weight	0.14
865	274	MCS	2086896	2007-05-13	2009-06-13	25	2	2.08333	Less than 5	F			10	1	1	8	99	13.8	13.8	13.8	13.8			89.8	90	89.8	89.87	0.99	1.3	17.1	Overweight	1.01
866	279	BLMS	B218328	2005-05-03	2009-06-13	49	4	4.11073	Less than 5	F			12	1	1	5	99	23.55	23.55	23.55	23.55			113	112.9	112.9	112.93	2.16	2.47	18.5	Overweight	1.96
867	287	GMSN	2062339	2006-12-02	2009-06-16	30	2	2.53836	Less than 5	F			40	1	0	0	99	13.45	13.45	13.45	13.45			92	92	92	92	0.27	0.39	15.9	Normal weight	0.28
868	288	ABGBS	2094627	2006-10-31	2009-06-16	32	2	2.62557	Less than 5	F			40	1	1	6	99	14.1	14.15	14.1	14.12			92.1	92.2	92.1	92.13	0.08	0.65	16.6	Normal weight	0.83
869	289	JRM	2026689	2004-11-02	2009-06-16	55	4	4.62169	Less than 5	F			40	1	0	0	99	16.3	16.3	16.3	16.3			104	104.1	104	104.03	-0.64	-0.46	15.1	Normal weight	-0.13
870	290	KASL	G437210	2005-09-25	2009-06-16	45	3	3.72534	Less than 5	F			10	1	1	4	99	15.15	15.15	15.15	15.15			100	100.1	100.1	100.07	-0.16	-0.15	15.1	Normal weight	-0.11
871	293	ACRM	H445843	2005-11-25	2009-06-18	43	3	3.56416	Less than 5	F			12	1	1	4	99	16.45	16.45	16.45	16.45			96	96.1	96	96.03	-0.85	0.62	17.8	Overweight	1.66
872	298	DWAS	A446240	2006-11-11	2009-06-21	31	2	2.61073	Less than 5	F			40	1	1	9	99	15.25	15.2	15.25	15.23			90.8	90.8	90.9	90.83	-0.24	1.24	18.5	Overweight	1.97
873	300	SMS	2045865	2005-12-04	2009-06-21	43	3	3.54658	Less than 5	F			12	1	1	9	99	17.9	17.9	17.95	17.92			105.3	105.2	105.3	105.27	1.44	1.25	16.2	Normal weight	0.61
874	305	VBN	2044279	2005-04-06	2009-06-22	51	4	4.2105	Less than 5	F			40	1	1	4	99	22.75	22.75	22.75	22.75			99.5	99.4	99.5	99.47	-1.08	2.15	23	Obesity	4.1
875	309	MAAS	2096923	2007-02-02	2009-06-22	29	2	2.38813	Less than 5	F			22	1	1	8	99	12.1	12.15	12.2	12.15			90.2	90.4	90.3	90.3	0.2	-0.18	14.9	Normal weight	-0.52
876	310	ACNS	E446332	2007-04-03	2009-06-22	27	2	2.21872	Less than 5	F			9	1	1	8	99	15.55	15.5	15.55	15.53			94.1	94.1	94.2	94.13	1.83	1.97	17.5	Overweight	1.33
877	313	CVST	2051602	2006-02-18	2009-06-23	40	3	3.34703	Less than 5	F			40	1	1	4	99	18.55	18.55	18.55	18.55			105	104.9	104.9	104.93	1.78	1.73	16.8	Overweight	1.05
878	315	IVSN	2050118	2006-03-12	2009-06-23	39	3	3.28014	Less than 5	F			40	1	1	9	99	13.85	13.85	13.8	13.83			95.8	96	95.9	95.9	-0.37	-0.36	15	Normal weight	-0.23
879	317	GCN	2072021	2006-12-22	2009-06-23	30	2	2.50274	Less than 5	F			36	1	1	9	99	14.1	14.1	14.2	14.13			88	88.1	88.1	88.07	-0.75	0.83	18.2	Overweight	1.81
880	325	NTM	2083899	2007-03-09	2009-06-26	28	2	2.29658	Less than 5	F			40	1	1	10	99	11.65	11.65	11.6	11.63			89.5	89.4	89.5	89.47	0.2	-0.4	14.5	Normal weight	-0.85
881	329	JLFS	2055192	2006-06-22	2009-06-26	36	3	3.01096	Less than 5	F			40	1	0	0	99	17.6	17.6	17.65	17.62			100	100	100	100	1.27	1.78	17.6	Overweight	1.52
882	331	SML	K379917	2006-02-23	2009-06-30	40	3	3.35251	Less than 5	F			32	1	1	5	99	16.65	16.65	16.6	16.63			101	101.1	101	101.03	0.79	0.95	16.3	Normal weight	0.68
883	334	ALFR	2093069	2006-09-14	2009-06-30	34	2	2.79384	Less than 5	F			40	1	1	9	99	13.15	13.1	13.15	13.13			91.3	91.2	91.2	91.23	-0.56	-0.15	15.8	Normal weight	0.25
884	340	NVSA	2063751	2006-07-21	2009-06-30	35	2	2.94132	Less than 5	F			22	1	1	8	99	12.75	12.7	12.75	12.73			97	97	97	97	0.64	-0.59	13.5	Normal weight	-1.59
885	360	AYSS	2103378	2007-06-03	2009-07-03	25	2	2.08333	Less than 5	F			22	1	0	0	99	11.25	11.25	11.2	11.23			85.2	85.1	85.2	85.17	-0.43	-0.32	15.5	Normal weight	-0.14
886	362	ADML	2033948	2005-04-06	2009-07-04	51	4	4.24452	Less than 5	F			22	1	1	8	99	18	18	18	18			104.6	104.6	104.5	104.57	0.03	0.57	16.5	Normal weight	0.8
887	366	PSA	C255222	2005-05-20	2009-07-04	50	4	4.12283	Less than 5	F			40	1	1	4	99	16.4	16.4	16.4	16.4			102.5	102.5	102.6	102.53	-0.24	0.03	15.6	Normal weight	0.24
888	378	RBM	2065497	2005-09-25	2009-07-09	45	3	3.7895	Less than 5	F			35	1	1	8	99	16.5	16.55	16.5	16.52			101.5	101.6	101.5	101.53	0.08	0.41	16	Normal weight	0.52
889	383	LPB	2036891	2005-06-02	2009-07-10	49	4	4.10525	Less than 5	F			22	1	1	10	99	19.45	19.45	19.5	19.47			106.5	106.6	106.5	106.53	0.7	1.23	17.2	Overweight	1.23
890	391	RSSO	2041434	2005-09-01	2009-08-04	47	3	3.92489	Less than 5	F			24	1	1	10	99	14.85	14.85	14.85	14.85			100	100	100	100	-0.51	-0.5	14.9	Normal weight	-0.31
891	400	AGFS	2047984	2006-01-26	2009-08-07	42	3	3.53128	Less than 5	F			22	1	1	8	99	13	12.95	12.95	12.97			99.5	99.5	99.5	99.5	0.06	-1.13	13.1	Normal weight	-1.84
892	402	MMS	K404473	2005-08-10	2009-08-10	48	4	4	Less than 5	F			40	1	0	0	99	14.9	14.9	14.95	14.92			97.5	97.5	97.55	97.52	-1.21	-0.54	15.7	Normal weight	0.3
893	412	NVS	246985	2005-02-18	2009-08-11	54	4	4.48082	Less than 5	F			32	1	1	4	99	17.1	17.1	17.1	17.1			107.8	107.8	107.9	107.83	0.4	0	14.7	Normal weight	-0.39
894	417	GGP	336300	2007-04-27	2009-08-11	28	2	2.2895	Less than 5	F			34	1	1	6	99	12.5	12.5	12.55	12.52			89.3	89.4	89.4	89.37	0.2	0.2	15.7	Normal weight	0.06
895	419	RAF	2069559	2007-05-13	2009-08-11	27	2	2.24452	Less than 5	F			22	1	1	9	99	14.65	14.6	14.65	14.63			91	91.2	91.1	91.1	0.84	1.48	17.6	Overweight	1.39
896	421	SCS	A334579	2006-12-26	2009-08-11	32	2	2.62557	Less than 5	F			12	1	1	9	99	13.5	13.5	13.45	13.48			92.5	92.4	92.5	92.47	0.18	0.29	15.8	Normal weight	0.21
897	424	RCGS	2040811	2005-08-19	2009-08-13	48	4	3.98356	Less than 5	F			25	1	1	6	99	19.25	19.25	19.25	19.25			117.1	117	117	117.03	3.35	1.28	14.1	Normal weight	-0.92
898	425	MAS	2028382	2004-12-07	2009-08-13	56	4	4.68311	Less than 5	F			40	1	1	6	99	18.8	18.85	18.9	18.85			105.8	105.9	105.8	105.83	-0.34	0.49	16.8	Normal weight	0.99
899	429	MBO	2025562	2004-10-03	2009-08-13	58	4	4.86073	Less than 5	F			40	1	0	0	99	18.35	18.35	18.4	18.37			109.1	109	109	109.03	0.11	0.17	15.5	Normal weight	0.12
900	432	FDB	2041241	2005-07-30	2009-08-13	48	4	4.03676	Less than 5	F			40	1	0	0	99	16.5	16.55	16.55	16.53			100.5	100.5	100.5	100.5	-0.58	0.16	16.4	Normal weight	0.75
901	436	MÊS	2091566	2006-02-17	2009-08-16	42	3	3.49726	Less than 5	F			34	1	1	9	99	15.65	15.65	15.6	15.63			99.5	99.6	99.6	99.57	0.14	0.33	15.8	Normal weight	0.33
902	438	MLFS	K454177	2006-08-20	2009-08-16	36	3	2.98904	Less than 5	F			29	1	1	9	99	15.9	15.9	15.9	15.9			97	97.1	97.1	97.07	0.55	1.06	16.9	Overweight	1.05
903	444	MGA	2061372	2006-11-08	2009-08-16	33	2	2.77192	Less than 5	F			35	1	1	10	99	13.35	13.35	13.4	13.37			94	94.1	94	94.03	0.25	0.02	15.1	Normal weight	-0.26
904	450	LMS	2045867	2005-12-04	2009-08-17	44	3	3.70228	Less than 5	F			11	1	1	4	99	14.05	14.05	14.05	14.05			98.9	98.9	98.9	98.9	-0.4	-0.69	14.4	Normal weight	-0.71
905	457	BPO	2053677	2005-12-12	2009-08-17	44	3	3.68037	Less than 5	F			22	1	1	9	99	14.1	14.15	14.1	14.12			98.1	98	98	98.03	-0.57	-0.63	14.7	Normal weight	-0.45
906	469	MLS	B454549	2006-09-29	2009-08-18	35	2	2.88653	Less than 5	F			32	1	1	9	99	11.85	11.85	11.9	11.87			86.5	86.5	86.6	86.53	-2.02	-1.08	15.9	Normal weight	0.32
907	482	GAS	K454800	2006-05-12	2009-08-20	39	3	3.27192	Less than 5	F			10	1	1	8	99	11.35	11.35	11.4	11.37			92.5	92.3	92.5	92.43	-1.23	-1.91	13.3	Normal weight	-1.71
908	490	GPN	E351382	2005-01-18	2009-08-21	55	4	4.59155	Less than 5	F			10	1	1	4	99	17	17	17	17			108	108	108	108	0.27	-0.14	14.6	Normal weight	-0.48
909	498	ACRG	2067045	2007-03-22	2009-08-23	29	2	2.41941	Less than 5	F			40	1	0	0	99	12.4	12.3	12.4	12.37			86	86.2	86.1	86.1	-1.11	-0.1	16.7	Normal weight	0.82
910	517	YCSS	C217022	2005-01-23	2009-08-25	55	4	4.58881	Less than 5	F			22	1	1	4	99	17.3	17.3	17.3	17.3			108.8	108.8	108.8	108.8	0.45	-0.02	14.6	Normal weight	-0.45
911	518	MVSM		2005-03-21	2009-08-25	53	4	4.42763	Less than 5	F			34	1	1	4	99	20	20	20	20			102.5	102.5	102.5	102.5	-0.71	1.1	19	Obesity	2.2
912	520	MPP	2027085	2004-11-10	2009-08-27	58	4	4.79658	Less than 5	F			40	1	1	5	99	18.8	18.8	18.8	18.8			107.5	107.5	107.5	107.5	-0.13	0.38	16.3	Normal weight	0.65
913	526	YBB	C263571	2005-09-18	2009-08-27	47	3	3.94132	Less than 5	F			40	1	0	0	99	18.1	18.1	18.1	18.1			100	100	100	100	-0.54	0.9	18.1	Overweight	1.78
914	529	MMS	I455683	2006-03-20	2009-08-27	41	3	3.43584	Less than 5	F			4	1	0	0	99	12.25	12.25	12.25	12.25			90.5	90.4	90.5	90.47	-2.01	-1.48	15	Normal weight	-0.27
915	534	CST	2057206	2006-08-05	2009-08-27	37	3	3.06027	Less than 5	F			12	1	1	9	99	13.3	13.35	13.35	13.33			91.5	91.5	91.5	91.5	-1.06	-0.37	15.9	Normal weight	0.4
916	541	ESG	2073458	2007-08-08	2009-08-28	25	2	2.05479	Less than 5	F			38	1	1	8	99	13.25	13.25	13.3	13.27			92	92.1	92.1	92.07	1.77	1.05	15.7	Normal weight	-0.01
917	549	BSS	G401531	2006-06-28	2009-08-30	38	3	3.17215	Less than 5	F			40	1	0	0	99	14.45	14.5	14.5	14.48			95	95.1	95	95.03	-0.37	0.13	16	Normal weight	0.49
918	554	JRM	2034406	2005-04-14	2009-08-30	53	4	4.37717	Less than 5	F			22	1	1	4	99	18.45	18.5	18.5	18.48			104.1	104.3	104.1	104.17	-0.26	0.62	17	Overweight	1.13
919	566	PGS	E456248	2005-08-05	2009-08-31	49	4	4.07123	Less than 5	F			40	1	0	0	99	15.8	15.75	15.75	15.77			100.7	100.8	100.7	100.73	-0.58	-0.2	15.5	Normal weight	0.2
920	571	MADC		2006-10-16	2009-09-01	35	2	2.87557	Less than 5	F			34	1	1	9	99	12.1	12.05	12.1	12.08			89.7	89.8	89.8	89.77	-1.14	-0.93	15	Normal weight	-0.34
921	587	AMFA	2031071	2005-02-11	2009-09-29	56	4	4.63265	Less than 5	F			34	1	1	4	99	17.5	17.55	17.55	17.53			107	106.8	106.8	106.87	-0.04	0.04	15.3	Normal weight	0.06
922	588	YVAO	2054871	2006-06-13	2009-09-29	40	3	3.29384	Less than 5	F			40	1	1	8	99	12.95	12.3	12.3	12.52			100	100	99.8	99.93	0.62	-1.15	12.5	Thinness	-2.46
923	603	MESGS	2064774	2007-02-03	2009-10-01	32	2	2.66119	Less than 5	F			31	3	1	9	99	14.85	14.9	14.9	14.88			93.8	93.9	93.8	93.83	0.47	1	16.9	Overweight	1.01
924	606	MMC	C369158	2007-10-05	2009-10-02	24	2	1.99178	Less than 5	F			40	1	1	9	99	9.75	9.7	9.7	9.72			79.5	79.4	79.4	79.43	-2.15	-1.36	15.4	Normal weight	0
925	622	MÊS	2092914	2006-10-19	2009-10-04	36	3	2.9589	Less than 5	F			40	1	1	4	99	16	16.05	16	16.02			99	99.1	99.1	99.05	1.14	1.15	16.3	Normal weight	0.67
926	624	GCS	E362261	2007-06-23	2009-10-04	27	2	2.28128	Less than 5	F			40	1	1	10	99	11.45	11.45	11.45	11.45			86.1	86.2	86.1	86.13	-0.73	-0.5	15.4	Normal weight	-0.12
927	625	KGL	207693	2007-06-08	2009-10-04	28	2	2.32237	Less than 5	F			13	3	0	0	99	13.3	13.3	13.35	13.32			88.5	88.5	88.6	88.53	-0.14	0.64	17	Overweight	1
928	630	LCS	2030919	2005-02-07	2009-10-04	56	4	4.65845	Less than 5	F			22	1	1	5	99	17.4	17.4	17.4	17.4			106.7	106.7	106.6	106.67	-0.11	-0.03	15.3	Normal weight	0.02
929	632	RCO	2065315	2007-02-15	2009-10-04	32	2	2.63653	Less than 5	F			26	1	0	0	99	13.25	13.25	13.3	13.27			94	94.1	94	94.03	0.59	0.15	15	Normal weight	-0.38
930	642	LOC	2026541	2004-10-28	2009-10-05	59	4	4.93699	Less than 5	F			40	1	1	6	99	20.3	20.35	20.35	20.33			105.3	105.3	105.3	105.3	-0.79	0.78	18.3	Overweight	1.78
931	644	MCS	2055257	2006-06-23	2009-10-05	39	3	3.28402	Less than 5	F			40	1	1	9	99	12.5	12.5	12.55	12.52			94.5	94.5	94.4	94.47	-0.73	-1.14	14	Normal weight	-1.06
932	646	SSM	2070885	2007-05-20	2009-10-05	29	2	2.37557	Less than 5	F			40	1	1	8	99	12.25	12.25	12.3	12.27			90.5	90.4	90.4	90.43	0.26	-0.1	15	Normal weight	-0.44
933	647	LRS	2027922	2004-11-27	2009-10-05	58	4	4.85639	Less than 5	F			22	1	1	5	99	15.05	15.05	15.05	15.05			106.5	106.5	106.6	106.53	-0.42	-1.22	13.3	Normal weight	-1.51
934	653	GVRS	J313366	2006-06-10	2009-10-06	40	3	3.32237	Less than 5	F			22	1	1	9	99	13.2	13.25	13.2	13.22			100.05	100.05	100.05	100.05	0.6	-0.75	13.2	Normal weight	-1.79
935	655	JSM	2053575	2006-05-20	2009-10-08	41	3	3.38379	Less than 5	F			22	1	1	8	99	12.4	12.35	12.35	12.37			94	93.9	93.9	93.93	-1.06	-1.35	14	Normal weight	-1.05
936	659	ACS	A234785	2004-12-19	2009-10-08	58	4	4.8032	Less than 5	F			34	1	1	5	99	17.3	17.3	17.3	17.3			103.9	103.9	104	103.93	-0.91	-0.2	16	Normal weight	0.49
937	662	ABNF	2031049	2005-02-10	2009-10-08	56	4	4.66119	Less than 5	F			22	1	0	0	99	16.65	16.6	16.6	16.62			104.3	104.4	104.5	104.4	-0.61	-0.36	15.2	Normal weight	-0.01
938	668	CSP	2065340	2007-02-16	2009-10-09	32	2	2.64749	Less than 5	F			11	1	1	9	99	17.65	17.7	17.7	17.68			97	97.1	97.1	97.07	1.4	2.29	18.8	Obesity	2.15
939	687	ACO	2047542	2006-01-15	2009-10-11	45	3	3.73904	Less than 5	F			22	2	1	8	99	15.15	15.15	15.2	15.17			98	98.1	98	98.03	-0.67	-0.16	15.8	Normal weight	0.36
940	692	ILC	2040116	2005-08-05	2009-10-12	50	4	4.18584	Less than 5	F			22	2	0	0	99	15.85	15.85	15.9	15.87			104.1	104.2	104.2	104.17	0.03	-0.27	14.6	Normal weight	-0.46
941	693	TSB	2087907	2005-08-17	2009-10-12	50	4	4.15297	Less than 5	F			22	1	1	9	99	14.85	14.85	14.9	14.87			100.5	100.4	100.4	100.43	-0.77	-0.71	14.7	Normal weight	-0.37
942	696	CP	2061825	2006-02-23	2009-10-12	44	3	3.63653	Less than 5	F			22	1	1	4	99	18.45	18.5	18.5	18.48			102.5	102.4	102.5	102.47	0.58	1.37	17.6	Overweight	1.51
943	698	KJO	2070497	2007-06-02	2009-10-12	28	2	2.36073	Less than 5	F			40	1	1	9	99	13.1	13.15	13.15	13.13			86.1	86.2	86.1	86.13	-0.94	0.47	17.7	Overweight	1.46
944	708	AGAS	E311345	2006-11-01	2009-10-15	35	2	2.95502	Less than 5	F			3	1	1	9	99	11.05	11.1	11.1	11.08			93.1	93.1	93.1	93.1	-0.41	-1.73	12.8	Thinness	-2.31
945	712	GMS	2029890	2005-01-12	2009-10-15	57	4	4.75822	Less than 5	F			22	1	1	6	99	23.3	23.35	23.35	23.33			113.5	113.5	113.6	113.53	1.22	1.8	18.1	Overweight	1.68
946	714	FDB	2041241	2005-07-30	2009-10-15	51	4	4.2089	Less than 5	F			22	1	1	4	99	16.8	16.8	16.85	16.82			101.5	101.5	101.6	101.53	-0.61	0.12	16.3	Normal weight	0.71
947	721	EPO	F425522	2007-09-20	2009-10-15	25	2	2.06963	Less than 5	F			22	1	0	0	99	14.25	14.25	14.3	14.27			91.5	91.6	91.6	91.57	1.57	1.58	17	Normal weight	0.96
948	725	TO	2038474	2005-07-04	2009-10-16	51	4	4.28288	Less than 5	F			22	1	1	6	99	17.1	17.05	17.05	17.07			102.5	102.6	102.5	102.53	-0.49	0.16	16.2	Normal weight	0.66
949	729	ISFT	2038132	2005-06-26	2009-10-16	52	4	4.30594	Less than 5	F			40	1	1	5	99	14.05	14.05	14.1	14.07			97.3	97.5	97.3	97.37	-1.69	-1.26	14.8	Normal weight	-0.29
950	739	YBS	2059397	2006-09-24	2009-10-19	37	3	3.06963	Less than 5	F			22	1	0	0	99	16.85	16.85	16.9	16.87			100	100	100	100	1.14	1.39	16.9	Overweight	1.05
951	746	SSS	J431592	2006-02-21	2009-10-20	44	3	3.66393	Less than 5	F			40	1	1	9	99	14	14	14.05	14.02			95	95	95	95	-1.27	-0.67	15.5	Normal weight	0.18
952	768	ACSS	J381890	2007-10-22	2009-10-22	24	2	2	Less than 5	F			38	1	1	4	99	11.75	11.7	11.7	11.72			84.1	84	84	84.03	-0.53	0.17	16.6	Normal weight	0.66
953	777	KVMS	2066024	2007-03-01	2009-10-26	32	2	2.65183	Less than 5	F			22	1	1	10	99	11.1	11.15	11.1	11.12			89.8	89.9	89.8	89.83	-0.63	-1.31	13.8	Normal weight	-1.42
954	779	MESS	A448636	2005-03-04	2009-10-26	56	4	4.64361	Less than 5	F			22	3	1	4	99	19.45	19.5	19.5	19.48			113.5	113.4	113.5	113.47	1.37	0.74	15.1	Normal weight	-0.09
955	780	GAAP	2031512	2005-01-28	2009-10-26	57	4	4.74452	Less than 5	F			40	1	1	9	99	12.85	12.9	12.9	12.88			97.8	97.9	97.9	97.87	-2.13	-2.29	13.4	Normal weight	-1.36
958	787	GLS	K397395	2005-04-25	2009-10-26	54	4	4.50274	Less than 5	F			40	1	1	9	99	15.95	15.95	16	15.97			102.3	102.2	102.2	102.23	-0.87	-0.51	15.3	Normal weight	0.02
959	788	LSB	I459315	2006-03-06	2009-10-26	44	3	3.63813	Less than 5	F			40	3	1	5	99	18.25	18.3	18.3	18.28			100.5	100.5	100.6	100.53	0.1	1.29	18.1	Overweight	1.8
960	804	RFSM	E283255	2005-08-24	2009-10-30	50	4	4.18311	Less than 5	F			35	1	1	9	99	17.15	17.2	17.2	17.18			100	100.1	100.1	100.07	-0.9	0.3	17.2	Overweight	1.22
961	806	LGSS	H463528	2006-02-13	2009-10-30	45	3	3.71324	Less than 5	F			22	1	0	0	99	15.1	15.15	15.2	15.15			100	100	100.1	100.03	-0.14	-0.14	15.1	Normal weight	-0.11
962	811	NRS	2027095	2004-11-10	2009-11-05	60	5	4.9863	Less than 5	F			22	2	1	8	99	29.25	29.3	29.3	29.28			118.5	118.6	118.6	118.57	1.94	2.96	20.8	Obesity	2.91
963	813	ASO	2036537	2005-05-25	2009-11-06	53	4	4.44795	Less than 5	F			3	1	0	0	99	13.05	13.05	13.05	13.05			101.7	101.8	101.7	101.73	-0.91	-1.95	12.6	Thinness	-2.12
964	814	TAO	D247317	2004-11-19	2009-11-06	60	5	4.96438	Less than 5	F			40	1	1	6	99	14.9	14.95	14.9	14.92			102.5	102.6	102.5	102.53	-1.41	-1.37	14.2	Normal weight	-0.77
965	817	GMM	K258666	2005-09-18	2009-11-06	50	4	4.13379	Less than 5	F			40	1	0	0	99	14.25	14.2	14.25	14.23			96.3	96.3	96.4	96.33	-1.68	-1.02	15.3	Normal weight	0.06
966	821	MEB	2053738	2006-05-23	2009-11-09	42	3	3.46164	Less than 5	F			1	1	1	9	99	14.3	14.3	14.35	14.32			99	99	99	99	0.05	-0.3	14.6	Normal weight	-0.54
967	824	KBB	2057837	2006-01-12	2009-11-09	46	3	3.82511	Less than 5	F			35	1	0	0	99	17.25	17.3	17.3	17.28			101	101.3	101	101.1	-0.09	0.69	16.9	Overweight	1.09
968	827	NLR	J464756	2005-04-19	2009-11-09	55	4	4.55594	Less than 5	F			22	1	0	0	99	16	16.06	16.05	16.04			100	100.1	100.1	100.07	-1.42	-0.52	16	Normal weight	0.5
969	830	EGLS	2044921	2005-11-12	2009-11-09	48	4	3.99178	Less than 5	F			12	1	1	4	99	20.8	20.85	20.85	20.83			107	107	107.1	107.03	1.01	1.8	18.2	Overweight	1.82
970	832	ERM	K329573	2006-08-01	2009-11-09	39	3	3.27192	Less than 5	F			22	1	1	10	99	16.95	16.95	17	16.97			96.2	96.2	96.1	96.17	-0.28	1.18	18.3	Overweight	1.96
971	837	KSS	2050938	2006-03-28	2009-11-12	44	3	3.62283	Less than 5	F			22	1	1	9	99	14.6	14.65	14.65	14.63			99.5	99.6	99.6	99.57	-0.11	-0.31	14.8	Normal weight	-0.41
972	838	LMA	2063807	2007-01-09	2009-11-12	34	2	2.84155	Less than 5	F			40	1	0	0	99	12.85	12.9	12.9	12.88			93	93	93	93	-0.19	-0.37	14.9	Normal weight	-0.43
973	840	BSNS	2064358	2007-01-26	2009-11-12	34	2	2.79498	Less than 5	F			35	1	1	8	99	16.15	16.2	16.2	16.18			96	96.1	96.1	96.07	0.74	1.44	17.5	Overweight	1.44
974	859	GARP		2006-12-11	2009-11-16	35	2	2.93037	Less than 5	F			3	1	1	9	99	13.55	13.6	13.55	13.57			94.5	94.6	94.6	94.57	0.02	-0.07	15.2	Normal weight	-0.18
975	869	LCS	I288654	2005-12-24	2009-11-16	47	3	3.89475	Less than 5	F			22	2	1	9	99	15.2	15.25	15.2	15.22			101.5	101.6	101.6	101.57	-0.1	-0.29	14.8	Normal weight	-0.38
976	873	NSP	2062941	2006-12-16	2009-11-17	35	2	2.91941	Less than 5	F			6	1	1	7	99	13.55	13.6	13.6	13.58			95	95.1	95.1	95.07	0.18	-0.05	15	Normal weight	-0.3
977	881	LIAS	A379898	2007-08-28	2009-11-21	27	2	2.23082	Less than 5	F			22	1	1	9	99	14.25	14.3	14.3	14.28			93	93	93.1	93.03	1.45	1.32	16.5	Normal weight	0.65
978	883	LSO	2099903	2006-10-19	2009-11-21	37	3	3.08881	Less than 5	F			32	1	1	10	99	14.7	14.75	14.75	14.73			94	94	94.1	94.03	-0.46	0.36	16.7	Normal weight	0.91
979	902	KCM	E400840	2007-03-08	2009-11-23	33	2	2.70776	Less than 5	F			22	3	1	10	99	11.9	11.95	11.95	11.93			90	90.1	90.1	90.07	-0.69	-0.81	14.7	Normal weight	-0.61
980	928	LA	2066044	2007-03-02	2009-11-20	33	2	2.71598	Less than 5	F			38	1	0	0	99	14.35	14.35	14.4	14.37			91.5	91.6	91.5	91.53	-0.31	0.65	17.2	Overweight	1.19
981	929	IGES	2053604	2005-10-13	2009-11-29	50	4	4.12717	Less than 5	F			35	1	1	10	99	16.25	16.3	16.3	16.28			100	100	100.1	100.03	-0.83	-0.03	16.3	Normal weight	0.68
982	930	RBF	I295385	2005-04-20	2009-11-30	55	4	4.61073	Less than 5	F			35	1	1	8	99	23.55	23.6	23.6	23.58			112.1	112	112	112.03	1.11	1.99	18.8	Obesity	2.05
983	944	NRGA		2007-02-27	2009-12-03	33	2	2.76758	Less than 5	F			22	1	0	0	99	17	17.05	17	17.02			97	97.1	97.1	97.07	1.09	1.85	18.1	Overweight	1.76
984	945	EBL	2060707	2006-10-25	2009-12-03	37	3	3.10639	Less than 5	F			22	1	1	9	99	13.8	13.85	13.85	13.83			94.5	94.5	94.6	94.53	-0.36	-0.15	15.5	Normal weight	0.08
985	946	IBC	I359610	2006-06-30	2009-12-03	41	3	3.42603	Less than 5	F			22	1	1	9	99	11.1	11.15	11.15	11.13			92	92.1	92.1	92.07	-1.59	-2.25	13.1	Normal weight	-1.84
986	947	MSM	F274857	2005-09-19	2009-12-03	50	4	4.20616	Less than 5	F			22	1	1	9	99	15.15	15.2	15.2	15.18			99.5	99.4	99.5	99.47	-1.07	-0.61	15.3	Normal weight	0.06
987	949	LSR	I279057	2005-10-12	2009-12-03	50	4	4.14201	Less than 5	F			22	1	1	10	99	16	16	16.05	16.02			105	105.1	105	105.03	0.3	-0.16	14.5	Normal weight	-0.54
988	950	VBN	2044279	2005-04-06	2009-12-04	56	4	4.66119	Less than 5	F			40	1	1	6	99	25	25.05	25	25.02			105	105	105.1	105.03	-0.48	2.31	22.7	Obesity	3.8
989	956	MCAP	E313225	2006-04-16	2009-12-04	44	3	3.63379	Less than 5	F			40	3	0	0	99	23.85	23.85	23.9	23.87			109	109.1	109	109.03	2.17	3.08	20.1	Obesity	2.83
990	961	TAB	207577	2007-11-02	2009-12-05	25	2	2.09155	Less than 5	F			40	1	0	0	99	12.15	12.2	12.2	12.18			87	87	87.1	87.03	0.11	0.32	16.1	Normal weight	0.31
991	966	BMP	2039416	2005-07-22	2009-12-05	53	4	4.37009	Less than 5	F			40	3	1	9	99	18.6	18.6	18.65	18.62			105.4	105.5	105.4	105.43	0.03	0.68	16.8	Normal weight	0.97
992	970	LDF	2043790	2005-10-18	2009-12-05	50	4	4.13105	Less than 5	F			11	1	1	6	99	21.1	21.15	21.1	21.12			101.5	101.5	101.4	101.47	-0.5	1.75	20.5	Obesity	2.94
993	975	SSS	2032050	2005-03-02	2009-12-14	57	4	4.78288	Less than 5	F			40	1	1	4	99	19.85	19.9	19.9	19.88			110.2	110.3	110.1	110.2	0.46	0.75	16.4	Normal weight	0.71
994	976	MSMP	C479334	2007-09-01	2009-12-14	27	2	2.28562	Less than 5	F			11	1	1	6	99	13.05	13.05	13	13.03			92	92	92.1	92.03	1	0.53	15.4	Normal weight	-0.16
995	978	SSHSS	219526	2005-04-20	2009-12-14	56	4	4.65023	Less than 5	F			35	1	1	6	99	20	20	20	20			110	110.3	110.2	110.17	0.65	0.91	16.5	Normal weight	0.78
996	982	IKP	2086558	2004-07-13	2009-05-02	58	4	4.8032	Less than 5	F			40	1	1	4	99	17.8	17.85	17.85	17.83			115	114.9	114.9	114.93	1.45	0.01	13.5	Normal weight	-1.31
997	984	RSS	2076847	2006-02-15	2009-07-25	41	3	3.44406	Less than 5	F			40	1	1	10	99	12.65	12.65	12.7	12.67			93	93	93.1	93.03	-1.37	-1.22	14.6	Normal weight	-0.52
998	989	LFC	I223037	2005-02-12	2009-09-04	55	4	4.56142	Less than 5	F			35	1	1	4	99	17.9	17.95	17.95	17.93			109.8	109.9	109.8	109.83	0.72	0.25	14.9	Normal weight	-0.27
999	991	SCA	2048588	2006-02-08	2009-10-27	45	3	3.71872	Less than 5	F			40	1	1	8	99	19.4	19.45	19.45	19.43			103.2	103.3	103.3	103.27	0.62	1.62	18.2	Overweight	1.86
1000	992	YAM	2070782	2005-01-16	2009-10-28	57	4	4.78288	Less than 5	F			40	1	1	6	99	15.1	15.1	15.1	15.1			99.8	99.8	99.8	99.8	-1.76	-1.14	15.2	Normal weight	-0.07
1001	997	EAS		2004-12-12	2009-12-03	60	5	4.97534	Less than 5	F			22	1	0	0	5	23.5	23.55	23.55	23.53			111.2	111.2	111.2	111.2	0.41	1.67	19	Obesity	2.11
1	5	MAS	X	2003-01-02	2009-04-24	76	6	6.31027	Between 5 and 13	M	1		10	1	0	0	3	15.85	15.85	15.8	15.83			111	111.1	111.1	111.07	-2.29	-1.33	12.8	Thinness	-2.25
2	6	LFSR	2007483	2003-07-08	2009-04-25	70	5	5.79658	Between 5 and 13	M	1		10	1	1	5	6	18.1	18.1	18.15	18.12			115	115.1	115	115.03	-0.78	0.06	13.7	Normal weight	-1.34
3	13	JVDG	X	2002-05-04	2009-04-25	84	7	6.9742	Between 5 and 13	M	1		10	1	1	6	3	20	20.1	20	20.03			119	119.1	119.1	119.07	-0.98	-0.48	14.1	Normal weight	-1.07
4	40	GOM	E29392	2001-12-22	2009-04-26	88	7	7.34429	Between 5 and 13	M	1		35	1	1	5	6	24.7	24.75	24.75	24.73			123.5	123.6	123.6	123.57	0.29	-0.02	16.2	Normal weight	0.42
5	43	LSSS	2023340J	2001-10-29	2009-04-26	90	7	7.49178	Between 5 and 13	M	1		40	1	1	5	5	43.15	43.1	43.1	43.12			136	136	136.1	136.03	3.74	2.11	23.3	Obesity	3.41
6	44	KHO	2042272	2002-12-13	2009-04-26	76	6	6.36895	Between 5 and 13	M	1		22	1	1	4	2	22.8	22.8	22.8	22.8			119	119	119	119	0.47	0.18	16.1	Normal weight	0.52
7	50	CHLS	H439317	2003-01-21	2009-04-27	75	6	6.26644	Between 5 and 13	M	1		22	1	1	4	6	32.9	32.9	32.95	32.92			133	133	133	133	3.06	3.09	18.6	Overweight	1.99
8	51	GBB	112471E	1997-08-08	2009-04-27	141	11	11.7187	Between 5 and 13	M	1		40	1	1	4	3	37.3	37.3	37.35	37.32			145	145.1	145.1	145.07		-0.32	17.7	Normal weight	0.19
10	65	JLDO	J439518	1996-09-23	2009-04-28	151	12	12.597	Between 5 and 13	M	1		19	1	1	5	2	33.4	33.4	33.45	33.42			146	146.1	146.1	146.07		-0.96	15.7	Normal weight	-1.3
11	67	HRT	19187B	1997-11-05	2009-04-28	138	11	11.4797	Between 5 and 13	M	1		11	1	1	4	4	54.6	54.6	54.65	54.62			149.5	149.6	149.6	149.57		0.54	24.4	Obesity	2.3
12	73	RCS	D111712	2003-02-02	2009-04-28	75	6	6.2379	Between 5 and 13	M	1		6	1	1	4	6	21.95	21.95	21.95	21.95			116	116.1	116.1	116.07	0.31	-0.25	16.3	Normal weight	0.67
13	80	CRL	C197018	2002-11-21	2009-04-28	77	6	6.43584	Between 5 and 13	M	1		22	1	1	5	2	21.2	21.2	21.2	21.2			127	127.1	127	127.03	-0.11	1.68	13.1	Normal weight	-1.94
14	90	TSA	2007782	2003-07-16	2009-04-29	70	5	5.78562	Between 5 and 13	M	1		40	1	1	6	6	21.8	21.85	21.8	21.82			120	120.1	120.1	120.07	0.64	1.11	15.1	Normal weight	-0.11
15	91	GTSV	891270	2001-10-29	2009-04-29	90	7	7.5	Between 5 and 13	M	1		40	1	1	5	2	23.95	23.9	23.9	23.92			127.5	127.6	127.5	127.53	-0.06	0.55	14.7	Normal weight	-0.66
16	92	DRM	871631	2000-06-23	2009-04-29	106	8	8.84977	Between 5 and 13	M	1		35	2	1	5	3	31.9	31.95	31.95	31.93			128	128.1	128.1	128.07	0.9	-0.62	19.5	Overweight	1.69
17	94	VAC	B145022	2002-12-28	2009-04-29	76	6	6.33607	Between 5 and 13	M	1		35	1	1	6	4	38.2	38.25	38.2	38.22			129.5	129.6	129.6	129.57	4.12	2.31	22.8	Obesity	3.79
18	99	PBA	2104636	2001-01-19	2009-05-19	100	8	8.33333	Between 5 and 13	M	1		12	1	1	6	4	33	33.05	33.05	33.03			125	125.1	125.2	125.1	1.47	-0.68	21.1	Obesity	2.4
19	107	NLLS	2005761	2003-05-30	2009-05-21	72	6	5.97534	Between 5 and 13	M	1		6	1	1	6	6	22.05	22.1	22.1	22.08			128.5	128.5	129	128.67	0.56	2.61	13.3	Normal weight	-1.7
20	108	KCO	2040887	2001-07-17	2009-05-21	94	7	7.84429	Between 5 and 13	M	1		40	1	1	6	99	17.85	17.8	17.85	17.83			100	100	100	100	-2.61	-4.73	17.8	Overweight	1.23
21	110	MPS	905296	2002-12-14	2009-05-21	77	6	6.43584	Between 5 and 13	M	1		35	1	1	5	2	25.7	25.75	25.7	25.72			112	122.1	122	118.7	1.27	0.04	18.3	Overweight	1.77
22	111	MVTS	K31686	2002-01-25	2009-05-21	88	7	7.32237	Between 5 and 13	M	1		22	1	1	10	3	18.85	18.85	18.9	18.87			129	129	128.5	128.83	-1.72	0.98	11.4	Thinness	-4.03
23	112	CAAS	B442550	2001-09-17	2009-05-21	92	7	7.67763	Between 5 and 13	M	1		2	1	1	5	3	23.35	23.35	23.4	23.37			123.5	123.4	123.5	123.467	-0.36		15.3	Normal weight	-0.28
24	115	OSS	2008309	2003-07-29	2009-05-22	70	5	5.81416	Between 5 and 13	M	1		40	1	1	6	2	18.05	18.05	18	18.03			107.5	108	108	107.83	-0.83	-1.44	15.5	Normal weight	0.17
25	122	LRA	G442645	2003-06-22	2009-05-22	71	5	5.91667	Between 5 and 13	M	1		17	1	1	6	2	17.5	17.55	17.55	17.53			110.4	110.5	110.5	110.47	-1.13	-1.02	14.4	Normal weight	-0.75
26	125	LFM	2010436	2003-09-19	2009-05-22	68	5	5.67489	Between 5 and 13	M	1		40	1	1	6	3	24.85	24.85	24.85	24.85			111	110.5	111	110.83	1.67	-0.65	20.2	Obesity	2.9
27	132	LSP	2053728	1998-01-03	2009-05-23	137	11	11.3881	Between 5 and 13	M	1		35	1	1	6	3	32.7	32.75	32.7	32.72			156.5	156.4	156.5	156.47		1.63	13.4	Thinness	-2.8
28	136	FDS	B411035	2004-04-27	2009-05-23	61	5	5.07237	Between 5 and 13	M	1		40	1	0	0	6	18.7	18.75	18.75	18.73			106.5	106.3	106.5	106.43	0.1	-0.86	16.5	Normal weight	0.95
29	147	CSA	B107705	2001-06-28	2009-05-24	95	7	7.90571	Between 5 and 13	M	1		40	1	1	8	1	19.2	19.2	19.25	19.22			118	118.1	118.1	118.07	-2.03	-1.55	13.8	Normal weight	-1.52
30	148	GSS	907787	2003-02-15	2009-05-24	75	6	6.27466	Between 5 and 13	M	1		22	1	1	6	6	19.75	19.75	19.75	19.75			119.5	119.5	119.6	119.53	-0.51	0.4	13.8	Normal weight	-1.26
31	149	MFS	E76840	2002-11-21	2009-05-24	78	6	6.50822	Between 5 and 13	M	1		35	1	1	6	6	25.7	25.75	25.7	25.72			126	126	126.1	126.03	1.22	1.4	16.2	Normal weight	0.56
32	151	TKRK	2078021	1998-11-13	2009-05-24	126	10	10.5301	Between 5 and 13	M	1		40	1	1	6	2	30	30.05	30.05	30.03			132.1	132.2	132.2	132.17		-1.28	17.2	Normal weight	0.26
33	152	ICVA	G442905	2004-04-17	2009-05-24	61	5	5.10251	Between 5 and 13	M	1		40	1	1	6	6	22	22	22	22			117.4	117.5	117.5	117.47	1.29	1.54	15.9	Normal weight	0.51
34	159	EFJL	B443136	1997-09-08	2009-05-25	141	11	11.7132	Between 5 and 13	M	1		6	1	1	9	4	41.9	41.95	41.95	41.93			151	151.1	151.1	151.07		0.55	18.4	Normal weight	0.48
35	164	NSNF	2012697	2001-03-21	2009-05-26	98	8	8.18037	Between 5 and 13	M	1		40	1	1	6	3	27.45	27.45	27.45	27.45			131.8	131.8	131.6	131.73	0.4	0.61	15.8	Normal weight	0.02
36	166	ULS	110914	1997-01-07	2009-05-26	149	12	12.3854	Between 5 and 13	M	1		22	1	1	6	3	53.8	53.8	53.85	53.82			164.7	164.5	164.5	164.57		1.79	19.9	Normal weight	0.86
37	167	HNN	J1800460	1999-12-02	2009-05-26	114	9	9.48242	Between 5 and 13	M	1		40	1	1	6	5	53.95	53.95	53.95	53.95			141.7	141.7	141.5	141.63	3.2	1.06	26.9	Obesity	3.42
38	171	FPN		2001-07-20	2009-05-28	94	7	7.85525	Between 5 and 13	M	1		38	1	1	6	3	22.3	22.3	22.3	22.3			123.5	123.5	123.4	123.47	-0.84	-0.54	14.6	Normal weight	-0.78
39	174	MMS	2034611	2004-04-19	2009-05-28	61	5	5.10799	Between 5 and 13	M	1		12	1	1	4	6	17.95	17.95	17.95	17.95			109	109.1	109.1	109.07	-0.26	-0.29	15.1	Normal weight	-0.14
40	181	GSB	2004763	2003-02-23	2009-05-29	75	6	6.26644	Between 5 and 13	M	1		35	1	1	5	3	18.1	18.1	18.15	18.12			113.1	113.1	113	113.07	-1.17	-0.88	14.2	Normal weight	-0.94
41	192	GLF	2085160	2001-07-15	2009-06-02	95	7	7.88105	Between 5 and 13	M	1		40	3	1	9	4	38.2	38.25	38.2	38.22			134	133.9	134	133.97	2.64	1.31	21.3	Obesity	2.6
42	197	BSF	22243	1999-09-14	2009-06-02	117	9	9.71712	Between 5 and 13	M	1		12	1	1	4	4	44.5	44.5	44.5	44.5			141	141.1	141	141.03	2.13	0.75	22.4	Obesity	2.34
43	202	PRS	2006577	2003-05-11	2009-06-04	73	6	6.06416	Between 5 and 13	M	1		22	1	1	6	4	20.35	20.3	20.35	20.33			116.5	116.5	116.4	116.47	-0.12	0.02	15	Normal weight	-0.25
44	210	GNE	E370144	2001-12-14	2009-06-04	90	7	7.4726	Between 5 and 13	M	1		6	1	1	5	2	23.85	23.85	23.85	23.85			122.1	122.1	122	122.07	-0.06	-0.42	16	Normal weight	0.28
45	220	EAG	879699	1999-07-06	2009-06-06	119	9	9.91667	Between 5 and 13	M	1		6	1	1	5	5	51.1	51.1	51.1	51.1			147.1	147	147	147.03	2.63	1.52	23.6	Obesity	2.57
46	228	BNS	8753	2000-09-25	2009-06-06	104	8	8.69795	Between 5 and 13	M	1		40	1	1	5	4	31.15	61.15	61.15	51.15			131.8	131.8	131.8	131.8	3.63	0.14	29.4	Obesity	4.57
47	234	LBC	886166	2001-02-04	2009-06-06	100	8	8.33881	Between 5 and 13	M	1		40	1	1	4	4	58.1	58.1	58.1	58.1			139.5	139.4	139.5	139.47	4.96	1.81	29.9	Obesity	4.99
48	235	RZM	J411860	2003-04-10	2009-06-06	74	6	6.15571	Between 5 and 13	M	1		40	1	1	6	2	16.95	16.95	16.9	16.93			97.1	97.2	97.2	97.17	-1.62	-3.96	17.9	Overweight	1.66
49	240	JLM	J369984	2002-10-30	2009-06-06	79	6	6.60091	Between 5 and 13	M	1		22	1	1	5	2	19.35	19.3	19.3	19.32			112.3	112.4	112.3	112.33	-0.95	-1.39	15.3	Normal weight	-0.07
50	252	APF	E100608	2001-06-04	2009-06-09	96	8	8.0137	Between 5 and 13	M	1		40	1	1	5	3	24	24	24	24			127.2	127.2	127.4	127.27	-0.42	-0.01	14.8	Normal weight	-0.66
51	268	GMS	2000013	2001-08-17	2009-06-12	94	7	7.81963	Between 5 and 13	M	1		40	2	1	5	3	27.6	27.6	27.6	27.6			131.1	131	131	131.03	0.69	0.85	16.1	Normal weight	0.26
52	270	ISM	907173	2003-02-26	2009-06-13	76	6	6.29772	Between 5 and 13	M	1		22	1	1	4	3	24.1	24.15	24.15	24.13			118.8	118.9	118.8	118.83	0.94	0.23	17.1	Overweight	1.15
53	273	CAF	D113421	2003-04-30	2009-06-13	74	6	6.12009	Between 5 and 13	M	1		10	1	1	6	6	17.15	17.15	17.15	17.15			106.1	106	106	106.03	-1.48	-2.14	15.3	Normal weight	-0.05
54	284	PVSO	125144	2001-11-05	2009-06-16	91	7	7.61347	Between 5 and 13	M	1		40	1	1	5	3	24.55	24.55	24.5	24.53			123.2	123.1	123.2	123.17	0.03	-0.36	16.2	Normal weight	0.35
55	285	CSS	37104	2000-04-29	2009-06-16	110	9	9.13105	Between 5 and 13	M	1		12	1	1	5	4	28.95	28.9	28.95	28.93			134.3	134.4	134.3	134.33	0.1	0.18	16	Normal weight	-0.04
56	292	JOB	17316	1998-02-24	2009-06-18	136	11	11.3169	Between 5 and 13	M	1		10	1	1	4	2	36.9	36.9	36.9	36.9			149	149.1	149	149.03		0.61	16.6	Normal weight	-0.27
57	295	ALC	A168399	2003-03-24	2009-06-18	75	6	6.23356	Between 5 and 13	M	1		35	1	1	6	4	22.8	22.8	22.8	22.8			117	116.9	117	116.97	0.58	-0.07	16.7	Normal weight	0.91
58	296	MLS	122257	2001-04-13	2009-06-18	98	8	8.18037	Between 5 and 13	M	1		40	1	1	4	2	22.4	22.4	22.4	22.4			124.5	124.4	124.5	124.47	-1.04	-0.66	14.5	Normal weight	-0.98
59	297	GFAC	848146	1997-12-23	2009-06-21	138	11	11.4945	Between 5 and 13	M	1		40	1	1	5	5	67.8	67.8	67.85	67.82			148.5	148.6	148.6	148.57		0.38	30.7	Obesity	3.29
60	299	MDS	2019095	2003-01-22	2009-06-21	77	6	6.41393	Between 5 and 13	M	1		22	1	1	5	2	28.1	28.1	28.1	28.1			125.7	125.7	125.5	125.63	1.89	1.43	17.8	Overweight	1.54
61	306	BGM	J400006	2003-05-10	2009-06-22	73	6	6.11621	Between 5 and 13	M	1		35	1	1	5	3	23.25	23.25	23.3	23.27			117.4	117.4	117.5	117.43	0.83	0.16	16.9	Overweight	1.05
62	314	ELRD	123714	1996-01-10	2009-06-23	162	13	13.4523	Between 5 and 13	M	1		40	1	1	6	1	32.5	32.5	35.2	33.4			144.5	144.4	144.5	144.47		-1.97	16	Normal weight	-1.41
63	318	WS	2043236	1996-07-25	2009-06-23	155	12	12.9112	Between 5 and 13	M	1		22	1	1	5	3	39.8	39.85	39.85	39.83			150.5	150.4	150.5	150.47		-0.67	17.6	Normal weight	-0.28
64	319	BER	805584	1997-03-01	2009-06-23	148	12	12.3103	Between 5 and 13	M	1		22	1	1	5	4	36.85	36.85	36.9	36.87			131	131.1	131	131.03		-2.8	21.5	Overweight	1.39
65	322	PTSM	28412	1996-10-15	2009-06-25	152	12	12.6941	Between 5 and 13	M	1		40	1	1	5	2	42.1	42.15	42.1	42.12			169	169	169	169		2.07	14.7	Thinness	-2.03
66	324	KES	E446752	2004-01-03	2009-06-26	66	5	5.47968	Between 5 and 13	M	1		12	1	1	4	3	19.65	19.65	19.65	19.65			115	115.1	115	115.03	0.12	0.48	14.9	Normal weight	-0.33
67	332	VGSB	2020227	2004-05-20	2009-06-30	61	5	5.11073	Between 5 and 13	M	1		10	1	1	4	6	17.85	17.85	17.9	17.87			104.8	104.9	104.8	104.83	-0.29	-1.22	16.3	Normal weight	0.74
68	335	DNC	G67533	2001-06-19	2009-06-30	96	8	8.03014	Between 5 and 13	M	1		32	1	1	5	3	26.75	26.75	26.75	26.75			124.5	124.6	124.5	124.53	0.33	-0.51	17.2	Normal weight	0.89
69	338	BHMV	I447423	1995-12-06	2009-06-30	163	13	13.5658	Between 5 and 13	M	1		16	1	1	6	3	41.85	41.85	41.85	41.85			154.5	154.5	154.6	154.53		-0.74	17.5	Normal weight	-0.55
71	343	MFBS	2007928	2003-07-20	2009-07-02	71	5	5.95068	Between 5 and 13	M	1		41	1	1	6	6	21.4	21.4	21.4	21.4			111.5	111.4	111.5	111.47	0.35	-0.85	17.2	Overweight	1.29
72	344	GBB	2045042	2002-11-16	2009-07-02	80	6	6.62831	Between 5 and 13	M	1		10	1	1	5	99	14.5	14.5	14.5	14.5			99.5	99.6	99.5	99.53	-3.29	-3.9	14.6	Normal weight	-0.59
73	348	RRS	881865	1999-12-01	2009-07-02	115	9	9.58607	Between 5 and 13	M	1		6	1	1	5	2	22.05	22.05	22.05	22.05			124.5	124.4	124.4	124.43	-2.11	-1.8	14.2	Normal weight	-1.44
74	349	DLS	D276767	2001-06-25	2009-07-02	96	8	8.02032	Between 5 and 13	M	1		22	1	1	5	3	33.9	33.9	33.9	33.9			131.1	131.2	131.1	131.13	1.84	0.67	19.7	Obesity	2.01
75	351	GPSV	2008325	2003-02-12	2009-07-02	77	6	6.38927	Between 5 and 13	M	1		22	1	1	4	4	28.65	28.65	28.65	28.65			116.1	116.2	116.1	116.13	2.05	-0.41	21.2	Obesity	3.11
76	352	GALS	2066034	2001-03-18	2009-07-02	100	8	8.2895	Between 5 and 13	M	1		11	1	1	5	4	25.3	25.3	25.3	25.3			128.2	128.1	128.2	128.17	-0.24	-0.11	15.4	Normal weight	-0.28
77	353	JVR	H59941	2002-01-30	2009-07-03	89	7	7.42603	Between 5 and 13	M	1		6	1	1	4	2	28.3	28.3	28.3	28.3			130.5	130.5	130.3	130.43	1.15	1.16	16.6	Normal weight	0.68
78	355	EOFS	H343639	2004-03-17	2009-07-03	64	5	5.29498	Between 5 and 13	M	1		22	1	1	4	6	18.35	18.35	18.35	18.35			108	108.1	108.1	108.07	-0.25	-0.76	15.7	Normal weight	0.34
79	357	RFA	2100881	2002-01-24	2009-07-03	89	7	7.44247	Between 5 and 13	M	1		22	1	1	5	2	23.3	23.3	23.3	23.3			128.5	128.5	128.4	128.47	-0.21	0.78	14.1	Normal weight	-1.14
80	358	LSR	2066073	2002-06-03	2009-07-03	85	7	7.08333	Between 5 and 13	M	1		40	1	1	5	3	20.65	20.65	20.65	20.65			120.5	120.4	120.5	120.47	-0.83	-0.33	14.2	Normal weight	-0.99
81	364	GAL	2014506	2004-01-09	2009-07-04	66	5	5.4863	Between 5 and 13	M	1		38	1	1	6	6	20.15	20.15	20.15	20.15			110.3	110.2	110.3	110.27	0.3	-0.54	16.6	Normal weight	0.93
82	365	RGS	D447894	1998-02-03	2009-07-04	137	11	11.4194	Between 5 and 13	M	1		18	1	1	5	4	54.95	54.95	54.95	54.95			151.5	151.5	151.6	151.53		0.88	23.9	Obesity	2.22
83	367	GJT	12008	1999-03-17	2009-07-04	124	10	10.2977	Between 5 and 13	M	1		40	2	1	5	4	44.25	44.25	44.25	44.25			146.4	146.3	146.4	146.37		1.08	20.7	Overweight	1.7
84	368	LVAB	E447929	1996-03-29	2009-07-04	159	13	13.2648	Between 5 and 13	M	1		6	1	1	5	4	83.7	83.7	83.7	83.7			171	171	171.1	171.03		1.74	28.6	Obesity	2.59
85	369	LAS	C148747	1996-09-01	2009-07-04	154	12	12.8416	Between 5 and 13	M	1		22	1	1	5	3	44.2	44.2	44.2	44.2			146.5	146.5	146.4	146.47		-1.14	20.6	Normal weight	0.98
86	372	LHNS	2065276	2000-07-27	2009-07-06	107	8	8.94247	Between 5 and 13	M	1		40	1	1	9	2	23.65	23.65	23.65	23.65			126.4	126.3	126.4	126.37	-1.16	-0.98	14.8	Normal weight	-0.84
87	373	SPS	G239584	1995-02-02	2000-07-07	65	5	5.43037	Between 5 and 13	M	1		22	1	1	5	2	62.3	62.3	62.3	62.3			179.8	179.8	179.7	179.77	11.55	14.27	19.3	Obesity	2.5
89	379	WRM	2007966	2003-06-07	2009-07-09	73	6	6.08881	Between 5 and 13	M	1		40	1	1	5	3	21.65	21.65	21.65	21.65			118	118	118.1	118.03	0.33	0.31	15.5	Normal weight	0.16
90	382	FSJR	905782	2001-05-19	2009-07-09	98	8	8.13927	Between 5 and 13	M	1		40	1	1	5	3	29.25	29.25	29.25	29.25			128.3	128.4	128.3	128.33	0.84	0.06	17.8	Overweight	1.13
91	384	ESB	G450275	1999-11-17	2009-07-19	116	9	9.67215	Between 5 and 13	M	1		10	3	1	4	2	23.9	23.9	23.9	23.9			122.1	122.1	122	122.07	-1.56	-2.24	16	Normal weight	-0.16
92	387	MHEO	21056	1999-08-11	2009-07-23	119	9	9.94954	Between 5 and 13	M	1		10	1	1	6	2	28.85	28.85	28.85	28.85			133.5	133.5	133.4	133.47	-0.45	-0.64	16.2	Normal weight	-0.13
93	389	WRS	B452509	2001-12-16	2009-08-04	92	7	7.63379	Between 5 and 13	M	1		40	1	1	5	2	23.2	23.2	23.2	23.2			124.3	124.3	124.3	124.3	-0.38	-0.18	15	Normal weight	-0.45
94	393	CIE	A124641	2002-08-31	2009-08-04	83	6	6.92603	Between 5 and 13	M	1		22	3	1	10	3	28	28	28	28			125.5	125.5	125.5	125.5	1.46	0.8	17.8	Overweight	1.42
95	397	VBS	903249	2002-10-07	2009-08-07	82	6	6.83333	Between 5 and 13	M	1		10	1	1	5	3	28.1	28.1	28.1	28.1			133.3	133.2	133.3	133.27	1.55	2.39	15.8	Normal weight	0.26
96	398	PZC	H453078	2004-06-28	2009-08-07	61	5	5.10913	Between 5 and 13	M	1		22	3	1	6	6	16.8	16.8	16.8	16.8			108.1	108.1	108.1	108.1	-0.77	-0.51	14.4	Normal weight	-0.73
97	404	WAD	2020728	2004-06-03	2009-08-10	62	5	5.18584	Between 5 and 13	M	1		32	1	1	5	6	18.05	18.05	18.05	18.05			112	112.1	112	112.03	-0.28	0.24	14.4	Normal weight	-0.72
98	406	JPSD	D210315	2003-07-30	2009-08-10	72	6	6.02854	Between 5 and 13	M	1		40	1	1	5	6	29.4	29.4	29.4	29.4			126.7	126.6	126.7	126.67	2.52	2.13	18.3	Overweight	1.89
99	410	AS	32702	1996-09-04	2009-08-11	155	12	12.9358	Between 5 and 13	M	1		29	1	1	4	5	75.9	75.95	75.9	75.92			170	170.1	170.1	170.07		1.96	26.2	Obesity	2.29
100	411	GSSS	44305	1997-04-17	2009-08-11	148	12	12.3169	Between 5 and 13	M	1		40	1	1	6	4	56	56.05	56	56.02			150.5	150.5	150.5	150.5		-0.09	24.7	Obesity	2.16
101	413	GBB	2105272	2003-12-08	2009-08-11	68	5	5.67489	Between 5 and 13	M	1		12	1	1	8	3	22.05	22.05	22.05	22.05			118.5	118.6	118.5	118.53	0.81	0.94	15.7	Normal weight	0.31
102	427	MVS	27781	1999-09-28	2009-08-13	119	9	9.87557	Between 5 and 13	M	1		12	1	1	5	2	35.05	35.05	35	35.03			143.1	143.2	143.2	143.17	0.77	0.95	17.1	Normal weight	0.38
103	434	AVFL	I26901	2000-12-20	2009-08-16	104	8	8.65571	Between 5 and 13	M	1		40	1	1	6	2	23.1	23.1	23.1	23.1			125.1	125.1	125.2	125.13	-1.14	-0.95	14.8	Normal weight	-0.83
104	437	PHBS	2006800	2003-06-24	2009-08-16	74	6	6.14475	Between 5 and 13	M	1		11	1	1	4	4	36.35	36.35	36.35	36.35			124	123.6	124	123.87	3.93	1.42	23.7	Obesity	4.3
105	441	VZR	F442646	2003-03-03	2009-08-16	78	6	6.45228	Between 5 and 13	M	1		40	3	1	4	3	27.9	27.95	27.9	27.92			127.5	127.5	127.6	127.53	1.81	1.75	17.2	Overweight	1.17
106	448	RRM		2001-04-10	2009-08-17	100	8	8.35251	Between 5 and 13	M	1		25	1	1	4	3	22.75	22.75	22.75	22.75			123.5	123.5	123.4	123.47	-1.05	-0.98	14.9	Normal weight	-0.64
107	449	lcb	G16371	1995-09-18	2009-08-17	167	13	13.9139	Between 5 and 13	M	1		22	1	1	5	3	43.5	43.55	43.5	43.52			158.5	158.6	158.5	158.53		-0.53	17.3	Normal weight	-0.79
108	452	GSL	E249687	2003-02-26	2009-08-17	78	6	6.47534	Between 5 and 13	M	1		40	1	1	4	3	26.8	26.8	26.8	26.8			121.5	121.4	121.5	121.47	1.52	0.54	18.2	Overweight	1.72
109	455	LFS	117571	1998-05-29	2009-08-17	135	11	11.2171	Between 5 and 13	M	1		40	1	1	4	1	22.9	22.9	22.9	22.9			132	132	132.1	132.03		-1.81	13.1	Thinness	-2.98
110	463	JCASJ	9358471	2001-09-17	2009-08-18	95	7	7.91941	Between 5 and 13	M	1		22	1	1	5	3	24.75	24.75	24.75	24.75			137.7	137.5	137.6	137.6	-0.13	1.92	13.1	Thinness	-2.22
111	468	AVSF	2101202	1997-08-18	2009-08-18	144	12	12	Between 5 and 13	M	1		11	1	1	5	3	38.1	38.1	38.1	38.1			155	155	155	155		0.84	15.9	Normal weight	-0.95
113	474	JPOCZ	2089455	1999-09-19	2009-08-20	119	9	9.91941	Between 5 and 13	M	1		12	1	1	5	2	31.25	31.25	31.25	31.25			132.2	132.2	132.1	132.17	0.07	-0.82	17.9	Normal weight	0.76
114	478	PBR	795483	1996-10-31	2009-08-20	154	12	12.8032	Between 5 and 13	M	1		22	2	1	5	4	35.35	35.4	35.4	35.38			144.4	144.5	144.5	144.47		-1.38	17	Normal weight	-0.58
116	485	CRPS	20187676	1998-10-16	2009-08-20	130	10	10.8443	Between 5 and 13	M	1		33	1	1	5	2	30.7	30.7	30.75	30.72			136.5	136.5	136.4	136.47		-0.87	16.5	Normal weight	-0.2
119	497	ABMC	2075744	2004-06-25	2009-08-23	62	5	5.16119	Between 5 and 13	M	1		40	1	1	9	3	22.85	22.9	22.9	22.88			115.2	115.2	115.3	115.23	1.53	0.97	17.2	Overweight	1.38
120	502	DSO	2013927	2003-12-19	2009-08-24	68	5	5.68037	Between 5 and 13	M	1		12	1	1	5	6	23	23	23.05	23.02			116.5	116.7	116.5	116.57	1.12	0.53	16.9	Overweight	1.15
121	504	DAS	I455256	1996-03-04	2009-08-24	162	13	13.4715	Between 5 and 13	M	1		31	1	1	5	3	51.4	51.4	51.4	51.4			164.8	164.8	164.8	164.8		0.7	18.9	Normal weight	0.14
122	509	HOB	E9005	2000-02-17	2009-08-24	114	9	9.51918	Between 5 and 13	M	1		22	1	1	5	3	27.1	27.1	27.15	27.12			136	136	136	136	-0.58	0.12	14.7	Normal weight	-1.08
123	510	HRP	811262	1998-12-28	2009-08-24	128	10	10.6557	Between 5 and 13	M	1		10	1	1	6	4	66.8	66.8	66.9	66.83			143.5	143.4	143.5	143.47		0.34	32.5	Obesity	3.97
124	516	GAN	27265	1996-08-25	2009-08-25	156	13	13	Between 5 and 13	M	1		22	2	1	5	5	74	74.05	74.05	74.03			172.8	172.8	172.7	172.767			24.8	Obesity	2.01
125	522	RSS	114223	1996-01-12	2009-08-27	164	13	13.6244	Between 5 and 13	M	1		10	2	1	6	3	52.55	52.55	52.5	52.53			166.8	166.9	166.9	166.87		0.83	18.9	Normal weight	0.07
126	524	WHOS	I375714	2002-05-05	2009-08-27	88	7	7.31027	Between 5 and 13	M	1		12	1	1	5	6	24.15	24.15	24.2	24.17			125.5	125.5	125.5	125.5	0.15	0.37	15.3	Normal weight	-0.15
127	531	MWS	786987	1996-06-09	2009-08-27	159	13	13.216	Between 5 and 13	M	1		22	1	1	5	3	42.25	42.3	42.25	42.27			160.5	160.5	160.6	160.53		0.39	16.4	Normal weight	-1.06
128	532	JDS	326665	2002-07-19	2009-08-27	85	7	7.10525	Between 5 and 13	M	1		35	1	1	5	2	23.4	23.45	23.4	23.42			123	123.1	123	123.03	0.08	0.13	15.5	Normal weight	-0.02
129	536	TBMP	B269098	2004-04-27	2009-08-27	64	5	5.33333	Between 5 and 13	M	1		40	1	1	7	6	17.45	17.5	17.5	17.48			109.5	109.6	109.5	109.53	-0.66	-0.5	14.6	Normal weight	-0.56
130	537	FRNM	F457336	1997-07-29	2009-08-27	145	12	12.0779	Between 5 and 13	M	1		22	1	1	5	4	48.85	48.85	48.85	48.85			156.6	156.6	156.7	156.63		0.99	19.9	Normal weight	0.97
131	538	JLCF	903739	1997-09-25	2009-08-27	143	11	11.9221	Between 5 and 13	M	1		32	1	1	5	3	32.25	32.2	32.5	32.32			149.5	149.5	149.6	149.53		0.14	14.5	Normal weight	-1.97
132	539	AJM	812630	1997-05-23	2009-08-28	147	12	12.2637	Between 5 and 13	M	1		32	1	1	5	4	58	58	58	58			155	155	155	155		0.58	24.1	Obesity	2.05
133	542	WOS	2004319	2003-04-30	2009-08-28	76	6	6.32785	Between 5 and 13	M	1		40	1	1	6	3	20.75	20.75	20.8	20.78			114.6	114.7	114.6	114.63	-0.18	-0.65	15.8	Normal weight	0.33
134	544	GPA	2099805	2002-06-25	2009-08-28	86	7	7.17489	Between 5 and 13	M	1		35	1	1	4	6	20.05	20.1	20.1	20.08			115.8	115.8	115.8	115.8	-1.12	-1.29	15	Normal weight	-0.4
135	546	ALSA	838240	2000-02-23	2009-08-30	114	9	9.51918	Between 5 and 13	M	1		35	1	1	4	4	44	43.95	44	43.98			137.8	137.6	137.6	137.67	2.2	0.39	23.2	Obesity	2.6
136	555	ASSO	2026162	2004-08-09	2009-08-30	61	5	5.05753	Between 5 and 13	M	1		22	1	1	5	3	22.15	22.15	22.15	22.15			110.8	110.8	110.8	110.8	1.33	0.1	18	Overweight	1.86
137	557	ALS		2004-06-18	2009-08-30	62	5	5.19954	Between 5 and 13	M	1		38	1	1	9	3	18.1	18.15	18.15	18.13			112	111.6	111.6	111.73	-0.26	0.16	14.5	Normal weight	-0.6
138	558	LEIS	H236473	2004-06-27	2009-08-30	62	5	5.17489	Between 5 and 13	M	1		22	1	1	4	6	22.3	22.35	22.35	22.33			117.5	117.6	117.5	117.53	1.34	1.44	16.2	Normal weight	0.67
139	561	GRS	114170	1997-11-09	2009-08-31	142	11	11.8103	Between 5 and 13	M	1		10	1	1	4	3	65.25	65.25	65.3	65.27			144.5	144.6	144.5	144.53		-0.48	31.2	Obesity	3.26
140	562	MALM	I456237	2002-10-04	2009-08-31	83	6	6.90731	Between 5 and 13	M	1		12	3	1	6	3	22.55	22.6	22.6	22.58			124.5	124.6	124.5	124.53	-0.03	0.63	14.6	Normal weight	-0.69
141	563	IMFB	F72944	1998-01-25	2009-08-31	139	11	11.5998	Between 5 and 13	M	1		26	1	1	5	4	56.95	56.95	56.95	56.95			157.1	157.2	157	157.1		1.52	23.1	Overweight	1.99
142	564	DSS	2010133	2003-09-11	2009-08-31	72	6	5.97146	Between 5 and 13	M	1		22	1	1	4	3	20.05	20.1	20.1	20.08			113.6	113.7	113.7	113.67	-0.14	-0.43	15.5	Normal weight	0.18
143	565	MLS	865209	1999-02-25	2009-08-31	126	10	10.5164	Between 5 and 13	M	1		22	1	1	4	4	51.65	51.7	51.7	51.68			151.5	151.6	151.6	151.57		1.69	22.5	Obesity	2.14
144	569	JCAFF	2020833	2004-06-06	2009-09-01	63	5	5.2363	Between 5 and 13	M	1		22	1	1	9	4	16.9	16.95	16.9	16.92			109.5	109.5	109.6	109.53	-0.83	-0.37	14.1	Normal weight	-0.96
145	574	FRAG	D1707	2002-01-23	2009-09-04	91	7	7.61461	Between 5 and 13	M	1		34	1	1	5	3	32.5	32.5	32.5	32.5			127.8	127.8	127.8	127.8	1.89	0.48	19.9	Obesity	2.2
146	575	PBS	802579	1996-05-23	2009-09-04	160	13	13.2813	Between 5 and 13	M	1		10	2	1	5	3	61.9	61.9	61.9	61.9			164.7	164.7	164.7	164.7		0.87	22.8	Overweight	1.49
147	576	MHVBS	D87452	1999-10-19	2009-09-04	119	9	9.87557	Between 5 and 13	M	1		6	1	1	6	3	33.3	33.3	33.25	33.28			140.3	140.3	140.3	140.3	0.47	0.5	16.9	Normal weight	0.29
148	578	OAAS	2026792	1999-08-30	2009-09-04	120	10	10.0121	Between 5 and 13	M	1		10	1	1	5	2	24.7	24.7	24.7	24.7			133	133.2	133	133.07	-1.54	-0.75	13.9	Normal weight	-1.81
149	579	CCB	29075	2000-01-24	2009-09-04	115	9	9.61187	Between 5 and 13	M	1		12	1	1	5	6	37.2	37.2	37.2	37.2			134.6	134.6	134.6	134.6	1.28	-0.19	20.5	Overweight	1.85
150	581	MCR	2109210	1999-07-07	2009-09-06	122	10	10.1639	Between 5 and 13	M	1		22	2	1	6	4	77.2	77.2	77.25	77.22			155	155.1	155.1	155.07		2.55	32.1	Obesity	4.19
151	582	VTA	21892	1999-09-08	2009-09-21	121	10	10.0356	Between 5 and 13	M	1		32	1	1	5	2	31.75	31.7	31.7	31.72			139.5	139.5	139.6	139.53	0.11	0.24	16.3	Normal weight	-0.1
152	585	AOC	2092930	1998-10-27	2009-09-29	131	10	10.9221	Between 5 and 13	M	1		17	1	1	5	3	35.1	35.1	35.15	35.12			146.5	146.7	146.5	146.57		0.58	16.3	Normal weight	-0.31
153	589	GVPJ	2007096	2003-06-30	2009-09-29	75	6	6.24726	Between 5 and 13	M	1		22	1	1	9	4	26.95	27	27	26.98			124	123.8	123.8	123.87	1.75	1.29	17.6	Overweight	1.45
154	590	VAG	867440	1999-06-20	2009-09-29	123	10	10.2747	Between 5 and 13	M	1		35	1	1	5	2	25.9	25.9	25.85	25.88			131.5	131.6	131.4	131.5		-1.19	15	Normal weight	-1.04
155	591	NCS	2010092	2002-09-18	2009-09-29	84	7	7.03014	Between 5 and 13	M	1		6	2	1	5	3	57.8	57.85	57.85	57.83			135.3	135.4	135.4	135.37	6.97	2.54	31.6	Obesity	6.85
156	594	MAC	29148	2000-01-27	2009-09-29	116	9	9.67215	Between 5 and 13	M	1		13	2	1	9	5	54.45	54.5	54.5	54.48			144.5	145	145	144.83	3.08	1.4	26	Obesity	3.12
157	597	AFC	2104835	1995-10-14	2009-09-29	168	14	13.9578	Between 5 and 13	M	1		22	1	1	6	4	63.65	63.6	63.65	63.63			149.5	149.45	149.5	149.48		-1.75	28.5	Obesity	2.44
158	598	DHS	804667	1997-04-02	2009-09-29	150	12	12.4906	Between 5 and 13	M	1		40	2	1	5	5	64.65	64.6	64.6	64.62			149.5	149.4	149.5	149.47		-0.4	28.9	Obesity	2.78
159	605	JARB	2020788	2004-06-04	2009-10-01	64	5	5.32511	Between 5 and 13	M	1		22	1	1	8	3	23.05	23.05	23.1	23.07			110.5	110.4	110.4	110.43	1.44	-0.3	18.9	Obesity	2.33
160	610	HOS	816806	1997-09-03	2009-10-02	145	12	12.0806	Between 5 and 13	M	1		22	1	1	5	3	30.35	30.35	30.35	30.35			141.8	141.8	141.9	141.83		-1.09	15.1	Normal weight	-1.52
161	611	ERR		1998-08-26	2009-10-02	133	11	11.1009	Between 5 and 13	M	1		40	1	1	5	3	46.7	46.7	46.75	46.72			153	153.1	153.1	153.07		1.39	19.9	Overweight	1.25
162	612	ALS	856937	1998-07-09	2009-10-02	135	11	11.2308	Between 5 and 13	M	1		17	1	1	5	4	40.55	40.5	40.55	40.53			145.4	145.4	145.5	145.43		0.15	19.2	Normal weight	0.93
163	616	PHGB	35030	2000-01-21	2009-10-04	117	9	9.70342	Between 5 and 13	M	1		34	1	1	5	2	27.55	27.55	27.6	27.57			135.4	135.4	135.5	135.43	-0.59	-0.13	15	Normal weight	-0.85
164	617	HRA	31972	2000-04-06	2009-10-04	114	9	9.49452	Between 5 and 13	M	1		27	1	1	3	3	31.7	31.75	31.75	31.73			134.5	134.4	134.5	134.47	0.44	-0.11	17.5	Normal weight	0.71
165	619	HOEA		2003-07-09	2009-10-04	75	6	6.2363	Between 5 and 13	M	1		22	1	1	4	2	17.75	17.75	17.8	17.77			110.3	110.4	110.3	110.33	-1.3	-1.4	14.6	Normal weight	-0.58
166	623	MNF	E97425	2002-10-21	2009-10-13	84	7	6.97808	Between 5 and 13	M	1		40	1	1	4	3	24.35	24.35	24.4	24.37			127	127.1	127	127.03	0.47	1.03	15.1	Normal weight	-0.28
167	628	ES	2092912	2003-02-28	2009-10-04	79	6	6.60091	Between 5 and 13	M	1		22	1	1	4	3	22.6	22.6	22.65	22.62			121.5	121.5	121.6	121.53	0.23	0.41	15.3	Normal weight	-0.06
169	637	EJS	J460551	2003-01-27	2009-10-05	80	6	6.68973	Between 5 and 13	M	1		22	1	1	5	4	31.65	31.7	31.7	31.68			121.1	121.1	121.1	121.1	2.45	0.22	21.6	Obesity	3.14
170	641	LDSL	2020519	2004-05-27	2009-10-05	64	5	5.35639	Between 5 and 13	M	1		22	1	1	5	6	19.25	19.25	19.3	19.27			108.7	108.7	108.6	108.67	0.07	-0.71	16.3	Normal weight	0.77
172	645	JDNB	A350398	2002-10-18	2009-10-05	84	7	6.96438	Between 5 and 13	M	1		22	1	1	5	3	22.85	22.9	22.9	22.88			123.3	123.2	123.3	123.27	0.02	0.33	15.1	Normal weight	-0.31
173	648	CMM	806771	1996-07-26	2009-10-05	158	13	13.1925	Between 5 and 13	M	1		6	1	1	5	3	43.3	43.3	43.3	43.3			158	158.1	158	158.03		0.08	17.3	Normal weight	-0.51
174	654	LCB	828301	2000-08-05	2009-10-06	110	9	9.16941	Between 5 and 13	M	1		1	1	1	4	3	33.9	33.9	33.95	33.92			137.5	137.4	137.4	137.43	1.05	0.65	18	Normal weight	0.98
175	670	KBS	25277	1999-02-10	2009-10-09	128	10	10.6639	Between 5 and 13	M	1		22	1	1	4	1	26.5	26.5	26.55	26.52			134	134.1	134.1	134.07		-1.09	14.8	Normal weight	-1.31
176	678	SOC	1564	2002-04-09	2009-10-11	90	7	7.50548	Between 5 and 13	M	1		4	1	1	5	1	29.45	29.5	29.5	29.48			130.4	130.4	130.3	130.37	1.35	1.06	17.3	Overweight	1.06
177	680	AFB	896472	1999-05-26	2009-10-11	125	10	10.3756	Between 5 and 13	M	1		12	1	1	5	2	30.3	30.3	30.35	30.32			135.6	135.6	135.7	135.63		-0.63	16.5	Normal weight	-0.08
178	682	HMI	2007221	1998-10-18	2009-10-11	132	11	10.9808	Between 5 and 13	M	1		22	1	1	5	3	36.65	36.7	36.7	36.68			149.1	149	149	149.03		0.9	16.5	Normal weight	-0.23
179	694	JNS	880055	2000-03-02	2009-10-12	115	9	9.61073	Between 5 and 13	M	1		40	1	1	4	5	54.4	54.45	54.45	54.43			145.2	145.3	145.2	145.23	3.13	1.52	25.8	Obesity	3.1
180	695	MFS	2063849	2001-11-24	2009-10-12	95	7	7.88379	Between 5 and 13	M	1		40	1	1	4	2	22.55	22.6	22.6	22.58			120.4	120.3	120.3	120.33	-0.77	-1.12	15.6	Normal weight	-0.07
181	697	TMSC	2015978	2002-07-07	2009-10-12	87	7	7.2637	Between 5 and 13	M	1		6	1	1	5	1	26.55	26.5	26.55	26.53			123.2	123.1	123.1	123.13	0.83	-0.02	17.5	Overweight	1.19
182	700	MFBP	B455843	2003-01-18	2009-10-13	81	6	6.7363	Between 5 and 13	M	1		22	1	1	5	3	19.35	19.4	19.4	19.38			112.1	112.1	112.2	112.13	-1.04	-1.56	15.4	Normal weight	-0.01
183	701	DCC	D838636	2004-07-14	2009-10-14	63	5	5.25	Between 5 and 13	M	1		40	1	1	4	2	17.4	17.4	17.45	17.42			106	105.8	105.8	105.87	-0.61	-1.18	15.5	Normal weight	0.21
184	703	RMS	B15897	2000-12-17	2009-10-14	106	8	8.82511	Between 5 and 13	M	1		40	1	1	5	3	30.75	30.75	30.8	30.77			133.8	133.8	133.7	133.77	0.69	0.36	17.2	Normal weight	0.69
185	704	GSS	2007228	2003-07-03	2009-10-14	75	6	6.28014	Between 5 and 13	M	1		35	1	1	4	3	21.3	21.3	21.35	21.32			119.2	119.3	119.3	119.27	0.05	0.33	15	Normal weight	-0.27
186	709	GSM	822769	1997-12-30	2009-10-15	142	11	11.7922	Between 5 and 13	M	1		22	1	1	6	3	46.4	46.35	46.4	46.38			141.5	141.6	141.5	141.53		-0.89	23.2	Overweight	1.96
187	711	PHR	2010487	2003-09-22	2009-10-15	73	6	6.06416	Between 5 and 13	M	1		34	1	1	5	2	21.9	21.85	21.9	21.88			117	117.1	117.1	117.07	0.42	0.15	16	Normal weight	0.47
188	716	FBD	887855	1998-01-02	2009-10-15	142	11	11.7856	Between 5 and 13	M	1		12	1	1	5	1	35.4	35.4	35.45	35.42			141	141.1	141	141.03		-0.95	17.8	Normal weight	0.2
189	717	VCP	C144930	2004-02-07	2009-10-15	68	5	5.68858	Between 5 and 13	M	1		6	1	1	4	5	26.05	26.1	26.1	26.08			116	116.1	116.1	116.07	2	0.42	19.4	Obesity	2.49
190	720	GKA		2004-03-28	2009-10-15	67	5	5.54772	Between 5 and 13	M	1		40	1	1	6	3	26.3	26.3	26.3	26.3			121.5	121.4	121.5	121.47	2.18	1.73	17.8	Overweight	1.7
191	722	NRP	120303	1999-11-15	2009-10-15	119	9	9.91667	Between 5 and 13	M	1		40	1	1	5	3	35.35	35.4	35.4	35.38			141.8	141.8	141.9	141.83	0.8	0.71	17.6	Normal weight	0.62
192	723	WCS	I404105	2002-04-06	2009-10-16	90	7	7.5274	Between 5 and 13	M	1		38	1	1	5	3	26.35	26.3	26.35	26.33			127	127	127.1	127.03	0.59	0.43	16.3	Normal weight	0.46
193	726	RPS	2003797	2003-02-13	2009-10-16	80	6	6.67489	Between 5 and 13	M	1		26	1	1	4	3	34.4	34.45	34.5	34.45			116	116.1	116	116.03	2.99	-0.74	25.6	Obesity	4.79
194	734	LFSC	123760	2001-09-15	2009-10-18	97	8	8.09155	Between 5 and 13	M	1		40	2	1	5	3	26.7	26.75	26.75	26.73			123.5	123.5	123.6	123.53	0.28	-0.74	17.5	Overweight	1.02
195	735	VBGS	I201891	2004-02-02	2009-10-18	69	5	5.7105	Between 5 and 13	M	1		34	1	1	4	3	20.1	20.1	20.15	20.12			113.5	113.6	113	113.37	0.1	-0.17	15.7	Normal weight	0.28
196	737	GCF	775400	1999-02-02	2009-10-18	129	10	10.7105	Between 5 and 13	M	1		35	1	1	5	4	51.85	51.85	51.9	51.87			148.7	148.7	148.5	148.63		1.07	23.5	Obesity	2.31
197	740	ADS	7335	1998-01-07	2009-10-19	141	11	11.7829	Between 5 and 13	M	1		12	1	1	6	3	34.55	34.55	34.6	34.57			138.1	138	138	138.03		-1.38	18.1	Normal weight	0.36
198	741	EFSS	838261	1996-03-20	2009-10-19	163	13	13.5806	Between 5 and 13	M	1		32	1	1	4	4	52.1	52.15	52.15	52.13			166	166.1	166.1	166.07		0.76	18.9	Normal weight	0.1
199	747	PGMS	I411053	2004-08-30	2009-10-20	62	5	5.13927	Between 5 and 13	M	1		40	1	1	5	6	15.95	15.95	15.9	15.93			106	106.1	106.1	106.07	-1.22	-0.99	14.2	Normal weight	-0.92
200	748	KKOS	2013431	2003-10-28	2009-10-20	72	6	5.97808	Between 5 and 13	M	1		12	1	1	6	3	28.2	28.25	28.25	28.23			120	120	120.1	120.03	2.29	0.85	19.6	Obesity	2.53
201	750	C211884	C211884	1996-10-29	2009-10-20	156	13	12.9753	Between 5 and 13	M	1		32	1	1	6	5	59.1	59.1	59.15	59.12			160.5	160.6	160.6	160.57		0.64	22.9	Overweight	1.6
202	754	RMP	C220246	2001-03-18	2009-10-20	103	8	8.58881	Between 5 and 13	M	1		40	1	1	5	3	27.95	27.95	28	27.97			126	126	126	126	0.24	-0.75	17.6	Normal weight	0.96
203	755	LSO	A18225	1999-06-25	2009-10-20	124	10	10.3196	Between 5 and 13	M	1		12	1	1	6	2	27.45	27.5	27.5	27.48			133.5	133.5	133.5	133.5		-0.92	15.4	Normal weight	-0.73
204	756	JVAS	G448947	1999-12-19	2009-10-20	118	9	9.83607	Between 5 and 13	M	1		6	1	1	6	2	28.75	28.8	28.8	28.78			136.7	136.7	136.8	136.73	-0.39	-0.03	15.4	Normal weight	-0.62
205	762	APM	B462599	2000-12-11	2009-10-22	106	8	8.86347	Between 5 and 13	M	1		12	1	1	6	2	22.95	23	23	22.98			129.3	129.3	129.2	129.27	-1.32	-0.43	13.8	Normal weight	-1.72
206	764	VSB	123058	1996-06-09	2009-10-22	161	13	13.3689	Between 5 and 13	M	1		10	1	1	5	2	31	31.05	31.05	31.03			138.5	138.6	138.6	138.57		-2.68	16.2	Normal weight	-1.27
207	765	DCBA	19973	1999-07-08	2009-10-22	124	10	10.2884	Between 5 and 13	M	1		32	1	1	4	3	49.05	49.1	49.1	49.08			157	157.1	157.1	157.07		2.74	19.9	Overweight	1.46
208	767	TTK	F406963	1998-01-05	2009-10-22	142	11	11.7966	Between 5 and 13	M	1		12	1	1	6	4	54.6	54.6	54.65	54.62			155.5	155.6	155.5	155.53		1.1	22.6	Overweight	1.82
209	771	LASM	2028141	2003-01-13	2009-10-26	81	6	6.78562	Between 5 and 13	M	1		40	1	1	6	3	20.4	20.4	20.45	20.42			113.1	113.1	113.2	113.13	-0.68	-1.42	16	Normal weight	0.36
210	772	LMS	124759	2001-09-10	2009-10-26	98	8	8.12717	Between 5 and 13	M	1		40	1	1	5	1	24.45	24.5	24.5	24.48			124.3	124.4	124.4	124.37	-0.35	-0.63	15.8	Normal weight	0.04
211	773	LFMA	2088629	2003-05-29	2009-10-26	77	6	6.40845	Between 5 and 13	M	1		12	1	1	4	4	22.4	22.45	22.4	22.42			121.2	121.2	121.1	121.17	0.32	0.55	15.3	Normal weight	-0.07
212	778	JAGG	H18396	2001-08-10	2009-10-26	99	8	8.2105	Between 5 and 13	M	1		22	1	1	5	3	31.4	31.4	31.45	31.42			126.5	126.4	126.4	126.43	1.25	-0.34	19.7	Overweight	1.93
213	783	AFM	2020077	2004-05-17	2009-10-26	65	5	5.44132	Between 5 and 13	M	1		12	1	1	4	3	20.2	20.25	20.25	20.23			110.5	110.6	110.6	110.57	0.37	-0.42	16.5	Normal weight	0.92
214	785	VASW	2056232	2001-05-31	2009-10-26	101	8	8.40297	Between 5 and 13	M	1		22	2	1	6	3	26.7	26.7	26.7	26.7			126.8	126.8	126.9	126.83	0.06	-0.45	16.6	Normal weight	0.45
215	792	DNS	2076576	2000-07-30	2009-10-28	111	9	9.24452	Between 5 and 13	M	1		34	1	1	6	4	44.85	44.9	44.85	44.87			144.6	144.6	144.5	144.57	2.48	1.76	21.5	Obesity	2.23
216	794	ATS	2028631	1996-10-20	2009-10-28	156	13	13.0219	Between 5 and 13	M	1		12	1	1	5	2	31.2	31.25	31.2	31.22			143.8	143.9	143.9	143.87		-1.66	15.1	Normal weight	-1.89
218	796	GDB	885890	2000-02-15	2009-10-29	117	9	9.70502	Between 5 and 13	M	1		34	1	1	4	4	69.35	69.4	69.4	69.38			152	152.1	152.1	152.07	4.47	2.53	30	Obesity	4.02
219	800	MHSC	J373573	1997-02-05	2009-10-29	153	12	12.7324	Between 5 and 13	M	1		6	1	1	4	3	33.2	33.25	33.25	33.23			149.5	149.5	149.6	149.53		-0.62	14.9	Normal weight	-1.95
220	815	LPS	B169003	2001-12-22	2009-11-06	95	7	7.87283	Between 5 and 13	M	1		40	1	1	6	3	26.35	26.4	26.4	26.38			128	128	128	128	0.35	0.25	16.1	Normal weight	0.26
221	822	NRG	123190	1999-11-15	2009-11-09	120	10	9.98356	Between 5 and 13	M	1		22	1	1	4.5	3	26.2	26.2	26.25	26.22			132.8	132.8	132.7	132.77	-1.11	-0.77	14.9	Normal weight	-1.03
222	828	GRS	2107674	2003-11-28	2009-11-09	71	5	5.94795	Between 5 and 13	M	1		35	1	1	4	6	20.25	20.3	20.3	20.28			110.1	110.2	110.1	110.13	-0.04	-1.12	16.7	Normal weight	0.98
223	829	GLS	23637	1999-03-17	2009-11-09	128	10	10.6447	Between 5 and 13	M	1		40	1	1	5	3	35.95	36	36	35.98			140	140	139.9	139.97		-0.19	18.4	Normal weight	0.78
224	831	DOGF	233228	1999-10-02	2009-11-09	121	10	10.1025	Between 5 and 13	M	1		22	1	1	5	4	53.55	53.5	53.5	53.52			146.2	146.1	146.1	146.13		1.22	25.1	Obesity	2.8
225	839	AVSB	2017088	2001-10-30	2009-11-12	96	8	8.03402	Between 5 and 13	M	1		25	1	1	5	6	21.8	21.8	21.85	21.82			122.6	122.7	122.7	122.67	-1.14	-0.85	14.5	Normal weight	-0.92
226	841	GSO	J61278	2001-04-18	2009-11-12	103	8	8.56689	Between 5 and 13	M	1		22	1	1	4	3	29.25	29.3	29.3	29.28			133.3	133.2	133.2	133.23	0.55	0.5	16.5	Normal weight	0.36
228	843	WFLS	851577	1998-06-09	2009-11-12	137	11	11.4249	Between 5 and 13	M	1		35	1	1	5	4	57.2	57.25	57.25	57.23			155.5	155.5	155.6	155.53		1.45	23.7	Obesity	2.16
229	844	PHSO	2026281	2004-10-21	2009-11-12	61	5	5.05868	Between 5 and 13	M	1		40	1	1	9	6	21.75	21.8	21.8	21.78			110.5	110.6	110.5	110.53	1.21	0.04	17.8	Overweight	1.74
230	846	GSV	2025878	2004-10-12	2009-11-13	61	5	5.08607	Between 5 and 13	M	1		32	1	1	4	6	18.9	18.95	18.95	18.93			113.7	113.8	113.7	113.73	0.17	0.75	14.6	Normal weight	-0.51
231	851	LGM	I465478	2004-01-28	2009-11-14	70	5	5.79498	Between 5 and 13	M	1		12	1	1	6	99	13.9	13.95	13.95	13.93			101.1	101.1	101	101.07	-2.89	-2.81	13.6	Normal weight	-1.4
232	858	LFPM	2109223	1996-06-11	2009-11-16	161	13	13.4304	Between 5 and 13	M	1		22	1	1	6	3	50.15	50.2	50.15	50.17			169.2	169.2	169.3	169.23		1.33	17.5	Normal weight	-0.51
233	860	KCSR	A262998	2004-10-26	2009-11-16	61	5	5.05594	Between 5 and 13	M	1		22	1	1	11	3	19.7	19.75	19.7	19.72			108.1	108	108	108.03	0.49	-0.49	16.9	Overweight	1.18
234	866	VAI	G133476	2003-05-31	2009-11-16	78	6	6.4589	Between 5 and 13	M	1		13	2	1	6	2	21	21.05	21.05	21.03			120	120.1	120.1	120.07	-0.2	0.28	14.6	Normal weight	-0.61
235	870	EAS	J28844	1998-10-01	2009-11-16	134	11	11.1244	Between 5 and 13	M	1		12	1	1	5	3	55.9	55.9	55.95	55.92			149.3	149.3	149.4	149.33		0.81	25.1	Obesity	2.51
236	876	NGS	2100927	2003-04-22	2009-11-18	79	6	6.57237	Between 5 and 13	M	1		25	1	1	4	4	24.1	24.15	24.15	24.13			121.3	121.3	121.3	121.3	0.71	0.39	16.4	Normal weight	0.68
237	877	RVS	I129641	2003-06-16	2009-11-18	77	6	6.42215	Between 5 and 13	M	1		22	1	1	6	3	23	23.05	23.05	23.03			122	122.1	122.1	122.07	0.5	0.71	15.5	Normal weight	0.06
238	878	AACA		2000-07-30	2009-11-21	112	9	9.30868	Between 5 and 13	M	1		32	1	1	5	4	39.3	39.3	39.4	39.33			147.5	147.4	147.5	147.47	1.77	2.17	18.1	Overweight	1
239	884	GWAC	2014423	2004-01-08	2009-11-21	70	5	5.86895	Between 5 and 13	M	1		6	1	1	5	1	14.45	14.5	14.5	14.48			105.2	105.2	105.25	105.22	-2.64	-2.04	13.1	Normal weight	-1.95
240	885	LSS	12539	1998-02-12	2009-11-21	141	11	11.7747	Between 5 and 13	M	1		35	1	1	5	5	56.35	56.4	56.4	56.38			156.4	156.5	156.4	156.43		1.25	23	Overweight	1.94
241	886	CBJ	I466320	1998-06-21	2009-11-21	137	11	11.4167	Between 5 and 13	M	1		34	2	1	5	3	34.9	34.95	34.95	34.93			140.5	140.5	140.6	140.53		-0.72	17.7	Normal weight	0.25
242	894	IYS	H87474	2002-03-08	2009-11-22	93	7	7.70502	Between 5 and 13	M	1		10	3	1	5	2	27.2	27.25	27.25	27.23			120	120	120.1	120.03	0.68	-1.02	18.9	Overweight	1.76
243	895	WVE	G295736	2004-07-14	2009-11-22	64	5	5.35525	Between 5 and 13	M	1		32	1	1	4	3	24.35	24.35	24.4	24.37			119.1	118.9	119	119	1.81	1.49	17.2	Overweight	1.35
244	897	PSPS	E466395	1997-02-16	2009-11-22	153	12	12.7664	Between 5 and 13	M	1		6	1	1	5	3	41.55	41.6	41.6	41.58			156.2	156.2	156.1	156.17		0.25	17	Normal weight	-0.51
245	898	ROA	2003119	2003-04-05	2009-11-22	80	6	6.62991	Between 5 and 13	M	1		22	1	1	4	2	24.55	24.6	24.6	24.58			121	121	121.1	121.03	0.8	0.27	16.8	Normal weight	0.91
246	901	JPBF	856144	1999-04-01	2009-11-23	128	10	10.6436	Between 5 and 13	M	1		22	1	1	5	3	37.3	37.35	37.35	37.33			137.7	137.8	137.7	137.73		-0.52	19.7	Overweight	1.28
247	905	GQS	123781	2000-08-02	2009-11-23	112	9	9.30753	Between 5 and 13	M	1		6	2	1	5	1	24.4	24.45	24.45	24.43			129	129	129.1	129.03	-1.17	-0.84	14.7	Normal weight	-1.03
248	906	PHSS	2012275	2003-11-06	2009-11-23	73	6	6.04658	Between 5 and 13	M	1		32	1	1	4	4	39.25	39.3	39.3	39.28			126.5	126.6	126.5	126.53	4.71	2.08	24.5	Obesity	4.74
249	909	WOS	2004319	2003-04-30	2009-11-23	79	6	6.56416	Between 5 and 13	M	1		11	1	1	5	3	21.15	21.15	21.2	21.17			115.3	115.3	115.4	115.33	-0.23	-0.77	15.9	Normal weight	0.37
250	910	CDC	F190960	2004-11-04	2009-11-23	61	5	5.05205	Between 5 and 13	M	1		22	1	1	6	6	20.65	20.7	20.7	20.68			112.5	112.6	112.6	112.57	0.84	0.49	16.3	Normal weight	0.8
251	913	LSL	M321016	1998-09-27	2009-11-24	134	11	11.1584	Between 5 and 13	M	1		12	1	1	5	2	35.35	35.4	35.4	35.38			153	153.1	153	153.03		1.33	15.1	Normal weight	-1.2
252	914	FLA	G25566	2002-07-02	2009-11-24	89	7	7.39361	Between 5 and 13	M	1		35	1	1	5	3	25.5	25.55	25.55	25.53			125.5	125.5	125.5	125.5	0.47	0.28	16.2	Normal weight	0.42
253	922	MOC	2001273	1996-08-21	2009-11-26	159	13	13.2637	Between 5 and 13	M	1		34	2	1	6	3	74,4,	74.45	74.45	74.45			170.5	170.5	170.5	170.5		1.67	25.6	Obesity	2.1
254	931	KSS	2014888	2004-01-20	2009-11-30	70	5	5.86073	Between 5 and 13	M	1		22	1	1	4	3	23.15	23.15	23.15	23.15			128.5	128.5	128.6	128.53	1	2.75	14	Normal weight	-1.05
255	934	ASS	B168380	1999-10-01	2009-11-30	122	10	10.1628	Between 5 and 13	M	1		22	1	1	5	2	19	19	19.1	19.03			106	106	106	106		-5.07	16.9	Normal weight	0.23
256	935	GVF	F186481	2004-01-12	2009-11-30	71	5	5.88265	Between 5 and 13	M	1		6	1	1	4	2	19.3	19.35	19.35	19.33			113	113.1	113	113.03	-0.35	-0.46	15.1	Normal weight	-0.12
257	937	RLS	880518	2001-02-22	2009-11-30	105	8	8.77192	Between 5 and 13	M	1		22	1	1	4	6	26.2	26.25	26.25	26.23			132.5	132.5	132.6	132.53	-0.31	0.2	14.9	Normal weight	-0.72
258	942	KHFS	322706	1997-09-04	2009-12-03	147	12	12.2473	Between 5 and 13	M	1		34	1	1	6	1	39.25	39.3	39.3	39.28			153.5	153.4	153.5	153.47		0.39	16.7	Normal weight	-0.54
259	951	MVSJ	891204	1996-09-14	2009-12-04	159	13	13.2226	Between 5 and 13	M	1		22	2	1	5	3	39.9	39.95	39.9	39.92			155.6	155.6	155.5	155.57		-0.28	16.5	Normal weight	-1
260	953	WCLP	2013403	1998-03-29	2009-12-04	140	11	11.6815	Between 5 and 13	M	1		22	1	1	6	1	35	34.95	34.95	34.97			149.5	149.6	149.5	149.53		0.35	15.6	Normal weight	-0.99
261	955	KSAN	2008316	2003-07-30	2009-12-04	76	6	6.34543	Between 5 and 13	M	1		40	1	1	6	4	18.7	18.75	18.75	18.73			114	114.1	114.1	114.07	-0.98	-0.78	14.4	Normal weight	-0.76
262	959	JVPS	2099654	2004-04-20	2009-12-05	68	5	5.62557	Between 5 and 13	M	1		22	1	1	6	3	18.3	18.35	18.3	18.32			111.5	111.5	111.4	111.47	-0.54	-0.46	14.7	Normal weight	-0.42
263	962	LHASN	860539	1999-03-29	2009-12-05	128	10	10.6842	Between 5 and 13	M	1		32	1	1	4	2	35.05	35.05	35.05	35.05			147	147	147.1	147.03		0.85	16.2	Normal weight	-0.32
264	967	LCO	905027	2002-12-03	2009-12-05	84	7	7.00548	Between 5 and 13	M	1		34	1	1	5	3	27.8	27.8	27.8	27.8			123.5	123.6	123.5	123.53	1.35	0.33	18.2	Overweight	1.62
265	968	GKP		2000-06-07	2009-12-05	114	9	9.49452	Between 5 and 13	M	1		40	2	1	5	3	28.95	28.95	28.95	28.95			138	138	138	138	-0.13	0.46	15.2	Normal weight	-0.67
266	971	ASL	A177028	1999-06-05	2009-12-05	126	10	10.5	Between 5 and 13	M	1		6	1	1	4	1	27.45	27.5	27.5	27.48			139.5	139.4	139.4	139.43		-0.15	14.1	Normal weight	-1.78
267	973	MFP	110273	1997-03-29	2009-12-10	153	12	12.6979	Between 5 and 13	M	1		32	2	1	6	3	46.85	46.85	46.85	46.85			159.5	159.5	159.5	159.5		0.77	18.4	Normal weight	0.18
268	974	CEBDS	902529	2002-09-12	2009-12-14	87	7	7.25548	Between 5 and 13	M	1		35	1	1	4	2	27,2,5	27.3	27.3	27.3			129.5	129.6	129.5	129.53	1.04	1.18	16.3	Normal weight	0.48
269	979	DOGF	233228	1999-10-02	2009-12-15	123	10	10.2023	Between 5 and 13	M	1		12	1	1	6	4	53.6	53.65	53.65	53.63			147.5	147.5	147.5	147.5		1.34	24.7	Obesity	2.69
270	983	GRS	124439	2001-05-15	2009-05-21	96	8	8.01644	Between 5 and 13	M	1		22	1	1	4	3	35.85	35.8	35.8	35.82			138	138.3	138	138.1	2.17	1.9	18.8	Overweight	1.63
271	999	WFMS	2020792	2001-09-11	2009-12-10	99	8	8.24726	Between 5 and 13	M	1		35	1	1	5	3	27.9	27.95	27.95	27.93			128	128.1	128.1	128.07	0.47	-0.09	17	Normal weight	0.73
272	1000	AHL	2110641	2000-08-15	2009-12-15	112	9	9.33333	Between 5 and 13	M	1		10	1	1	8	5	40.5	40.5	40.5	40.5			129	129	129.1	129.03	1.91	-0.86	24.3	Obesity	2.9
372	433	APS	2023249	2004-08-10	2009-08-16	60	5	5.01644	Between 5 and 13	M	1		40	1	1	6	1	19.2	19.2	19.2	19.2			111.5	111.5	111.5	111.5	0.31	0.33	15.4	Normal weight	0.19
9	61	EAM	725289	1994-11-07	2009-04-27	174	14	14.4715	Greater than 13	M			40	1	0	0	5	75	75.1	75.1	75.07			166	166.1	166.1	166.07		-0.01	27.2	Obesity	2.14
70	341	VATM	93230	1994-10-03	2009-07-02	177	14	14.7473	Greater than 13	M			12	1	1	6	4	77.65	77.65	77.65	77.65			172	171.9	171.9	171.93		0.55	26.3	Overweight	1.91
88	375	YLS	90563	1994-07-17	2009-07-07	180	15	14.9726	Greater than 13	M			22	2	1	6	3	43.3	43.3	43.3	43.3			152.4	152.4	152.4	152.4		-2.11	18.6	Normal weight	-0.49
112	472	HMSS	129743	1995-01-04	2009-08-20	176	14	14.6272	Greater than 13	M			40	2	1	6	4	75.45	75.45	75.5	75.47			168.8	168.8	168.9	168.83		0.23	26.5	Overweight	1.98
115	483	VRB	748515	1994-11-16	2009-08-20	177	14	14.761	Greater than 13	M			6	1	1	5	3	55.8	55.8	55.9	55.83			169.1	169	169	169.03		0.17	19.5	Normal weight	-0.02
117	488	MSS	C78334	1995-01-20	2009-08-21	175	14	14.5861	Greater than 13	M			10	1	1	5	3	51.45	51.45	51.4	51.43			156.8	156.8	156.8	156.8		-1.28	20.9	Normal weight	0.55
118	495	KBS	96014	1995-08-23	2009-08-23	168	14	14	Greater than 13	M			32	1	1	5	2	47.85	47.85	47.85	47.85			162	162.1	162	162.03		-0.15	18.2	Normal weight	-0.36
168	636	LRSS		1995-05-16	2009-10-05	173	14	14.3865	Greater than 13	M			40	1	1	5	3	53.3	53.35	53.4	53.35			173	173.1	173	173.03		0.95	17.8	Normal weight	-0.7
171	643	LIS	G460572	1995-05-15	2009-10-05	173	14	14.3893	Greater than 13	M			1	1	1	5	3	74.8	74.8	74.85	74.82			173.2	173.2	173.1	173.17		0.97	25	Overweight	1.72
217	795	KVS	750190	1995-03-28	2009-10-28	175	14	14.5833	Greater than 13	M			6	1	1	6	3	70.5	70.5	70.55	70.52			177	177.1	177.1	177.07		1.32	22.5	Overweight	1.05
227	842	WMVS	J465192	1995-03-17	2009-11-12	176	14	14.653	Greater than 13	M			10	1	1	6	3	51.5	51.55	51.55	51.53			163.6	163.6	163.5	163.57		-0.47	19.3	Normal weight	-0.11
273	3	WVS	A430937	2005-08-29	2009-04-24	44	3	3.65297	Less than 5	M			10	1	1	8	99	18.1	18.1	18.15	18.12			112	112.2	112.1	112.1	2.77	1.16	14.4	Normal weight	-0.82
274	9	GAMS	2089504	2004-07-08	2009-04-25	58	4	4.79658	Less than 5	M			35	1	0	0	99	18.2	18.25	18.2	18.22			116	116	116.1	116.03	1.63	0.12	13.5	Normal weight	-1.41
275	14	LHSD	2049541	2006-02-28	2009-04-25	38	3	3.15845	Less than 5	M			34	1	1	9	99	16.95	16.95	17	16.97			98.6	98.6	98.5	98.57	0.34	1.2	17.5	Overweight	1.44
276	15	WJR	I438869	2006-03-21	2009-04-25	37	3	3.09429	Less than 5	M			10	3	0	0	99	17	17.05	17	17.02			97.5	97.5	97.6	97.53	0.18	1.29	17.9	Overweight	1.72
277	18	PBSS	1416933	2007-01-14	2009-04-25	27	2	2.28014	Less than 5	M			40	3	0	0	99	14.2	14.25	14.2	14.22			89	89.1	89.1	89.07	-0.25	0.9	17.9	Overweight	1.49
278	19	BMS	D424402	2007-02-02	2009-04-25	27	2	2.22968	Less than 5	M			40	3	1	10	99	13	13.05	13	13.02			85	85.1	85	85.03	-1.35	0.23	18	Overweight	1.53
279	22	WRSO	I412187	2006-07-13	2009-04-25	33	2	2.78288	Less than 5	M			40	3	0	0	99	13.35	13.4	13.4	13.38			95	95.1	95.1	95.07	0.2	-0.32	14.8	Normal weight	-0.74
280	26	KAS	2086455	2007-04-29	2009-04-25	24	2	1.98904	Less than 5	M			40	1	0	0	99	18.7	18.7	18.7	18.7			89.2	89.2	89.2	89.2	0.49	3.87	23.5	Obesity	4.88
281	31	VNB	2066747	2007-03-15	2009-04-25	25	2	2.11073	Less than 5	M			40	1	1	9	99	12.6	12.6	12.6	12.6			87	87	87	87	-0.41	0.12	16.6	Normal weight	0.53
282	32	LENO	2081181A	2007-04-10	2009-04-25	25	2	2.0411	Less than 5	M			40	1	1	12	99	12.58	12.6	12.6	12.59			85	85.2	85	85.07	-0.81	0.24	17.4	Overweight	1.05
283	34	GAL	X	2007-04-03	2009-04-25	25	2	2.06027	Less than 5	M			22	1	1	7	99	12.4	12.4	12.45	12.42			90	90.3	90.2	90.17	0.78	0.09	15.3	Normal weight	-0.59
284	35	CEOS	2047810	2006-01-20	2009-04-26	39	3	3.26644	Less than 5	M			34	1	0	0	99	13.9	13.95	13.95	13.93			100	100	100	100	0.49	-0.54	13.9	Normal weight	-1.36
285	36	MRS	2060655	2005-09-17	2009-04-26	43	3	3.60799	Less than 5	M			40	1	1	10	99	17.6	17.6	17.65	17.62			104	104	104.1	104.03	0.85	0.99	16.3	Normal weight	0.67
286	39	RCJ	2070194	2005-05-25	2009-04-26	47	3	3.91941	Less than 5	M			35	1	1	9	99	15.8	15.8	15.8	15.8			92	92	92	92	-2.59	-0.19	18.7	Obesity	2.31
287	42	VES	G423292	2005-10-27	2009-04-26	42	3	3.49726	Less than 5	M			40	1	0	0	99	14.55	14.5	14.5	14.52			98	98.1	98.1	98.07	-0.44	-0.44	15.1	Normal weight	-0.28
288	47	MHSB	2049075	2006-02-17	2009-04-27	38	3	3.19406	Less than 5	M			35	3	1	9	99	16.1	16.1	16.15	16.12			100	100.1	100.1	100.07	0.66	0.74	16.1	Normal weight	0.44
289	52	ALR	2041631	2005-09-06	2009-04-27	44	3	3.64087	Less than 5	M			40	3	1	9	99	13.7	13.7	13.75	13.72			94	94.1	94.1	94.07	-1.68	-1.05	15.5	Normal weight	0.08
290	55	LHMZ	H364544	2006-10-02	2009-04-27	31	2	2.56849	Less than 5	M			40	1	0	0	99	13.05	13.05	13.05	13.05			90	90	90	90	-0.73	-0.25	16.1	Normal weight	0.27
291	60	GMF	2102625	2007-04-13	2009-04-27	24	2	2.03836	Less than 5	M			35	1	0	0	99	13.5	13.4	13.4	13.43			83	83	83	83	-1.47	0.8	19.5	Obesity	2.39
292	62	ISN	K421743	2007-04-02	2009-04-27	25	2	2.06849	Less than 5	M			40	1	1	10	99	13.7	13.7	13.75	13.72			91.5	91.6	91.6	91.57	1.2	0.94	16.4	Normal weight	0.3
293	63	DAS	2099800	2005-07-10	2009-04-28	46	3	3.79932	Less than 5	M			40	1	1	9	99	12.2	12.2	12.25	12.22			96.5	96.6	96.6	96.57	-1.31	-2.14	13.1	Thinness	-2.01
294	68	JPASS	G286185	2006-05-27	2009-04-28	35	2	2.91941	Less than 5	M			40	1	1	10	99	14.6	14.65	14.6	14.62			97	97.2	97.1	97.1	0.45	0.25	15.5	Normal weight	-0.1
295	70	LFAO	I360865	2006-09-23	2009-04-28	31	2	2.59703	Less than 5	M			40	1	0	0	99	14.6	14.65	14.6	14.62			94	94.1	94.1	94.07	0.38	0.67	16.5	Normal weight	0.6
296	74	ARC	2096919	2005-01-01	2009-04-28	52	4	4.32397	Less than 5	M			22	1	0	0	5	18.5	18.55	18.5	18.52			111.2	111.2	111.1	111.17	1.31	0.66	15	Normal weight	-0.23
297	75	LHLS	2056730	2006-07-25	2009-04-28	33	2	2.75822	Less than 5	M			32	1	0	0	99	12.35	12.35	12.3	12.33			93.5	93.5	93.6	93.53	-0.17	-0.98	14.1	Normal weight	-1.39
298	76	VGSS	2069031	2007-04-01	2009-04-28	25	2	2.07397	Less than 5	M			40	1	0	0	99	10.82	10.85	10.85	10.84			84	84.2	84.1	84.1	-1.22	-1.12	15.3	Normal weight	-0.55
299	81	ELJ	E432813	2006-08-30	2009-04-28	32	2	2.66119	Less than 5	M			10	1	1	9	99	13.25	13.2	13.2	13.22			90	90.1	90.1	90.07	-0.93	-0.27	16.3	Normal weight	0.45
300	83	GOS	B413367	2006-07-02	2009-04-28	34	2	2.82123	Less than 5	M			12	1	0	0	99	14.35	14.35	14.3	14.33			95	95	95.1	95.03	0.1	0.21	15.9	Normal weight	0.16
301	85	LMV	?	2006-06-01	2009-04-28	35	2	2.90731	Less than 5	M			40	1	1	5	99	14.05	14.05	14.1	14.07			95	95.1	95.1	95.07	-0.08	-0.05	15.6	Normal weight	-0.05
302	101	IAS	2042566	2005-09-22	2009-05-19	44	3	3.65845	Less than 5	M			22	1	1	9	99	15.95	16	16	15.98			102	101.5	101.5	101.67	0.18	0.16	15.5	Normal weight	0.04
303	102	DRA	2075938	2005-01-10	2009-05-19	52	4	4.35799	Less than 5	M			34	1	1	5	99	19.45	19.4	19.4	19.42			114.5	114	114	114.17	1.95	0.99	14.9	Normal weight	-0.3
304	105	EBM	2087570	2005-05-27	2009-05-19	48	4	3.97808	Less than 5	M			34	1	1	10	99	16.9	16.85	16.9	16.88			98.4	98.5	98.5	98.47	-1.13	0.27	17.4	Overweight	1.51
305	109	SSGF	2064911	2007-02-07	2009-05-21	27	2	2.28836	Less than 5	M			12	1	1	8	99	11.75	11.75	11.75	11.75			89.5	89.5	89.5	89.5	-0.13	-0.75	14.7	Normal weight	-1.04
306	119	GIV	H441332	2004-05-28	2009-05-22	60	5	4.98356	Less than 5	M			40	1	0	0	6	19.9	19.95	19.95	19.93			113	113.1	133.1	119.73	2.13	0.63	13.9	Normal weight	-1.05
307	121	DSF	2035942	2005-05-14	2009-05-22	48	4	4.02192	Less than 5	M			40	1	1	8	99	17.7	17.75	17.7	17.72			105	105.1	105	105.03	0.37	0.61	16.1	Normal weight	0.56
308	124	KKMS	2058373	2006-08-31	2009-05-22	33	2	2.72534	Less than 5	M			11	1	1	8	99	13.45	13.45	13.45	13.45			90	90	89.8	89.93	-1.11	-0.2	16.6	Normal weight	0.72
309	128	GPSM	F331539	2007-01-17	2009-05-22	28	2	2.34703	Less than 5	M			22	1	1	10	99	14.55	14.55	14.55	14.55			92.5	92.5	93	92.67	0.66	0.99	16.9	Normal weight	0.83
310	130	YPS	2051523	2006-04-09	2009-05-24	38	3	3.12443	Less than 5	M			22	1	1	9	99	15.85	15.85	15.85	15.85			99.3	99.3	99.5	99.37	0.62	0.68	16.1	Normal weight	0.39
311	134	GOS	2092371	2006-09-09	2009-05-23	32	2	2.70502	Less than 5	M			40	1	0	0	99	14.95	15	15	14.98			89.7	89.8	89.8	89.75	-1.11	0.73	18.6	Obesity	2.08
312	135	LRO	D328858	2007-01-09	2009-05-23	28	2	2.37169	Less than 5	M			22	1	1	11	99	13.2	13.15	13.2	13.18			95.2	95	95	95.07	1.31	0.11	14.6	Normal weight	-1.09
313	139	PAB	2083166	2006-10-31	2009-05-23	31	2	2.56142	Less than 5	M			22	1	0	0	99	13.85	13.85	13.8	13.83			96.8	96.7	96.5	96.67	1.22	0.25	14.8	Normal weight	-0.82
314	141	JHJR	2103383	2007-04-20	2009-05-23	25	2	2.09155	Less than 5	M			8	1	0	0	99	14.5	14.45	14.45	14.47			83	83.2	83.2	83.13	-1.58	1.36	20.9	Obesity	3.23
315	142	GCC	2055144	2004-06-05	2009-05-23	60	5	4.96598	Less than 5	M			22	1	1	8	99	17.7	17.75	17.75	17.73			108	107.9	108	107.97	-0.38	-0.22	15.2	Normal weight	0.01
316	144	NAC	D440953	2005-09-24	2009-05-24	44	3	3.66667	Less than 5	M			22	1	1	6	99	17.35	17.3	17.35	17.33			100.5	100.5	100.4	100.47	-0.13	0.8	17.2	Overweight	1.32
317	157	ELO	2071723	2007-04-30	2009-05-25	25	2	2.06963	Less than 5	M			22	1	0	0	99	11.55	11.55	11.55	11.55			89.7	89.8	89.8	89.77	0.62	-0.56	14.3	Normal weight	-1.45
318	160	KSMF	2038766	2005-07-09	2009-05-26	47	3	3.87991	Less than 5	M			40	1	1	8	99	16.7	16.75	16.75	16.73			102.5	102.5	102.6	102.53	0	0.3	15.9	Normal weight	0.43
319	169	LHO	2045489	2005-11-25	2009-05-28	42	3	3.50822	Less than 5	M			34	1	1	6	99	14.35	14.35	14.35	14.35			94.5	94.5	94.4	94.47	-1.36	-0.55	16.1	Normal weight	0.5
320	175	JVSO	2036561	2005-05-26	2009-05-28	48	4	4.00548	Less than 5	M			40	2	1	6	99	19	18.95	18.95	18.97			106	106.1	106	106.03	0.64	1.15	16.9	Overweight	1.14
321	178	ASM	2096963	2007-01-03	2009-05-28	29	2	2.40183	Less than 5	M			40	1	0	0	99	13.65	13.65	13.6	13.63			85	85.2	85.1	85.1	-1.77	0.35	18.8	Obesity	2.12
322	182	LFAS	J414739	2006-09-26	2009-05-29	32	2	2.67489	Less than 5	M			29	1	1	9	99	14.1	13.95	14	14.02			84.1	84.1	84.2	84.13	-2.64	0.21	19.8	Obesity	2.81
323	183	ASS	2052714	2006-05-03	2009-05-29	37	3	3.07123	Less than 5	M			40	1	1	10	99	17	17	17	17			97	96.9	97	96.97	0.09	1.31	18.1	Overweight	1.84
324	185	GCNS	2064965	2007-02-08	2009-05-29	28	2	2.30753	Less than 5	M			22	1	1	9	99	14.05	14.05	14.05	14.05			87	87.1	87.1	87.07	-0.93	0.76	18.5	Overweight	1.9
325	187	EPF	2072457	2007-06-01	2009-06-01	24	2	2	Less than 5	M			11	1	1	9	99	12.1	12.1	12.1	12.1			88.5	88.3	88.5	88.43	0.43	-0.04	15.5	Normal weight	-0.45
326	191	KASG	?	2004-08-14	2009-06-01	58	4	4.79772	Less than 5	M			22	1	1	10	99	16.2	16.2	16.1	16.17			104.3	104.2	104.1	104.2	-0.97	-0.78	14.9	Normal weight	-0.25
327	193	KEPG	2023186	2004-08-08	2009-06-02	58	4	4.81689	Less than 5	M			10	2	1	4	99	14.85	14.8	14.8	14.82			104.3	104.3	104.5	104.37	-0.96	-1.46	13.6	Normal weight	-1.34
328	194	DSF	2085759	2006-04-16	2009-06-02	38	3	3.12831	Less than 5	M			22	1	0	0	99	11.45	11.5	11.5	11.48			80.9	80.9	81	80.93	-4.28	-1.99	17.5	Overweight	1.47
329	199	FSF	B373595	2006-11-23	2009-06-02	30	2	2.5258	Less than 5	M			22	1	1	8	99	14.05	14.05	14.05	14.05			92.5	92.4	92.5	92.47	0.09	0.43	16.4	Normal weight	0.51
330	200	VNO	I238893	2004-11-17	2009-06-02	55	4	4.54224	Less than 5	M			6	1	0	0	99	16.35	16.35	16.35	16.35			103	103	103	103	-0.89	-0.49	15.4	Normal weight	0.13
331	204	RAS	2061111	2006-11-01	2009-05-04	30	2	2.50822	Less than 5	M			12	1	1	9	99	10.85	10.9	10.95	10.9			88.1	88.1	88	88.07	-1.15	-1.7	14.1	Normal weight	-1.53
332	205	RSS	I398976	2006-08-23	2009-04-04	31	2	2.61461	Less than 5	M			22	1	0	0	99	18.45	18.45	18.45	18.45			95	95.1	95	95.03	0.6	2.59	20.4	Obesity	3.16
333	206	FBRP	D266837	2005-04-15	2009-06-04	50	4	4.13653	Less than 5	M			40	1	1	4	99	17.9	17.9	17.9	17.9			104.1	104	104	104.03	-0.05	0.57	16.5	Normal weight	0.92
334	211	CCSM	K380474	2006-05-10	2009-06-05	37	3	3.06963	Less than 5	M			22	1	1	9	99	17.4	17.4	17.4	17.4			93.5	93.5	93.4	93.47	-0.85	1.5	19.9	Obesity	2.98
335	214	GS	2066313	2004-07-30	2009-06-05	58	4	4.84817	Less than 5	M			22	1	1	4	99	18.15	18.1	18.15	18.13			111.5	111.6	111.6	111.57	0.57	0.04	14.6	Normal weight	-0.51
336	222	LLB	2083186	2007-06-06	2009-06-06	24	2	2	Less than 5	M			22	1	1	9	99	11	11.425	11.425	11.42			86.5	86.3	86.5	86.43	-0.23	-0.55	15.3	Normal weight	-0.61
337	226	JLAS	2057295	2006-08-07	2009-06-06	34	2	2.83059	Less than 5	M			22	1	1	9	99	14.3	14.3	14.3	14.3			94.5	94.5	94.4	94.47	-0.07	0.18	16	Normal weight	0.29
338	227	PSA	G435800	2006-03-07	2009-06-06	39	3	3.24726	Less than 5	M			8	1	1	6	99	15.35	15.35	15.35	15.35			95.6	95.7	95.7	95.67	-0.61	0.27	16.8	Normal weight	0.96
339	230	MG	F225831	2004-07-10	2009-06-06	59	4	4.90571	Less than 5	M			6	1	1	5	99	18.5	18.5	18.5	18.5			110.5	110.4	110.4	110.43	0.24	0.14	15.2	Normal weight	-0.02
340	231	HRC	F441836	2006-11-10	2009-06-06	31	2	2.57237	Less than 5	M			40	1	1	4	99	12.45	12.45	12.45	12.45			92.5	92.4	92.5	92.47	-0.02	-0.66	14.6	Normal weight	-1.03
341	233	GVB	H383808	2007-03-07	2009-06-06	27	2	2.24726	Less than 5	M			22	1	1	9	99	9.75	9.755	9.75	9.75			83	83.1	83	83.03	-2.04	-2.31	14.1	Normal weight	-1.55
342	239	EAF	C411212	2007-01-18	2009-06-06	29	2	2.38379	Less than 5	M			35	1	1	9	99	16.7	16.75	16.7	16.72			92	92.1	92.1	92.07	0.36	2.12	19.7	Obesity	2.66
343	241	GAF	2048116	2006-01-29	2009-06-07	40	3	3.35639	Less than 5	M			22	1	1	12	99	21.6	21.6	21.6	21.6			99.8	100	100	99.93	0.29	2.88	21.6	Obesity	4.09
344	242	VPSF	B295844	2006-08-03	2009-06-07	34	2	2.84429	Less than 5	M			12	1	0	0	99	13.5	13.5	13.5	13.5			94.5	94.6	94.5	94.53	-0.09	-0.32	15.1	Normal weight	-0.45
345	247	GROA	I314191	2006-10-23	2009-06-09	32	2	2.62831	Less than 5	M			22	1	1	9	99	13.95	13.95	13.95	13.95			90.2	90.1	90	90.1	-0.85	0.23	17.2	Overweight	1.1
346	248	AFCS	A295083	2005-10-11	2009-06-09	44	3	3.66119	Less than 5	M			40	1	1	10	99	15.15	15.15	15.15	15.15			98.5	98.5	98.4	98.47	-0.62	-0.27	15.6	Normal weight	0.18
347	251	LHFS	H444969	2006-01-27	2009-06-09	40	3	3.36735	Less than 5	M			32	1	1	9	99	15.6	15.65	15.65	15.63			102.1	102	102	102.03	0.81	0.29	15	Normal weight	-0.38
348	262	LHPCM	J445026	2006-11-28	2009-06-12	30	2	2.5395	Less than 5	M			35	1	1	8	99	14.5	14.5	14.5	14.5			92.3	92.2	92.2	92.23	-0.01	0.68	17	Normal weight	0.97
349	263	TSO	2082385	2006-02-03	2009-06-12	40	3	3.35799	Less than 5	M			22	1	0	0	99	15.45	15.5	15.5	15.48			93	93.1	93.1	93.07	-1.47	0.23	17.9	Overweight	1.75
350	264	LZ	2068572	2007-04-21	2009-06-12	26	2	2.14201	Less than 5	M			22	1	0	0	99	14.75	14.75	14.75	14.75			91	91	91	91	0.77	1.44	17.8	Overweight	1.37
351	269	LSE	2038320	2005-06-30	2009-06-12	47	3	3.95068	Less than 5	M			11	1	1	4	99	17	17	17	17			102	102.1	102.1	102.07	-0.22	0.35	16.3	Normal weight	0.74
352	275	RGN	?	2004-11-15	2009-06-13	55	4	4.57785	Less than 5	M			7	1	1	6	99	16.15	16.15	16.15	16.15			105	104.9	104.9	104.93	-0.5	-0.61	14.7	Normal weight	-0.46
353	278	NCAG	2086832	2007-05-11	2009-06-13	25	2	2.08881	Less than 5	M			22	1	0	0	99	11.15	11.15	11.2	11.17			84	84.1	84	84.03	-1.29	-0.89	15.8	Normal weight	-0.13
354	286	AGDM	C445588	2005-05-21	2009-06-16	49	4	4.06963	Less than 5	M			40	1	1	5	99	17.6	17.6	17.65	17.62			102	102	102.1	102.03	-0.42	0.52	16.9	Overweight	1.18
355	326	JCFO	2031981	2005-03-02	2009-06-26	52	4	4.31575	Less than 5	M			40	1	1	6	99	19.65	19.7	19.65	19.67			108	108.1	108	108.03	0.59	1.12	16.9	Overweight	1.15
356	327	LPD	2053851	2006-05-24	2009-06-26	37	3	3.08881	Less than 5	M			32	1	1	8	99	14.95	14.9	14.95	14.93			94	94	94	94	-0.74	0.22	16.9	Overweight	1.02
357	339	KJM	D181130	2004-08-18	2009-06-30	58	4	4.86621	Less than 5	M			40	1	1	6	99	24.35	24.35	24.35	24.35			116	116.1	116.1	116.07	1.53	2.18	18.1	Overweight	1.9
358	342	GGB	H242063	2005-10-04	2009-07-02	45	3	3.74452	Less than 5	M			34	1	1	9	99	19.1	19.15	19.1	19.12			104.4	104.5	104.5	104.47	0.71	1.48	17.5	Overweight	1.56
359	345	MGCJ	J254455	2005-12-18	2009-07-02	42	3	3.5395	Less than 5	M			22	1	1	4	99	14.35	14.35	14.35	14.35			96	96.1	96	96.03	-1.03	-0.58	15.6	Normal weight	0.1
360	350	MSC	2053933	2004-10-19	2009-07-02	56	4	4.70342	Less than 5	M			22	1	1	8	99	18	18	18	18			106	106.1	106.1	106.07	-0.43	0.11	16	Normal weight	0.57
361	354	GMFC	2057305	2005-10-08	2009-07-10	45	3	3.75548	Less than 5	M			22	1	1	8	99	16.6	16.65	16.6	16.62			101.1	101.2	101.2	101.17	-0.12	0.37	16.2	Normal weight	0.66
362	377	MÊS	2058644	2006-09-08	2009-07-07	34	2	2.83059	Less than 5	M			35	1	0	0	99	20.65	20.65	20.6	20.63			98	98	98.1	98.03	0.92	3.21	21.5	Obesity	3.87
363	385	KPS	E450868	2005-06-29	2009-07-23	49	4	4.06689	Less than 5	M			10	3	1	5	99	17.5	17.5	17.5	17.5			107	107	107	107	0.76	0.47	15.3	Normal weight	-0.03
364	386	EOS	F329837	2005-12-26	2009-07-23	43	3	3.57511	Less than 5	M			40	1	1	13	99	17.1	17.1	17.1	17.1			101.5	101.4	101.5	101.47	0.27	0.79	16.6	Normal weight	0.91
365	392	DFS	2107142	2007-03-20	2009-08-04	29	2	2.37283	Less than 5	M			1	1	1	10	99	14.5	14.5	14.45	14.48			90	90	90	90	-0.24	0.9	17.9	Overweight	1.5
366	399	GOR	I210876	2004-11-07	2009-08-07	57	4	4.75	Less than 5	M			11	1	1	4	99	18.15	18.15	18.2	18.17			109	109.1	109	109.03	0.16	0.14	15.3	Normal weight	0.05
367	401	VBR	2029383	2005-01-08	2009-08-10	55	4	4.58881	Less than 5	M			32	1	1	5	99	16.05	16.05	16.05	16.05			105.5	105.4	105.5	105.47	-0.4	-0.67	14.4	Normal weight	-0.65
368	407	LVSN	2063122	2006-12-21	2009-08-10	32	2	2.63653	Less than 5	M			22	1	1	8	99	11.35	11.35	11.35	11.35			91.8	91.8	91.8	91.8	-0.38	-1.53	13.5	Thinness	-2.04
369	414	GVRCS	F393170	2006-05-14	2009-08-11	39	3	3.24178	Less than 5	M			40	1	1	9	99	17.35	17.3	17.35	17.33			102.1	102	101.9	102	1.05	1.26	16.7	Normal weight	0.88
370	423	JPSB	2056066	2006-07-10	2009-08-11	37	3	3.08607	Less than 5	M			25	1	0	0	99	14.45	14.45	14.45	14.45			95.5	95.5	95.5	95.5	-0.34	-0.04	15.8	Normal weight	0.22
371	426	PHOS	C323538	2006-05-11	2009-08-13	39	3	3.25548	Less than 5	M			40	1	1	10	99	16.7	16.7	16.75	16.72			99.8	100	100	99.93	0.48	0.95	16.7	Normal weight	0.95
373	440	RLS	1222394	2004-09-20	2009-08-16	59	4	4.90571	Less than 5	M			10	1	1	12	99	17.45	17.45	17.45	17.45			105.6	105.6	105.7	105.63	-0.81	-0.29	15.6	Normal weight	0.33
374	447	KSM	2056022	2006-07-09	2009-08-17	37	3	3.10525	Less than 5	M			22	1	1	4	99	13.8	13.8	13.8	13.8			94.5	94.5	94.5	94.5	-0.64	-0.44	15.5	Normal weight	-0.09
375	454	FGTS	2050100	2005-12-10	2009-08-17	44	3	3.68584	Less than 5	M			22	1	1	6	99	13.85	13.85	13.9	13.87			98.8	98.9	98.8	98.83	-0.58	-1	14.2	Normal weight	-1.01
376	459	GPS	2042064	2005-09-15	2009-08-17	47	3	3.92215	Less than 5	M			32	1	1	5	99	19.75	19.75	19.75	19.75			103	102.8	102.8	102.87	0.02	1.55	18.7	Obesity	2.3
377	486	BRXS	2062222	2006-09-02	2009-08-20	36	3	2.96598	Less than 5	M			1	2	1	8	99	13.35	13.4	13.35	13.37			94.1	94.2	94.1	94.13	-0.46	-0.54	15.1	Normal weight	-0.43
378	489	PHS	2064599	2006-06-05	2009-08-21	39	3	3.2105	Less than 5	M			22	1	1	9	99	15.7	15.7	15.7	15.7			99.3	99.3	99.3	99.3	0.41	0.5	15.9	Normal weight	0.31
379	493	RNO	B453956	2006-05-13	2009-08-23	39	3	3.2774	Less than 5	M			22	1	1	8	99	15.15	15.15	15.15	15.15			94.2	94.2	94.2	94.2	-1.05	0.13	17.1	Overweight	1.19
380	494	MM		2005-04-20	2009-08-23	52	4	4.34155	Less than 5	M			40	1	1	4	99	19.45	19.45	19.45	19.45			105.5	105.5	105.6	105.53	-0.02	1.01	17.5	Overweight	1.55
381	499	GRS	A402927	2006-07-22	2009-08-23	37	3	3.08607	Less than 5	M			22	1	0	0	99	15.6	15.6	15.6	15.6			94	94	94.1	94.03	-0.73	0.59	17.6	Overweight	1.55
382	501	ACSB	2043395	2005-10-09	2009-08-24	47	3	3.87443	Less than 5	M			22	1	1	4	99	16	16.05	16	16.02			97	97	96.8	96.93	-1.34	-0.04	17.1	Overweight	1.26
383	505	DGS		2006-09-04	2009-08-24	36	3	2.97146	Less than 5	M			22	1	1	9	99	13.85	13.85	13.9	13.87			92	92	92	92	-1.04	-0.24	16.4	Normal weight	0.61
384	512	TAS	2069459	2007-05-10	2009-08-24	28	2	2.28836	Less than 5	M			22	1	0	0	99	12.05	12.05	12.05	12.05			89.5	89.5	89.5	89.5	-0.16	-0.54	15	Normal weight	-0.71
385	521	RSAS	2061285	2006-06-21	2009-08-27	38	3	3.18311	Less than 5	M			22	1	1	9	99	13.65	13.65	13.7	13.67			92	92	92.1	92.03	-1.44	-0.6	16.1	Normal weight	0.48
386	525	LRM	2037020	2004-09-07	2009-08-27	60	5	4.97146	Less than 5	M			40	1	1	4	99	18	18	18	18			108	107.9	107.9	107.93	-0.4	-0.11	15.5	Normal weight	0.19
387	535	RBMP	C447863	2005-03-10	2009-08-27	54	4	4.46324	Less than 5	M			40	1	0	0	99	16.35	16.3	16.3	16.32			100.5	100.5	100.5	100.5	-1.35	-0.44	16.2	Normal weight	0.67
388	548	GSD	2026659	2004-10-31	2009-08-30	58	4	4.83059	Less than 5	M			34	1	1	5	99	26.3	26.35	26.4	26.35			115	114.9	114.9	114.93	1.33	2.77	19.9	Obesity	2.9
389	551	GVTS	2039383	2005-07-22	2009-08-30	49	4	4.10525	Less than 5	M			40	1	0	0	99	14.35	14.4	14.35	14.37			99	99	99	99	-1.19	-1.12	14.7	Normal weight	-0.53
390	553	GJAL	2053442	2006-05-17	2009-08-30	39	3	3.28562	Less than 5	M			26	1	1	5	99	16.95	17	17	16.98			101.2	101.2	101.1	101.17	0.75	1.04	16.6	Normal weight	0.84
391	559	MVCS	2082393	2006-10-01	2009-08-30	35	2	2.91279	Less than 5	M			22	3	1	8	99	14.85	14.9	14.9	14.88			96.6	96.8	96.8	96.73	0.36	0.41	15.9	Normal weight	0.22
392	560	IAGR	2063823	2007-01-10	2009-08-18	31	2	2.60525	Less than 5	M			20	1	1	10	99	13.3	13.3	13.3	13.3			91.3	91.2	91.3	91.27	-0.45	-0.14	16	Normal weight	0.17
393	567	EDAA	2054273	2006-04-24	2009-09-01	40	3	3.35365	Less than 5	M			22	1	1	8	99	14.65	14.7	14.65	14.67			97.5	97.6	97.5	97.53	-0.33	-0.21	15.4	Normal weight	-0.05
394	577	MTA	2054184	2006-05-31	2009-09-04	39	3	3.25936	Less than 5	M			22	1	1	8	99	15.9	15.9	15.9	15.9			96.5	96.5	96.5	96.5	-0.42	0.54	17.1	Overweight	1.19
395	601	YKNM	B459578	2007-05-08	2009-10-01	29	2	2.39749	Less than 5	M			22	1	0	0	99	12.85	12.9	12.9	12.88			91	91.1	91.1	91.07	0.01	-0.13	15.5	Normal weight	-0.25
396	609	LJB	2068197	2007-04-14	2009-10-02	30	2	2.46712	Less than 5	M			40	1	1	9	99	13.2	13.25	13.25	13.23			96	96.2	96.2	96.13	1.32	0	14.3	Normal weight	-1.29
397	620	HDS	2063414	2006-12-28	2009-10-04	33	2	2.76758	Less than 5	M			35	1	1	6	99	14.05	14.05	14.05	14.05			95.4	95.5	95.5	95.47	0.35	0.11	15.4	Normal weight	-0.22
398	626	COSB	2053282	2006-05-15	2009-10-04	41	3	3.38653	Less than 5	M			34	1	1	9	99	22.3	22.3	22.3	22.3			103.5	103.6	103.6	103.57	1.16	3.1	20.8	Obesity	3.57
399	627	EGO	9416621	2006-02-22	2009-10-04	43	3	3.61735	Less than 5	M			34	1	1	5	99	18.8	18.8	18.85	18.82			108.5	108.5	108.6	108.53	1.96	1.5	16	Normal weight	0.44
400	629	HAA	J460423	2005-06-06	2009-10-04	52	4	4.32785	Less than 5	M			38	1	0	0	99	18.2	18.2	18.25	18.22			105	105.1	105.1	105.07	-0.11	0.53	16.5	Normal weight	0.91
401	631	HMGA	I344430	2006-03-29	2009-10-04	42	3	3.51484	Less than 5	M			1	1	1	8	99	16.55	16.55	16.6	16.57			102.1	102.2	102.2	102.17	0.55	0.59	15.9	Normal weight	0.34
402	634	HSF	D286633	2006-05-13	2009-10-05	41	3	3.39475	Less than 5	M			40	1	1	8	99	15.85	15.9	15.9	15.88			97	97.1	97	97.03	-0.53	0.38	16.9	Overweight	1.06
403	635	JFS	2060635	2006-08-11	2009-10-05	38	3	3.15023	Less than 5	M			22	1	1	10	99	15.55	15.55	15.6	15.57			97	97	97.1	97.03	-0.06	0.5	16.5	Normal weight	0.77
404	638	VBS	2056912	2006-07-30	2009-10-05	38	3	3.18151	Less than 5	M			21	1	1	5	99	14.05	14.1	14.1	14.08			98.2	98.2	98.1	98.17	0.17	-0.36	14.6	Normal weight	-0.78
405	649	MMZ	B438712	2007-04-10	2009-10-05	30	2	2.4863	Less than 5	M			6	1	1	5	2	39.9	39.9	39.95	39.92			151	151	151	151		12.85		N/A
406	650	NAV	2074914	2006-11-18	2009-10-06	35	2	2.88379	Less than 5	M			40	1	1	10	99	12.85	12.85	12.9	12.87			96.1	96.1	96	96.07	0.25	-0.76	13.9	Normal weight	-1.48
407	651	CSF	I117596	2006-03-30	2009-10-06	42	3	3.51758	Less than 5	M			40	1	1	5	2	22.2	22.25	22.3	22.25			119.5	119.5	119.5	119.5	4.91	2.91	15.6	Normal weight	0.12
408	656	KOF	2033242	2005-03-23	2009-10-08	55	4	4.54224	Less than 5	M			38	1	1	4	99	18.6	18.6	18.6	18.6			109.9	109.8	109.8	109.83	0.65	0.49	15.4	Normal weight	0.13
409	672	RMS	2061979	2006-11-25	2009-10-09	34	2	2.87283	Less than 5	M			9	1	1	9	99	12.3	12.3	12.35	12.32			90	90.1	90.1	90.07	-1.37	-1.12	15.2	Normal weight	-0.38
410	677	CEAV	J319369	2006-04-14	2009-08-23	40	3	3.35799	Less than 5	M			32	3	1	6	99	15	15	15	15			97.2	97.2	97.2	97.2	-0.42	-0.04	15.9	Normal weight	0.31
411	683	LFSL		2005-10-11	2009-10-11	48	4	4	Less than 5	M			28	1	1	8	99	18.7	18.75	18.75	18.73			105.5	105.4	105.4	105.43	0.5	1.06	16.9	Overweight	1.13
412	684	DCO	2047335	2006-01-10	2009-10-11	45	3	3.75274	Less than 5	M			12	1	1	8	99	16	15.95	15.95	15.97			100	100	100.1	100.03	-0.39	0.06	16	Normal weight	0.45
413	690	TCGO	2058399	2006-09-01	2009-10-12	37	3	3.11347	Less than 5	M			35	1	1	9	99	14.95	14.95	15	14.97			98.7	98.8	98.8	98.77	0.48	0.22	15.3	Normal weight	-0.17
414	691	ANS	F392684	2005-11-23	2009-10-12	47	3	3.88653	Less than 5	M			40	1	1	10	99	18.15	18.2	18.2	18.18			104.5	104.6	104.6	104.57	0.49	0.94	16.6	Normal weight	0.96
415	702	PHPM	K382450	2005-05-01	2009-10-14	53	4	4.45228	Less than 5	M			40	3	1	8	99	16.35	16.35	16.4	16.37			106.5	106.6	106.5	106.53	0.04	-0.4	14.4	Normal weight	-0.67
416	706	VGL	2052626	2006-05-21	2009-10-14	41	3	3.39749	Less than 5	M			22	1	1	9	99	16.55	16.6	16.6	16.58			100	100	99.9	99.97	0.22	0.73	16.6	Normal weight	0.86
417	707	VSL	F407549	2007-08-09	2009-10-15	26	2	2.18311	Less than 5	M			22	1	1	9	99	14.4	14.4	14.4	14.4			91	91	91	91	0.63	1.16	17.4	Overweight	1.09
418	713	IPG	G413444	2006-05-02	2009-10-15	41	3	3.45228	Less than 5	M			34	1	1	10	99	17.35	17.35	17.4	17.37			102	102.1	102	102.03	0.63	1.04	16.7	Normal weight	0.94
419	715	KLA	D450171	2006-10-26	2009-10-15	36	3	2.96986	Less than 5	M			11	1	1	9	99	13.45	13.5	13.45	13.47			93	93	93.1	93.03	-0.76	-0.49	15.6	Normal weight	-0.04
420	724	GSO	2056841	2006-07-28	2009-10-16	39	3	3.21712	Less than 5	M			22	1	1	8	99	15.75	15.75	15.8	15.77			100	100.1	100.2	100.1	0.61	0.52	15.7	Normal weight	0.17
421	731	JPSFB	2098382	2007-04-30	2009-10-18	30	2	2.46712	Less than 5	M			34	3	1	10	99	15.7	15.75	15.75	15.73			94.5	94.5	94.6	94.53	0.85	1.46	17.6	Overweight	1.34
422	744	MHMC	2062949	2006-12-17	2009-10-19	34	2	2.83881	Less than 5	M			23	1	1	10	99	18.1	18.1	18.15	18.12			97.2	97.2	97.3	97.23	0.67	2.12	19.2	Obesity	2.47
423	745	CEOS	2047810	2006-01-20	2009-10-20	45	3	3.75	Less than 5	M			17	2	0	0	99	15.55	15.55	15.6	15.57			101.1	101.1	101.2	101.13	-0.12	-0.14	15.2	Normal weight	-0.13
424	752	MAT	2050403	2005-04-21	2009-10-20	54	4	4.49726	Less than 5	M			40	1	1	9	99	18.6	18.65	18.65	18.63			108	108.1	108.1	108.07	0.32	0.54	16	Normal weight	0.52
425	757	GJAL	B324071	2005-06-01	2009-10-20	53	4	4.38539	Less than 5	M			22	1	1	6	99	20.15	20.2	20.2	20.18			110.6	110.6	110.5	110.57	1.07	1.25	16.5	Normal weight	0.91
426	769	LGPT	I253781	2005-08-19	2009-10-22	50	4	4.17489	Less than 5	M			22	1	1	6	99	25.3	25.3	25.35	25.32			109.5	109.6	109.6	109.57	1.19	3.16	21.1	Obesity	3.69
427	770	RPC	2102853	2005-05-30	2009-10-22	53	4	4.39475	Less than 5	M			12	3	1	12	99	22.4	22.45	22.4	22.42			109.3	109.3	109.35	109.32	0.76	2.02	18.8	Obesity	2.34
428	774	DBFS	2060709	2006-10-26	2009-10-26	36	3	3	Less than 5	M			9	1	1	9	99	12.55	12.6	12.6	12.58			93.4	93.4	93.5	93.43	-0.72	-1.09	14.4	Normal weight	-1.01
429	775	VACS	2050119	2006-03-12	2009-10-26	44	3	3.62169	Less than 5	M			40	1	1	10	99	18.3	18.25	18.3	18.28			107.3	107.3	107.4	107.33	1.64	1.26	15.9	Normal weight	0.36
430	805	LROJ	J136147	2005-06-15	2009-10-30	53	4	4.37443	Less than 5	M			35	1	1	4	2	20.05	20.05	20.05	20.05			116.4	116.5	116.4	116.43	2.43	1.21	14.8	Normal weight	-0.38
431	807	RXS	2055500	2006-06-05	2009-10-30	41	3	3.40183	Less than 5	M			38	1	0	0	99	23.15	23.2	23.2	23.18			111	111.1	111	111.03	3.03	3.41	18.8	Obesity	2.36
432	810	AALF	2040867	2005-08-21	2009-11-05	51	4	4.20616	Less than 5	M			12	1	0	0	99	14.55	14.6	14.6	14.58			101	101	101.1	101.03	-0.86	-1.09	14.3	Normal weight	-0.83
433	826	ACD	2060383	2006-05-07	2009-11-09	42	3	3.50548	Less than 5	M			5	1	1	10	99	13	12.95	13	12.98			91.5	91.6	91.6	91.57	-2.1	-1.37	15.5	Normal weight	0.03
434	850	ESR	2054120	2006-05-30	2009-11-13	42	3	3.45342	Less than 5	M			40	1	0	0	99	14.7	14.75	14.7	14.72			97.7	97.6	97.6	97.63	-0.49	-0.29	15.4	Normal weight	-0.01
435	852	LSS	J290871	2005-12-28	2009-11-14	47	3	3.87831	Less than 5	M			22	1	1	4	99	14.65	14.7	14.7	14.68			102.2	102.1	102.1	102.13	-0.09	-0.74	14.1	Normal weight	-1.08
436	854	RSUR	E369245	2005-04-29	2009-11-14	55	4	4.54224	Less than 5	M			6	1	1	6	99	20.6	20.6	20.6	20.6			112.5	112.5	112.5	112.5	1.25	1.25	16.3	Normal weight	0.76
437	855	FSM	2048006	2005-08-13	2009-11-14	51	4	4.25274	Less than 5	M			32	2	1	6	99	20.5	20.5	20.5	20.5			103.5	103.5	103.5	103.5	-0.36	1.49	19.1	Obesity	2.57
438	864	NRSS	2069557	2007-05-13	2009-11-16	30	2	2.50822	Less than 5	M			32	1	1	9	99	9.95	9.95	9.95	9.95			85.5	85.5	85.5	85.5	-1.92	-2.5	13.6	Normal weight	-1.95
439	867	RAR	J0346163	2007-05-28	2009-11-16	30	2	2.46712	Less than 5	M			22	3	1	9	99	14.7	14.75	14.7	14.72			94.2	94.3	94.2	94.23	0.75	0.9	16.6	Normal weight	0.6
440	872	TAXB	2058691	2006-09-09	2009-11-17	38	3	3.18858	Less than 5	M			38	1	1	9	99	16.5	16.55	16.5	16.52			102.1	102.1	102.2	102.13	1.2	0.94	15.8	Normal weight	0.24
441	887	APAR	J370011	2006-08-11	2009-11-21	39	3	3.2774	Less than 5	M			1	1	0	0	99	12.2	12.25	12.25	12.23			95	95	95.1	95.03	-0.83	-1.62	13.5	Normal weight	-1.72
442	888	JVJP	2040970	2005-08-24	2009-11-21	51	4	4.24178	Less than 5	M			22	2	1	10	99	16.05	16.05	16.1	16.07			102.5	102.5	102.4	102.47	-0.58	-0.36	15.3	Normal weight	0.01
443	889	DSO	2043115	2005-10-03	2009-11-22	50	4	4.13539	Less than 5	M			40	1	1	6	99	20.8	20.85	20.8	20.82			110.1	110	110.2	110.1	1.38	1.73	17.2	Overweight	1.36
444	890	RSS	2030538	2005-01-29	2009-11-22	58	4	4.81416	Less than 5	M			1	1	1	8	99	17.55	17.6	17.6	17.58			110	110.1	110	110.03	0.28	-0.16	14.5	Normal weight	-0.55
445	892	NMS	B421378	2007-10-08	2009-11-22	26	2	2.12169	Less than 5	M			11	1	0	0	99	12.2	12.2	12.25	12.22			91	91.1	91.2	91.1	0.86	-0.16	14.7	Normal weight	-1.06
446	896	LYSM	2035374	2005-05-04	2009-11-22	55	4	4.54932	Less than 5	M			22	1	1	6	99	17.8	17.85	17.85	17.83			105	105.1	105	105.03	-0.45	0.16	16.2	Normal weight	0.68
447	900	GNS	2086202	2005-04-12	2009-11-22	55	4	4.61073	Less than 5	M			32	1	1	4	99	21.2	21.25	21.25	21.23			111.3	111.2	111.3	111.27	0.86	1.41	17.1	Overweight	1.35
448	911	JVSR	2055048	2006-06-19	2009-11-24	41	3	3.43037	Less than 5	M			22	1	1	9	99	13.75	13.8	13.8	13.78			95.3	95.3	95.35	95.32	-1.03	-0.8	15.2	Normal weight	-0.24
449	918	GSF	205668	2006-09-08	2009-11-25	39	3	3.21324	Less than 5	M			22	1	1	7	99	12.7	12.75	12.7	12.72			95.3	95.35	95.35	95.33	-0.63	-1.23	14	Normal weight	-1.32
450	919	DSF	2057832	2006-08-19	2009-11-25	39	3	3.26644	Less than 5	M			22	1	0	0	99	16.05	16.1	16.1	16.08			101	100.9	100.9	100.93	0.72	0.63	15.8	Normal weight	0.22
451	920	GRL	2033361	2005-03-26	2009-11-25	56	4	4.66393	Less than 5	M			35	1	1	7	99	16.7	16.75	16.75	16.73			105	105.1	105	105.03	-0.61	-0.42	15.2	Normal weight	-0.05
452	927	JPS	G238906	2004-12-10	2009-11-29	60	5	4.96872	Less than 5	M			22	1	1	4	99	21	21.05	21.05	21.03			111.5	111.6	111.5	111.53	0.38	1.03	16.9	Overweight	1.19
453	936	PGSS	2067840	2007-04-05	2009-11-30	32	2	2.65183	Less than 5	M			12	1	0	0	99	14.25	14.25	14.3	14.27			97	97.1	97	97.03	1.07	0.38	15.2	Normal weight	-0.48
454	938	SXSL	2060286	2006-10-15	2009-11-30	38	3	3.12443	Less than 5	M			10	1	1	9	99	13.2	13.25	13.25	13.23			93.8	93.8	93.85	93.82	-0.86	-0.81	15	Normal weight	-0.43
455	943	JCNC	2058516	2006-09-04	2009-12-03	39	3	3.24726	Less than 5	M			40	1	1	9	99	15.45	15.5	15.5	15.48			102	102.1	102.1	102.07	1.06	0.34	14.9	Normal weight	-0.54
456	948	KMSR	D34582	2007-06-01	2009-12-03	30	2	2.50548	Less than 5	M			38	1	1	8	99	13.9	13.95	13.95	13.93			90.2	90.2	90.2	90.2	-0.53	0.38	17.1	Overweight	1.01
457	952	DAS	2075360	2007-09-17	2009-12-04	27	2	2.21438	Less than 5	M			11	1	1	10	99	15.85	15.8	15.8	15.82			92	92.1	92.1	92.07	0.87	1.92	18.7	Overweight	1.95
458	965	JVHS	2088121	2005-11-29	2009-12-05	48	4	4.01758	Less than 5	M			22	2	0	0	99	19.2	19.25	19.25	19.23			105	105	105	105	0.37	1.24	17.4	Overweight	1.53
459	969	PHS	G330991	2007-03-13	2009-12-05	33	2	2.72808	Less than 5	M			35	1	1	9	99	15.4	15.45	15.4	15.42			95.5	95.5	95.4	95.47	0.43	0.93	16.9	Normal weight	0.94
460	985	GSSS	K322695	2007-01-10	2009-08-11	31	2	2.58607	Less than 5	M			6	1	1	10	99	15.95	15.95	15.95	15.95			93	93.1	93	93.03	0.1	1.41	18.4	Overweight	1.93
461	986	CSS	2058600	2006-09-06	2009-08-25	36	3	2.96872	Less than 5	M			10	1	1	9	99	14.45	14.45	14.45	14.45			101	101	101	101	1.4	0.1	14.2	Normal weight	-1.24
462	990	KGN	2073568	2005-07-06	2009-10-12	51	4	4.26644	Less than 5	M			22	1	1	6	99	16.95	16.95	17	16.97			104.1	104.1	104.2	104.13	-0.23	0.04	15.7	Normal weight	0.28
463	996	NCGS		2005-01-03	2009-11-24	59	4	4.89087	Less than 5	M			37	1	1	7	99	18.65	18.7	18.7	18.68			105.3	105.3	105.3	105.3	-0.86	0.23	16.8	Overweight	1.15

## Sheet: TD STUDY GROUP
	Status	1
	Rótulos de Linha	Contagem de Age - beginning of treatment (years)	Média de Age - beginning of treatment (years)	Mín. de Age - beginning of treatment (years)	Máx. de Age - beginning of treatment (years)	Soma de Age - beginning of treatment (years)
	F	20	9.13314	5.85525	13.5329	182.663
	M	73	9.43463	5.09703	13.7336	688.728
	Total Geral	93	9.36979	5.09703	13.7336	871.391
	Status	1
	Rótulos de Linha	Contagem de RGHC
	F	20
	M	73
	Total Geral	93
	Status	1
	Média de Treatment time (years)	Rótulos de Coluna
	Rótulos de Linha	< 1 year	> 1 year	Total Geral
	F	0.498174	2.76145	2.08247
	M	0.58863	3.56924	2.75264
	Total Geral	0.567756	3.40045	2.60851
	Status	1
	Age class - beginning of treatment	Between 5 and 13
	Contagem de RGHC	Rótulos de Coluna
	Rótulos de Linha	F	M	Total Geral
	Normal weight	13	42	55
	Overweight	5	23	28
	Obesity	2	8	10
	Total Geral	20	73	93
	Status	1
	Age class - beginning of treatment	Between 5 and 13
	Contagem de RGHC	Rótulos de Coluna
	Rótulos de Linha	F	M	Total Geral
	Normal weight	0.65	0.575342	0.591398
	Overweight	0.25	0.315068	0.301075
	Obesity	0.1	0.109589	0.107527
	Total Geral	1	1	1
	Status	1
	Contagem de RGHC	Rótulos de Coluna
	Rótulos de Linha	Thinness	Normal weight	Overweight	Obesity	Total Geral
	Normal weight	2	47	6		55
	Overweight	1	12	14	1	28
	Obesity			4	6	10
	Total Geral	3	59	24	7	93
	Status	1
	Contagem de RGHC	Rótulos de Coluna
	Rótulos de Linha	Thinness	Normal weight	Overweight	Obesity	Total Geral
	Normal weight	0.0363636	0.854545	0.109091	0	1
	Overweight	0.0357143	0.428571	0.5	0.0357143	1
	Obesity	0	0	0.4	0.6	1
	Total Geral	0.0322581	0.634409	0.258065	0.0752688	1
	Status	1
	Rótulos de Linha	Contagem de RGHC
	Increased BMI Z-Score	27
	No variation on BMI Z-Score	2
	Reduced BMI Z-Score	64
	Total Geral	93
	Status	1
	Contagem de RGHC
	1
	Status	1
	Contagem de RGHC
	93

## Sheet: BD  STUDY GROUP
Name	Status	RGHC	Gender	Birth date	Date on diagnosis	Age on diagnosis	Date - beginning of treatment	Age - beginning of treatment (years)	Age class - beginning of treatment	Age - beginning of treatment (months)	Weight - beginning of treatment	Height - beginning of treatment	BMI - beginning of treatment	Median ideal BMI	BMI Z score Class - beginning of treatment	BMI Z score - beginning of treatment - AnthroPlus	BMI Class - beginning of treatment - Anthroplus	Date - End of treatment	Treatment time (days)	Treatment time (years)	Time interval (3 years)	Time interval (1 year)	Age - end of treatment (years)	Age - end of treatment (months)	Weight - end of treatment (Kg)	Height - end of treatment (m)	BMI - end of treatment (Kg/m2)	Median ideal BMI	BMI Z score Class - end of treatment	BMI Z score - end of treatment - AnthroPlus	BMI Class - end of treatment - Anthroplus	Variation of Z-Score (class)	Variation of Z-Score
Acaua Alexandre Jose Dos Santos	1	0006087466E	M	1993-07-17	2004-06-11	10.9002	2003-09-24	10.1858	Between 5 and 13	122	29.1	1.44	14.0336	16.5	Between -2SD and -1SD	-1.77	Normal weight	2010-09-15	2548	6.98082	> 3 years	> 1 year	17.1612	206	51.9	1.79	16.198	21.2	Between -3SD and -2SD	-2.5	Thinness	Reduced BMI Z-Score	-0.73
Lucas Sanchez Ramos	1	0006082765H	M	1991-02-13	2003-05-21	12.2719	2003-05-21	12.2719	Between 5 and 13	147	34.5	1.505	15.2316	17.7	Between -2SD and -1SD	-1.55	Normal weight	2006-05-31	1106	3.03014	> 3 years	> 1 year	15.2993	184	54.2	1.745	17.7995	20	Between -2SD and -1SD	-1.08	Normal weight	Increased BMI Z-Score	0.47
Jonathan Domingues Da Silva	1	6163334A	M	2002-07-19	2013-08-21	11.0888	2014-04-05	11.7116	Between 5 and 13	141	33	1.48	15.0657	17.4	Between -2SD and -1SD	-1.42	Normal weight	2014-12-03	242	0.663014	< 3 years	< 1 year	12.3728	148	38.3	1.56	15.738	17.8	Between -2SD and -1SD	-1.18	Normal weight	Increased BMI Z-Score	0.24
Leonardo De Oliveira Nardo	1	0006087040K	M	1991-02-01	2003-09-10	12.608	2003-09-10	12.608	Between 5 and 13	151	44.2	1.67	15.8485	17.9	Between -2SD and -1SD	-1.17	Normal weight	2007-09-19	1470	4.0274	> 3 years	> 1 year	16.6326	200	83	1.8	25.6173	20.9	Between 1SD and 2SD	1.41	Overweight	Increased BMI Z-Score	2.58
Jose Carlos Silva Faria	1	0006086360I	M	1991-06-20	2004-12-15	13.4863	2004-12-15	13.4863	Between 5 and 13	162	37.5	1.5	16.6667	18.6	Between -2SD and -1SD	-1.01	Normal weight	2007-10-03	1022	2.8	< 3 years	> 1 year	16.2868	195	48.5	1.67	17.3904	20.7	Between -2SD and -1SD	-1.56	Normal weight	Reduced BMI Z-Score	-0.55
Vinícius Costa Dos Santos	1	6174360G	M	2004-08-15	2011-01-05	6.38927	2011-01-05	6.38927	Between 5 and 13	77	18.7	1.15	14.1399	15.4	Between -1SD and 0SD	-0.99	Normal weight	2012-02-08	399	1.09315	< 3 years	> 1 year	7.48082	90	21	1.2	14.5833	15.6	Between -1SD and 0SD	-0.76	Normal weight	Increased BMI Z-Score	0.23
Guilherme Costa Dos Santos	1	6113417H	M	2000-06-16	2005-08-17	5.16941	2006-07-18	6.08881	Between 5 and 13	73	18.5	1.14	14.2351	15.3	Between -1SD and 0SD	-0.87	Normal weight	2008-01-09	540	1.47945	< 3 years	> 1 year	7.56416	91	18.9	1.23	12.4926	15.6	Between -3SD and -2SD	-2.81	Thinness	Reduced BMI Z-Score	-1.94
Caio Rocha Gomes Martins	1	0006091476D	M	1992-01-28	2004-03-03	12.0982	2004-04-14	12.2116	Between 5 and 13	147	40.5	1.58	16.2234	17.7	Between -1SD and 0SD	-0.81	Normal weight	2008-03-05	1421	3.89315	> 3 years	> 1 year	16.1037	193	59.8	1.845	17.5674	20.6	Between -2SD and -1SD	-1.44	Normal weight	Reduced BMI Z-Score	-0.63
Henrique Marinho De Almeida	1	0006081349I	M	1992-05-13	2002-07-17	10.1776	2003-08-27	11.2884	Between 5 and 13	135	36.4	1.52	15.7548	17.1	Between -1SD and 0SD	-0.8	Normal weight	2010-03-17	2394	6.5589	> 3 years	> 1 year	17.8443	214	56	1.78	17.6745	21.6	Between -2SD and -1SD	-1.75	Normal weight	Reduced BMI Z-Score	-0.95
Luiz Felipe Ribeiro	1	0006086060J	M	1993-06-23	2003-10-08	10.2922	2004-09-15	11.2281	Between 5 and 13	135	25.8	1.28	15.7471	17.1	Between -1SD and 0SD	-0.78	Normal weight	2010-03-03	1995	5.46575	> 3 years	> 1 year	16.6952	200	49	1.66	17.782	20.9	Between -2SD and -1SD	-1.43	Normal weight	Reduced BMI Z-Score	-0.65
Julia Mancini Simões	1	6182954H	F	2004-02-05	2011-09-28	7.64635	2011-10-19	7.70502	Between 5 and 13	92	23	1.26	14.4873	15.6	Between -1SD and 0SD	-0.68	Normal weight	2013-08-21	672	1.8411	< 3 years	> 1 year	9.54384	115	30	1.36	16.2197	16.4	Beween -1SD and 0SD	-0.08	Normal weight	Increased BMI Z-Score	0.6
Giovani Dos Santos Pereira	1	0006149942B	M	1999-03-25	2008-08-27	9.42215	2008-08-27	9.42215	Between 5 and 13	113	22.6	1.22	15.1841	16.2	Between -1SD and 0SD	-0.67	Normal weight	2012-11-21	1547	4.23836	> 3 years	> 1 year	13.6557	164	32.5	1.42	16.1178	18.7	Between -2SD and -1SD	-1.42	Normal weight	Reduced BMI Z-Score	-0.75
Gabriel Shiino Noleto	1	0006106209H	M	1996-06-11	2005-05-10	8.91393	2005-05-10	8.91393	Between 5 and 13	107	22.5	1.215	15.2416	16	Between -1SD and 0SD	-0.61	Normal weight	2009-02-04	1366	3.74247	> 3 years	> 1 year	12.6475	152	27.65	1.33	15.6312	18	Between -2SD and -1SD	-1.35	Normal weight	Reduced BMI Z-Score	-0.74
Graziele De Souza	1	0006101069A	F	1994-01-23	2004-11-03	10.7785	2004-11-03	10.7785	Between 5 and 13	129	26	1.28	15.8691	17.1	Between -1SD and 0SD	-0.61	Normal weight	2007-11-21	1113	3.04932	> 3 years	> 1 year	13.8279	166	41.9	1.48	19.1289	19.4	Beween -1SD and 0SD	-0.12	Normal weight	Increased BMI Z-Score	0.49
Igor De Souza Ferreira	1	0013846862A	M	1997-06-22	2009-03-15	11.7308	2009-05-17	11.903	Between 5 and 13	143	30	1.35	16.4609	17.5	Between -1SD and 0SD	-0.55	Normal weight	2009-08-19	94	0.257534	< 3 years	< 1 year	12.1584	146	32	1.38	16.8032	17.6	Between -1SD and 0SD	-0.44	Normal weight	Increased BMI Z-Score	0.11
Vitor Eduardo Dos Santos	1	0006161784B	M	1999-04-11	2009-09-30	10.4687	2010-02-12	10.8361	Between 5 and 13	130	35.8	1.5	15.9111	16.9	Between -1SD and 0SD	-0.55	Normal weight	2013-03-06	1118	3.06301	> 3 years	> 1 year	13.903	167	45.5	1.63	17.1252	18.9	Between -1SD and 0SD	-0.9	Normal weight	Reduced BMI Z-Score	-0.35
Gabriel Gaspar De Sousa	1	0006107837E	M	1997-12-11	2003-12-03	5.97808	2003-12-03	5.97808	Between 5 and 13	72	22	1.22	14.781	15.3	Between -1SD and 0SD	-0.41	Normal weight	2006-06-07	917	2.51233	< 3 years	> 1 year	8.48904	102	26	1.33	14.6984	15.9	Between -1SD and 0SD	-0.84	Normal weight	Reduced BMI Z-Score	-0.43
Daniel Josino Gomes Lima	1	0006080881A	M	1995-02-08	2002-11-13	7.7637	2003-03-19	8.11347	Between 5 and 13	97	25	1.28	15.2588	15.8	Between -1SD and 0SD	-0.35	Normal weight	2004-09-15	546	1.49589	< 3 years	> 1 year	9.60251	115	25.2	1.355	13.7253	16.3	Between -2SD and -1SD	-2	Normal weight	Reduced BMI Z-Score	-1.65
Gabriel Alexandre Antunes Rodrigues	1	0006142422H	M	1997-11-18	2008-03-19	10.3361	2008-03-19	10.3361	Between 5 and 13	124	27.9	1.32	16.0124	16.6	Between -1SD and 0SD	-0.34	Normal weight	2012-03-14	1456	3.98904	> 3 years	> 1 year	14.3224	172	47.1	1.628	17.771	19.3	Between -1SD and 0SD	-0.72	Normal weight	Reduced BMI Z-Score	-0.38
Gustavo Dos Santos Pereira	1	0006149940D	M	1999-03-25	2008-08-27	9.42215	2008-08-27	9.42215	Between 5 and 13	113	23.7	1.23	15.6653	16.2	Between -1SD and 0SD	-0.34	Normal weight	2012-11-21	1547	4.23836	> 3 years	> 1 year	13.6557	164	34	1.41	17.1018	18.7	Between -1SD and 0SD	-0.82	Normal weight	Reduced BMI Z-Score	-0.48
Natalia Oliveira Da Silva	1	0013459546K	F	1994-12-30	2003-01-22	8.06142	2003-05-21	8.39201	Between 5 and 13	101	23.5	1.24	15.2836	15.8	Between -1SD and 0SD	-0.32	Normal weight	2006-05-17	1092	2.99178	< 3 years	> 1 year	11.3811	137	32	1.44	15.4321	17.5	Between -2SD and -1SD	-1.09	Normal weight	Reduced BMI Z-Score	-0.77
Flavia Murgolo Marcelino	1	0003192563G	F	1995-03-29	2002-04-10	7.03128	2002-07-03	7.2621	Between 5 and 13	87	24.5	1.28	14.9536	15.5	Between -1SD and 0SD	-0.31	Normal weight	2003-10-01	455	1.24658	< 3 years	> 1 year	8.50662	102	24	1.33	13.5678	15.9	Between -2SD and -1SD	-1.52	Normal weight	Reduced BMI Z-Score	-1.21
Henrique Souza Vieira	1	33513704I	M	2003-11-12	2011-09-21	7.85799	2011-11-09	7.99178	Between 5 and 13	96	21.4	1.18	15.3691	15.7	Between -1SD and 0SD	-0.25	Normal weight	2013-07-17	616	1.68767	< 3 years	> 1 year	9.68037	116	26	1.27	16.12	16.3	Between -1SD and 0SD	-0.11	Normal weight	Increased BMI Z-Score	0.14
Davi Alcântara De Moura	1	6171284E	M	1999-07-21	2011-05-11	11.8059	2011-07-06	11.9589	Between 5 and 13	144	40	1.53	17.0874	17.5	Between -1SD and 0SD	-0.23	Normal weight	2012-03-28	266	0.728767	< 3 years	< 1 year	12.6858	152	46	1.61	17.7462	18	Between -1SD and 0SD	-0.12	Normal weight	Increased BMI Z-Score	0.11
Thainara Silva Ferreira Marculino	1	0003366486H	F	1994-09-16	2002-06-26	7.7774	2002-06-26	7.7774	Between 5 and 13	93	27	1.33	15.2637	15.6	Between -1SD and 0SD	-0.2	Normal weight	2005-02-23	973	2.66575	< 3 years	> 1 year	10.4358	125	38.5	1.53	16.4467	16.9	Beween -1SD and 0SD	-0.2	Normal weight	No variation on BMI Z-Score	0
Yago Jacobini Von Lehmann	1	0006083018J	M	1997-03-04	2003-01-08	5.84429	2003-01-08	5.84429	Between 5 and 13	70	21	1.18	15.0819	15.3	Between -1SD and 0SD	-0.16	Normal weight	2004-04-21	469	1.28493	< 3 years	> 1 year	7.12991	86	23.2	1.245	14.9675	15.5	Between -1SD and 0SD	-0.5	Normal weight	Reduced BMI Z-Score	-0.34
Andrey Aleksander Romanoff Micheletto	1	0006086204E	M	1995-05-24	2003-08-06	8.20068	2003-08-06	8.20068	Between 5 and 13	98	26.6	1.3	15.7396	15.8	Between -1SD and 0SD	-0.03	Normal weight	2005-03-16	588	1.61096	< 3 years	> 1 year	9.81142	118	30	1.36	16.2197	16.4	Between -1SD and 0SD	-0.09	Normal weight	Reduced BMI Z-Score	-0.06
Uyara Siqueira Pinheiro	1	0006101402J	F	1998-03-05	2004-02-11	5.93311	2004-03-10	6.0137	Between 5 and 13	72	21.6	1.19	15.2532	15.3	Between -1SD and 0SD	-0.01	Normal weight	2012-08-22	3087	8.45753	> 3 years	> 1 year	14.4632	174	47	1.7	16.263	19.9	Between -2SD and -1SD	-1.65	Normal weight	Reduced BMI Z-Score	-1.64
Geovanna Romeiro De Paiva	1	0006182558I	F	2002-12-28	2011-09-14	8.71164	2011-09-14	8.71164	Between 5 and 13	105	25	1.25	16	16	0SD	0.01	Normal weight	2012-10-31	413	1.13151	< 3 years	> 1 year	9.84155	118	28	1.37	14.9182	16.5	Beween -1SD and 0SD	-0.9	Normal weight	Reduced BMI Z-Score	-0.91
Enzo Messias Nicolau De Souza	1	0006170906D	M	2001-05-21	2010-07-21	9.16667	2010-07-21	9.16667	Between 5 and 13	110	28.8	1.325	16.4044	16.1	Between 0SD and 1SD	0.1	Normal weight	2011-07-20	364	0.99726	< 3 years	< 1 year	10.1639	122	29	1.38	15.2279	16.5	Between -1SD and 0SD	-0.82	Normal weight	Reduced BMI Z-Score	-0.92
Andre Igor Ferreira Oliveira	1	0006106607E	M	1996-10-10	2005-02-23	8.36895	2005-02-23	8.36895	Between 5 and 13	100	28	1.32	16.0698	15.8	Between 0SD and 1SD	0.13	Normal weight	2011-07-06	2324	6.36712	> 3 years	> 1 year	14.739	177	52.7	1.71	18.0226	19.6	Between -1SD and 0SD	-0.72	Normal weight	Reduced BMI Z-Score	-0.85
Gustavo Thomaz Bogado Barros Prieto	1	13807084K	M	2000-11-02	2007-10-09	6.93584	2007-11-28	7.07123	Between 5 and 13	85	25	1.26	15.747	15.5	Between 0SD and 1SD	0.17	Normal weight	2013-10-23	2156	5.90685	> 3 years	> 1 year	12.9742	156	54.7	1.68	19.3807	18.2	Between 0SD and 1SD	0.49	Normal weight	Increased BMI Z-Score	0.32
Felipe Martins De Oliveira	1	0006081675C	M	1991-09-28	2002-10-16	11.0505	2005-06-22	13.7336	Between 5 and 13	165	49.2	1.585	19.5842	18.8	Between 0SD and 1SD	0.27	Normal weight	2006-10-18	483	1.32329	< 3 years	> 1 year	15.0559	181	59	1.68	20.9042	19.8	Between 0SD and 1SD	0.41	Normal weight	Increased BMI Z-Score	0.14
Julia Millena De Souza	1	6170056C	F	2002-06-04	2010-10-27	8.39635	2011-07-20	9.12717	Between 5 and 13	110	36	1.46	16.8887	16.2	Between 0SD and 1SD	0.35	Normal weight	2011-11-23	126	0.345205	< 3 years	< 1 year	9.46872	114	35	1.47	16.197	16.3	Beween -1SD and 0SD	-0.07	Normal weight	Reduced BMI Z-Score	-0.42
Julio Cesar Pereira Souza	1	0006185510C	M	2003-05-20	2013-05-08	9.96712	2013-05-08	9.96712	Between 5 and 13	120	32.7	1.38	17.1708	16.4	Between 0SD and 1SD	0.39	Normal weight	2014-02-19	287	0.786301	< 3 years	< 1 year	10.7473	129	33.5	1.42	16.6138	16.8	Between -1SD and 0SD	-0.11	Normal weight	Reduced BMI Z-Score	-0.5
Paulo Sergio Dias Costa	1	0006084130C	M	1990-11-21	2003-10-22	12.9194	2004-02-04	13.2034	Between 5 and 13	158	43.5	1.5	19.3333	18.4	Between 0SD and 1SD	0.39	Normal weight	2008-03-12	1498	4.10411	> 3 years	> 1 year	17.3087	208	63.2	1.68	22.3923	21.3	Between 0SD and 1SD	0.37	Normal weight	Reduced BMI Z-Score	-0.02
Sandro Da Silva Coelho	1	0006133082G	M	1997-05-25	2007-03-21	9.82237	2007-06-13	10.0505	Between 5 and 13	121	34.2	1.405	17.325	16.5	Between 0SD and 1SD	0.39	Normal weight	2008-04-02	294	0.805479	< 3 years	< 1 year	10.8537	130	34.6	1.445	16.5707	16.9	Between -1SD and 0SD	-0.22	Normal weight	Reduced BMI Z-Score	-0.61
Thiago Luiz Nogueira	1	0006125706F	M	1994-03-02	2006-08-30	12.4934	2006-08-30	12.4934	Between 5 and 13	150	45.6	1.55	18.9802	17.9	Between 0SD and 1SD	0.49	Normal weight	2009-01-04	858	2.35068	< 3 years	> 1 year	14.8388	178	64.8	1.755	21.0388	19.6	Between 0SD and 1SD	0.48	Normal weight	Reduced BMI Z-Score	-0.01
Edna Micaela Dombaxe Da Conceicao	1	N/I1	F	2001-05-13	2009-07-01	8.13379	2009-07-01	8.13379	Between 5 and 13	98	30	1.34	16.7075	15.7	Between 0SD and 1SD	0.5	Normal weight	2010-05-11	314	0.860274	< 3 years	< 1 year	8.99452	108	33.5	1.42	16.6138	16.1	Between 0SD and 1SD	0.26	Normal weight	Reduced BMI Z-Score	-0.24
Renato De Almeida Leao	1	N/I2	M	2002-05-27	2009-07-01	7.09543	2009-08-26	7.24726	Between 5 and 13	87	22.7	1.15	17.1645	15.5	Between 1SD and 2SD	1.02	Overweight	2010-04-14	231	0.632877	< 3 years	< 1 year	7.88105	95	22.8	1.19	16.1006	15.7	Between 0SD and 1SD	0.25	Normal weight	Reduced BMI Z-Score	-0.77
Vinicius De Souza Rocha	1	N/I3	M	1997-09-08	2005-05-18	7.69406	2005-05-18	7.69406	Between 5 and 13	92	23.6	1.16	17.5386	15.6	Between 1SD and 2SD	1.13	Overweight	2009-01-05	1328	3.63836	> 3 years	> 1 year	11.3251	136	33.5	1.37	17.8486	17.1	Between 0SD and 1SD	0.35	Normal weight	Reduced BMI Z-Score	-0.78
Vinicius Ivo Rocha Monteiro Correa	1	0006087732F	M	1990-08-07	2003-06-26	12.8854	2003-06-26	12.8854	Between 5 and 13	155	33.8	1.32	19.3985	18.2	Between 0SD and 1SD	0.52	Normal weight	2004-03-17	265	0.726027	< 3 years	< 1 year	13.6107	163	38.5	1.39	19.9265	18.7	Between 0SD and 1SD	0.51	Normal weight	Reduced BMI Z-Score	-0.01
Patrick Ferreira De Souza	1	0006120225B	M	1999-06-09	2006-06-21	7.03288	2006-09-13	7.26096	Between 5 and 13	87	27	1.28	16.4795	15.5	Between 0SD and 1SD	0.62	Normal weight	2008-06-11	637	1.74521	< 3 years	> 1 year	9.00548	108	32.6	1.37	17.3691	16	Between 0SD and 1SD	0.74	Normal weight	Increased BMI Z-Score	0.12
Fillipe Hypolito Jorge	1	6196979D	M	2004-04-09	2013-02-27	8.88265	2013-02-27	8.88265	Between 5 and 13	107	35	1.43	17.1158	16	Between 0SD and 1SD	0.63	Normal weight	2013-06-19	112	0.306849	< 3 years	< 1 year	9.19406	110	34.2	1.45	16.2663	16.1	Between 0SD and 1SD	0.1	Normal weight	Reduced BMI Z-Score	-0.53
Ian Godel Mesquita Schrader	1	0013455119I	M	1995-09-08	2003-08-13	7.93037	2003-08-13	7.93037	Between 5 and 13	95	28.7	1.31	16.724	15.7	Between 0SD and 1SD	0.63	Normal weight	2009-03-31	2057	5.63562	> 3 years	> 1 year	13.563	163	65.3	1.71	22.3317	18.7	Between 1SD and 2SD	1.28	Overweight	Increased BMI Z-Score	0.65
Manoela Alves Dos Santos	1	6178474I	F	1998-07-06	2011-08-31	13.1518	2011-08-31	13.1518	Between 5 and 13	158	56	1.64	20.8209	18.9	Between 0SD and 1SD	0.66	Normal weight	2013-10-09	770	2.10959	< 3 years	> 1 year	15.2582	183	62	1.67	22.231	20.4	Between 0SD and 1SD	0.6	Normal weight	Reduced BMI Z-Score	-0.06
Luis Fernando De Carvalho Rosa	1	0006132852K	M	1996-06-19	2007-03-14	10.7363	2007-05-02	10.8701	Between 5 and 13	130	40	1.48	18.2615	16.9	Between 0SD and 1SD	0.68	Normal weight	2007-10-17	168	0.460274	< 3 years	< 1 year	11.3279	136	37.9	1.5	16.8444	17.1	Between -1SD and 0SD	-0.15	Normal weight	Reduced BMI Z-Score	-0.83
Thiago Maia Rodrigues De Oliveira	1	0006129426C	M	2000-08-07	2007-06-20	6.86895	2007-09-12	7.09703	Between 5 and 13	85	24.6	1.22	16.5278	15.5	Between 0SD and 1SD	0.68	Normal weight	2011-11-09	1519	4.16164	> 3 years	> 1 year	11.2555	135	37	1.46	17.3579	17.1	Between 0SD and 1SD	0.14	Normal weight	Reduced BMI Z-Score	-0.54
Lucas Coutinho Nunes	1	6069041A	M	1997-09-13	2005-01-06	7.31416	2005-05-18	7.68037	Between 5 and 13	92	27.5	1.275	16.9166	15.6	Between 0SD and 1SD	0.71	Normal weight	2006-04-12	329	0.90137	< 3 years	< 1 year	8.58059	103	31.5	1.355	17.1566	15.9	Between 0SD and 1SD	0.66	Normal weight	Reduced BMI Z-Score	-0.05
Cassio Henrique De Almeida Silva	1	0006113713K	M	1999-10-24	2006-09-13	6.88653	2006-09-13	6.88653	Between 5 and 13	83	28.4	1.305	16.6762	15.5	Between 0SD and 1SD	0.72	Normal weight	2006-10-18	35	0.0958904	< 3 years	< 1 year	6.98356	84	29	1.31	16.8988	15.5	Between 0SD and 1SD	0.91	Normal weight	Increased BMI Z-Score	0.19
Adalberto Etelvino Chaves	1	0006148511K	M	2002-04-19	2008-07-16	6.24178	2008-10-22	6.50822	Between 5 and 13	78	25.1	1.23	16.5907	15.4	Between 0SD and 1SD	0.82	Normal weight	2011-10-19	1092	2.99178	< 3 years	> 1 year	9.5	114	40	1.39	20.7029	16.2	Between 1SD and 2SD	1.93	Overweight	Increased BMI Z-Score	1.11
Jefferson De Oliveira Gazito	1	0006089145C	M	1994-12-15	2004-01-15	9.08333	2004-01-15	9.08333	Between 5 and 13	109	29.7	1.3	17.574	16.1	Between 0SD and 1SD	0.82	Normal weight	2012-09-05	3156	8.64658	> 3 years	> 1 year	17.7226	213	59	1.69	20.6575	21.6	Between -1SD and 0SD	-0.35	Normal weight	Reduced BMI Z-Score	-1.17
Julia Santis Aoki	1	13847842B	F	2000-07-03	2008-10-21	8.29932	2008-10-21	8.29932	Between 5 and 13	100	28.2	1.27	17.484	15.8	Between 0SD and 1SD	0.82	Normal weight	2014-09-24	2164	5.92877	> 3 years	> 1 year	14.2242	171	50	1.6	19.5312	19.7	Beween -1SD and 0SD	-0.08	Normal weight	Reduced BMI Z-Score	-0.9
Carolina De Oliveira Souza	1	0006126392E	F	1993-09-10	2006-12-06	13.239	2006-12-06	13.239	Between 5 and 13	159	57	1.63	21.4536	19	Between 0SD and 1SD	0.83	Normal weight	2008-03-19	469	1.28493	< 3 years	> 1 year	14.5247	174	62.5	1.64	23.2377	19.9	Between 1SD and 2SD	1.02	Overweight	Increased BMI Z-Score	0.19
Mayara Goncalves De Jesus	1	0006140401C	F	1995-10-17	2009-04-29	13.5329	2009-04-29	13.5329	Between 5 and 13	162	56.6	1.6	22.1094	19.2	Between 0SD and 1SD	0.93	Normal weight	2009-09-02	126	0.345205	< 3 years	< 1 year	13.8756	167	60	1.61	23.1473	19.5	Between 1SD and 2SD	1.13	Overweight	Increased BMI Z-Score	0.2
Arthur Kenji Suguita Dos Santos	1	0013650420C	M	2004-09-18	2010-07-21	5.84155	2010-10-27	6.10799	Between 5 and 13	73	21	1.12	16.7411	15.3	Between 0SD and 1SD	0.98	Normal weight	2013-06-26	973	2.66575	< 3 years	> 1 year	8.77192	105	30	1.32	17.2176	16	Between 0SD and 1SD	0.72	Normal weight	Reduced BMI Z-Score	-0.26
José Augusto Aguiar Da Silva Pereira	1	6110667K	M	2003-07-14	2011-01-26	7.53288	2011-01-26	7.53288	Between 5 and 13	90	26.5	1.24	17.2347	15.6	Between 1SD and 2SD	0.98	Normal weight	2013-08-28	945	2.58904	< 3 years	> 1 year	10.1217	121	35	1.37	18.6478	16.5	Between 1SD and 2SD	1.03	Overweight	Increased BMI Z-Score	0.05
Bruno Henrique Lourenco Lima	1	0006172858C	M	2001-10-29	2010-11-03	9.0121	2010-11-03	9.0121	Between 5 and 13	108	29.8	1.29	17.9076	16	Between 1SD and 2SD	1	Overweight	2011-12-07	399	1.09315	< 3 years	> 1 year	10.1064	121	34.5	1.35	18.93	16.5	Between 1SD and 2SD	1.16	Overweight	Increased BMI Z-Score	0.16
Douglas Souza Vieira	1	33513703J	M	2003-11-12	2013-04-03	9.39201	2013-07-17	9.68037	Between 5 and 13	116	30	1.28	18.3105	16.3	Between 1SD and 2SD	1.01	Overweight	2013-09-25	70	0.191781	< 3 years	< 1 year	9.86895	118	30.5	1.29	18.3282	16.4	Between 0SD and 1SD	0.96	Normal weight	Reduced BMI Z-Score	-0.05
Julio Cesar De Paula Silva Júnior	1	13594761G	M	1997-10-30	2005-03-30	7.41667	2005-03-30	7.41667	Between 5 and 13	89	30	1.315	17.3488	15.6	Between 1SD and 2SD	1.01	Overweight	2010-07-14	1932	5.29315	> 3 years	> 1 year	12.7062	152	60	1.69	21.0077	18	Between 1SD and 2SD	1.13	Overweight	Increased BMI Z-Score	0.12
Caiua Camilo Jose Dos Santos	1	0006107672F	M	1996-01-30	2005-04-20	9.2226	2005-04-20	9.2226	Between 5 and 13	111	35	1.39	18.115	16.1	Between 1SD and 2SD	1.03	Overweight	2007-06-13	784	2.14795	< 3 years	> 1 year	11.3701	136	41	1.59	16.2177	17.1	Between -1SD and 0SD	-0.54	Normal weight	Reduced BMI Z-Score	-1.57
Rhuan Higor Pacheco Dos Santos	1	0006087876H	M	1997-03-17	2003-07-02	6.29224	2004-04-14	7.07511	Between 5 and 13	85	23.5	1.17	17.1671	15.5	Between 1SD and 2SD	1.05	Overweight	2012-08-01	3031	8.30411	> 3 years	> 1 year	15.3728	184	57	1.63	21.4536	20	Between 0SD and 1SD	0.5	Normal weight	Reduced BMI Z-Score	-0.55
Lucas Alves Machado	1	0006111749F	M	1996-04-16	2006-03-08	9.89475	2006-09-06	10.3893	Between 5 and 13	125	36.3	1.38	19.0611	16.6	Between 1SD and 2SD	1.12	Overweight	2010-11-10	1526	4.18082	> 3 years	> 1 year	14.5669	175	51.3	1.665	18.505	19.5	Between -1SD and 0SD	-0.48	Normal weight	Reduced BMI Z-Score	-1.6
Heitor Antunes De Almeida	1	14047401B	M	2001-05-12	2013-07-24	12.1995	2013-12-17	12.597	Between 5 and 13	151	64	1.74	21.1389	17.9	Between 1SD and 2SD	1.22	Overweight	2014-09-24	281	0.769863	< 3 years	< 1 year	13.3662	160	69.5	1.8	21.4506	18.5	Between 1SD and 2SD	1.07	Overweight	Reduced BMI Z-Score	-0.15
Mayara Rodrigues Do Carmo	1	0003361592H	F	1994-05-09	2003-04-02	8.89749	2003-08-27	9.29932	Between 5 and 13	112	36	1.36	19.4637	16.3	Between 1SD and 2SD	1.32	Overweight	2005-03-09	560	1.53425	< 3 years	> 1 year	10.8333	130	45	1.46	21.1109	17.1	Between 1SD and 2SD	1.42	Overweight	Increased BMI Z-Score	0.1
Rodrigo Damaceno	1	0013475959H	M	1994-12-30	2005-05-11	10.3646	2005-09-14	10.7062	Between 5 and 13	128	37.1	1.35	20.3567	16.8	Between 1SD and 2SD	1.48	Overweight	2006-08-30	350	0.958904	< 3 years	< 1 year	11.6667	140	41.5	1.4	21.1735	17.3	Between 1SD and 2SD	1.48	Overweight	No variation on BMI Z-Score	0
Gustavo Cesar Santos Silva	1	0006102274A	M	1999-06-16	2004-07-21	5.09703	2004-07-21	5.09703	Between 5 and 13	61	23.5	1.16	17.4643	15.3	Between 1SD and 2SD	1.53	Overweight	2007-09-05	1141	3.12603	> 3 years	> 1 year	8.21986	99	30.6	1.345	16.9152	15.8	Between 0SD and 1SD	0.6	Normal weight	Reduced BMI Z-Score	-0.93
Bruna Otilia Bernardo Da Franca Lemos	1	0003294670H	F	1996-06-26	2004-04-28	7.83881	2004-11-10	8.37283	Between 5 and 13	100	33	1.3	19.5266	15.8	Between 1SD and 2SD	1.57	Overweight	2005-03-23	133	0.364384	< 3 years	< 1 year	8.74178	105	33	1.33	18.6557	16	Between 1SD and 2SD	1.19	Overweight	Reduced BMI Z-Score	-0.38
Wenderson Alessandro Da Silva	1	0006172848F	M	2002-10-30	2010-10-06	7.93425	2010-10-06	7.93425	Between 5 and 13	95	31	1.285	18.7739	15.7	Between 1SD and 2SD	1.59	Overweight	2011-02-23	140	0.383562	< 3 years	< 1 year	8.31416	100	32	1.33	18.0903	15.8	Between 1SD and 2SD	1.24	Overweight	Reduced BMI Z-Score	-0.35
Leonardo Silva Vecchio	1	0006101480J	M	1994-04-06	2004-08-11	10.347	2004-08-11	10.347	Between 5 and 13	124	43	1.45	20.4518	16.6	Between 1SD and 2SD	1.63	Overweight	2006-02-15	553	1.51507	< 3 years	> 1 year	11.858	142	48.8	1.535	20.7111	17.4	Between 1SD and 2SD	1.26	Overweight	Reduced BMI Z-Score	-0.37
Rafael Levi Oliveira Lanzarini	1	12510987K	M	1995-12-27	2006-11-15	10.8838	2007-02-14	11.1311	Between 5 and 13	134	44	1.44	21.2191	17	Between 1SD and 2SD	1.63	Overweight	2010-08-11	1274	3.49041	> 3 years	> 1 year	14.6228	175	61	1.74	20.148	19.5	Between 0SD and 1SD	0.25	Normal weight	Reduced BMI Z-Score	-1.38
Jonathan Queiros Da Silva	1	0003275892J	M	1997-09-13	2006-06-07	8.73356	2006-10-04	9.05868	Between 5 and 13	109	36.7	1.37	19.5535	16.1	Between 1SD and 2SD	1.66	Overweight	2012-05-16	2051	5.61918	> 3 years	> 1 year	14.6749	176	74	1.75	24.1633	19.5	Between 1SD and 2SD	1.47	Overweight	Reduced BMI Z-Score	-0.19
Lucas De Oliveira Alves Garcia	1	0006104044H	M	1994-12-16	2004-09-08	9.72808	2004-11-24	9.93858	Between 5 and 13	119	46.4	1.51	20.35	16.4	Between 1SD and 2SD	1.71	Overweight	2010-03-10	1932	5.29315	> 3 years	> 1 year	15.2336	183	54	1.84	15.9499	20	Between -3SD and -2SD	-2.13	Thinness	Reduced BMI Z-Score	-3.84
Roberto Cavalcante Silva Junior	1	0006118831K	M	1995-05-04	2006-06-14	11.1107	2006-09-27	11.3963	Between 5 and 13	137	48.25	1.49	21.7333	17.2	Between 1SD and 2SD	1.71	Overweight	2013-05-07	2414	6.6137	> 3 years	> 1 year	18.0082	216	64.8	1.65	23.8017	21.7	Between 0SD and 1SD	0.68	Normal weight	Reduced BMI Z-Score	-1.03
Stephanie Caroline Rodrigues Carlos	1	13922936E	F	2000-10-10	2010-06-01	9.64201	2010-06-01	9.64201	Between 5 and 13	116	44.5	1.45	21.1653	16.4	Between 1SD and 2SD	1.74	Overweight	2012-07-03	763	2.09041	< 3 years	> 1 year	11.7308	141	62.5	1.6	24.4141	17.8	Between 1SD and 2SD	1.95	Overweight	Increased BMI Z-Score	0.21
Carolina Lopes Do Nascimento	1	0006099183I	F	1994-09-09	2002-04-17	7.60525	2003-07-16	8.85251	Between 5 and 13	106	41.5	1.42	20.5812	16	Between 1SD and 2SD	1.79	Overweight	2005-06-01	686	1.87945	< 3 years	> 1 year	10.7281	129	61.5	1.57	24.9503	17.1	Between 2SD and 3SD	2.3	Obesity	Increased BMI Z-Score	0.51
Jose Roberto Zanetta Quintas Junior	1	0006133083F	M	1995-01-11	2007-03-28	12.2132	2007-03-28	12.2132	Between 5 and 13	147	62.4	1.65	22.9201	17.7	Between 1SD and 2SD	1.79	Overweight	2009-05-27	791	2.16712	< 3 years	> 1 year	14.3772	173	66	1.9	18.2825	19.3	Between -1SD and 0SD	-0.47	Normal weight	Reduced BMI Z-Score	-2.26
Caio Henrique Do Nascimento	1	0006080885H	M	1998-03-08	2002-09-18	4.5274	2006-03-08	8	Between 5 and 13	96	29	1.23	19.1685	15.7	Between 1SD and 2SD	1.8	Overweight	2010-07-07	1582	4.33425	> 3 years	> 1 year	12.3306	148	40.3	1.47	18.6496	17.8	Between 0SD and 1SD	0.4	Normal weight	Reduced BMI Z-Score	-1.4
Marcos Alberto Vieira Dos Santos	1	0006161586H	M	1999-05-07	2010-03-31	10.8991	2010-03-31	10.8991	Between 5 and 13	131	42.5	1.4	21.6837	16.9	Between 1SD and 2SD	1.83	Overweight	2012-02-01	672	1.8411	< 3 years	> 1 year	12.7336	153	51.4	1.55	21.3944	18	Between 1SD and 2SD	1.25	Overweight	Reduced BMI Z-Score	-0.58
Bianca Nascimento Souza	1	0006111751K	F	1997-04-29	2006-09-22	9.39749	2006-09-22	9.39749	Between 5 and 13	113	35	1.28	21.3623	16.3	Between 1SD and 2SD	1.85	Overweight	2009-03-04	894	2.44932	< 3 years	> 1 year	11.8482	142	49.4	1.42	24.4991	17.9	Between 1SD and 2SD	1.95	Overweight	Increased BMI Z-Score	0.1
Paulo Tomouyki Aoki Junior	1	13897250F	M	2004-07-17	2013-10-16	9.24726	2013-10-16	9.24726	Between 5 and 13	111	40.8	1.415	20.3773	16.1	Between 1SD and 2SD	1.85	Overweight	2014-09-24	343	0.939726	< 3 years	< 1 year	10.1858	122	44.2	1.48	20.179	16.5	Between 1SD and 2SD	1.58	Overweight	Reduced BMI Z-Score	-0.27
Rafael Pagliara Steiman	1	0006181938D	M	2000-04-18	2011-08-24	11.3498	2011-08-31	11.3689	Between 5 and 13	136	52	1.51	22.806	17.1	Between 2SD and 3SD	1.97	Overweight	2012-04-25	238	0.652055	< 3 years	< 1 year	12.0192	144	54	1.54	22.7694	17.5	Between 1SD and 2SD	1.81	Overweight	Reduced BMI Z-Score	-0.16
Fabricio Ferreira Ribeiro Dos Santos	1	0006145310B	M	1998-12-09	2008-04-16	9.35251	2008-04-16	9.35251	Between 5 and 13	112	37.8	1.35	20.7407	16.2	Between 1SD and 2SD	1.99	Overweight	2013-01-30	1750	4.79452	> 3 years	> 1 year	14.1409	170	53.5	1.61	20.6396	19.1	Between 0SD and 1SD	0.58	Normal weight	Reduced BMI Z-Score	-1.41
Rogerio Damaceno	1	0003331116G	M	1994-12-30	2006-05-03	11.3427	2006-08-23	11.6475	Between 5 and 13	140	45.5	1.4	23.2143	17.3	Between 2SD and 3SD	2	Obesity	2006-12-06	105	0.287671	< 3 years	< 1 year	11.9342	143	47.6	1.42	23.6064	17.5	Between 2SD and 3SD	2.03	Obesity	Increased BMI Z-Score	0.03
Philip Hideki Alexandrino	1	0006126168E	M	1993-12-28	2006-08-23	12.653	2006-08-23	12.653	Between 5 and 13	152	68	1.65	24.977	18	Between 2SD and 3SD	2.12	Obesity	2009-03-11	931	2.55068	< 3 years	> 1 year	15.2034	182	98.7	1.73	32.978	19.9	Between 2SD and 3SD	2.86	Obesity	Increased BMI Z-Score	0.74
Pedro Henrique Neto	1	0006061769J	M	1998-11-19	2006-08-09	7.7226	2006-08-09	7.7226	Between 5 and 13	93	49	1.55	20.3954	15.7	Between 2SD and 3SD	2.34	Obesity	2007-08-22	378	1.03562	< 3 years	> 1 year	8.75822	105	55	1.61	21.2183	16	Between 2SD and 3SD	2.31	Obesity	Reduced BMI Z-Score	-0.03
Katia Sayuri Ogi	1	0013493645C	F	1994-09-09	2003-05-28	8.71872	2003-10-22	9.11895	Between 5 and 13	109	39.6	1.31	23.0756	16.1	Between 2SD and 3SD	2.35	Obesity	2004-03-24	154	0.421918	< 3 years	< 1 year	9.5411	114	39	1.33	22.0476	16.3	Between 2SD and 3SD	1.99	Overweight	Reduced BMI Z-Score	-0.36
Matheus Ian Trajano	1	0006140996F	M	1998-06-01	2008-03-06	9.7637	2008-03-06	9.7637	Between 5 and 13	117	45.3	1.41	22.7856	16.3	Between 2SD and 3SD	2.43	Obesity	2008-05-28	83	0.227397	< 3 years	< 1 year	9.99064	120	41.5	1.42	20.5812	16.4	Between 1SD and 2SD	1.76	Overweight	Reduced BMI Z-Score	-0.67
Rai Figueredo Da Silva Costa	1	0006172856E	M	2001-10-19	2010-11-10	9.05868	2010-11-10	9.05868	Between 5 and 13	109	41.9	1.38	22.0017	16.1	Between 2SD and 3SD	2.43	Obesity	2013-05-08	910	2.49315	< 3 years	> 1 year	11.5532	139	48.5	1.5	21.5556	17.3	Between 1SD and 2SD	1.61	Overweight	Reduced BMI Z-Score	-0.82
Fabio Henrique Correia De Oliveira	1	0003159240F	M	1996-07-25	2003-01-29	6.51096	2003-03-26	6.66941	Between 5 and 13	80	28	1.18	20.1092	15.4	Between 2SD and 3SD	2.56	Obesity	2005-03-30	735	2.0137	< 3 years	> 1 year	8.68037	104	39.3	1.34	21.8868	15.9	Between 2SD and 3SD	2.53	Obesity	Reduced BMI Z-Score	-0.03
Kaua Da Costa Lima	1	0003274616J	M	1999-01-13	2005-08-17	6.59429	2006-03-08	7.15297	Between 5 and 13	86	31	1.23	20.4904	15.5	Between 2SD and 3SD	2.56	Obesity	2008-03-19	742	2.03288	< 3 years	> 1 year	9.18311	110	33.9	1.32	19.4559	16.1	Between 1SD and 2SD	1.6	Overweight	Reduced BMI Z-Score	-0.96
Victor Hugo Da Silva	1	0006087878F	M	1997-01-27	2004-04-18	7.22534	2004-12-08	7.86461	Between 5 and 13	94	33.5	1.22	22.5074	15.7	Between 2SD and 3SD	2.98	Obesity	2008-11-05	1428	3.91233	> 3 years	> 1 year	11.7731	141	53	1.42	26.2845	17.4	Between 2SD and 3SD	2.56	Obesity	Reduced BMI Z-Score	-0.42
Rebecca Rubinsztejen Guedes	1	6132821J	F	2007-02-11	2012-08-29	5.54932	2012-12-19	5.85525	Between 5 and 13	70	35	1.23	23.1344	15.3	Greater than 3SD	3.41	Obesity	2013-08-14	238	0.652055	< 3 years	< 1 year	6.50822	78	39	1.26	24.5654	15.3	Greater than 3SD	3.6	Obesity	Increased BMI Z-Score	0.19

## Sheet: CONTROLE
		Parâmetros de pesquisa
		Idade de referência (apenas números inteiros)
		Mínimo	5	anos
		Máximo	13	anos

## Sheet: RESULTS 2nd PHASE
Whole Sample										Treatment less than 3 years (N=61)										Treatment more than 3 years (N=32)										Treatment less than 1 year (N=26)
Height Z score - beginning of treatment	Height Z score - end of treatment	BMI Z score - beginning of treatment	BMI Z score - end of treatment		Heigh					Height Z score - beginning of treatment	Height Z score - end of treatment	BMI Z score - beginning of treatment	BMI Z score - end of treatment		Heigh					Height Z score - beginning of treatment	Height Z score - end of treatment	BMI Z score - beginning of treatment	BMI Z score - end of treatment		Heigh					Height Z score - beginning of treatment	Height Z score - end of treatment	BMI Z score - beginning of treatment	BMI Z score - end of treatment		Heigh
0.83	0.47	-1.77	-2.5		Average Z-Score - Beginning of treatment		0.18914			-1.13	-1.21	1.85	1.95		Average Z-Score - Beginning of treatment		0.340984			-2.34	-1.63	-0.61	-0.12		Average Z-Score - Beginning of treatment		-0.100312			0.17	0.33	1.57	1.19		Average Z-Score - Beginning of treatment		0.275769
0.81	0.62	0.82	1.93		Average Z-Score - End of treatment		0.248387			0.17	0.33	1.57	1.19		Average Z-Score - End of treatment		0.428525			-0.26	-0.06	0.82	-0.08		Average Z-Score - End of treatment		-0.095			1.11	1.56	0.5	0.26		Average Z-Score - End of treatment		0.359615
0.43	0.42	0.13	-0.72		Student t test		0.298082			0.81	0.45	0.83	1.02		Student t test		0.106644			0.76	1.32	-0.01	-1.65		Student t test		0.967728			2.03	1.83	0.35	-0.07		Student t test		0.0679589
0.32	-0.14	-0.03	-0.09							1.73	2.07	1.79	2.3							0.83	0.47	-1.77	-2.5							-0.33	-0.49	2.35	1.98
-0.9	0.13	0.98	0.72		Median Z-Score - Beginning of treatment		0.24			1.11	1.56	0.5	0.26		Median Z-Score - Beginning of treatment		0.35			0.43	0.42	0.13	-0.72		Median Z-Score - Beginning of treatment		0.015			0.2	0.21	0.93	1.13		Median Z-Score - Beginning of treatment		0.415
-1.13	-1.21	1.85	1.95		Median Z-Score - End of treatment		0.33			1.04	0.59	-0.31	-1.52		Median Z-Score - End of treatment		0.43			-0.76	-0.6	1.8	0.4		Median Z-Score - End of treatment		0.04			1.75	1.51	3.41	3.6		Median Z-Score - End of treatment		0.615
0.17	0.33	1.57	1.19							-0.99	-0.09	0.01	-0.9							1.01	1.53	-0.81	-1.44							1.85	1.75	0.72	0.91
-0.59	-0.5	1	1.16							0.24	-0.01	-0.68	-0.08							0.11	-0.42	1.99	0.58							0.55	1.01	-0.23	-0.12
-0.76	-0.6	1.8	0.4		BMI					2.03	1.83	0.35	-0.07		BMI					-1.16	-0.3	-0.34	-0.72		BMI					-1.29	-1.32	1.01	0.96		BMI
1.01	1.53	-0.81	-1.44		Average Z-Score - Beginning of treatment		0.695054			-0.33	-0.49	2.35	1.98		Average Z-Score - Beginning of treatment		0.847377			-1.69	-2.82	-0.61	-1.35		Average Z-Score - Beginning of treatment		0.404687			-0.07	-0.1	0.1	-0.82		Average Z-Score - Beginning of treatment		0.985385
0.84	1.96	1.03	-0.54		Average Z-Score - End of treatment		0.304731			1	0.74	0.66	0.6		Average Z-Score - End of treatment		0.574918			-2.07	-2.48	-0.67	-1.42		Average Z-Score - End of treatment		-0.210312			1.82	1.9	0.63	0.1		Average Z-Score - End of treatment		0.746538
0.81	0.45	0.83	1.02		Student t test		5.74001e-06			0.2	0.21	0.93	1.13		Student t test		0.000896258			1.25	1.11	1.53	0.6		Student t test		0.00163406			2.88	2.77	1.22	1.07		Student t test		0.00158881
1.73	2.07	1.79	2.3							0.24	0.31	1.32	1.42							-1.91	-2.61	-0.34	-0.82							-1.92	-1.7	-0.55	-0.44
1.85	1.75	0.72	0.91		Median Z-Score - Beginning of treatment		0.71			-0.84	-0.54	-0.32	-1.09		Median Z-Score - Beginning of treatment		0.82			0.71	1.61	0.17	0.49		Median Z-Score - Beginning of treatment		0.51			0.07	0.57	-1.42	-1.18		Median Z-Score - Beginning of treatment		0.825
0.05	0.06	-0.35	-2		Median Z-Score - End of treatment		0.37			1.75	1.51	3.41	3.6		Median Z-Score - End of treatment		0.66			1.02	0.26	-0.8	-1.75		Median Z-Score - End of treatment		-0.1			0.03	0.04	0.39	-0.11		Median Z-Score - End of treatment		0.785
0.55	1.01	-0.23	-0.12							1.34	1.51	1.74	1.95							0.74	1.41	0.63	1.28							0.46	0.96	0.71	0.66
-1.29	-1.32	1.01	0.96							1.38	1.8	-0.2	-0.2							-0.5	-0.93	0.82	-0.35							0.87	0.73	0.68	-0.15
1.11	1.56	0.5	0.26							0.81	0.62	0.82	1.93							0.66	1	1.66	1.47							0.72	0.66	2.43	1.76
-0.07	-0.1	0.1	-0.82							0.32	-0.14	-0.03	-0.09							1.46	2.01	1.01	1.13							1.33	1.45	1.85	1.58
-0.35	0.54	2.56	2.53							-0.9	0.13	0.98	0.72							1.92	0.7	-1.17	1.41							0.8	0.69	1.97	1.81
0.11	-0.42	1.99	0.58							-0.59	-0.5	1	1.16							-0.3	0.03	1.12	-0.48							-1.51	-1.39	1.02	0.25
-0.32	-0.17	0.27	0.41							0.84	1.96	1.03	-0.54							2.15	1.78	1.71	-2.13							-1.01	-1	1.48	1.48
1.82	1.9	0.63	0.1							1.85	1.75	0.72	0.91							0.04	0.58	-1.55	-1.08							-1	-0.93	2	2.03
1.04	0.59	-0.31	-1.52							0.05	0.06	-0.35	-2							-2.42	-1.11	-0.78	-1.43							0.44	0.42	0.39	-0.22
-1.16	-0.3	-0.34	-0.72							0.55	1.01	-0.23	-0.12							-1.05	-1	0.39	0.37							-3.17	-2.8	0.52	0.51
1.23	0.53	-0.41	-0.84							-1.29	-1.32	1.01	0.96							-0.01	0.87	1.63	0.25							0.39	0.69	1.59	1.24
-1.69	-2.82	-0.61	-1.35							-0.07	-0.1	0.1	-0.82							-0.98	-1	1.05	0.5
-0.99	-0.09	0.01	-0.9							-0.35	0.54	2.56	2.53							0.51	-1.49	1.71	0.68
-2.07	-2.48	-0.67	-1.42							-0.32	-0.17	0.27	0.41							-0.04	0.22	0.68	0.14
-2.34	-1.63	-0.61	-0.12							1.82	1.9	0.63	0.1							-0.78	-0.79	2.98	2.56
-0.49	-0.36	-0.87	-2.81							1.23	0.53	-0.41	-0.84							-1.71	-1.17	1.13	0.35
1.25	1.11	1.53	0.6							-0.49	-0.36	-0.87	-2.81							1.17	0.05	-0.55	-0.9
-1.91	-2.61	-0.34	-0.82							2.88	2.77	1.22	1.07
0.71	1.61	0.17	0.49							-1.64	-1.45	-0.25	-0.11
2.88	2.77	1.22	1.07							-1.92	-1.7	-0.55	-0.44
1.02	0.26	-0.8	-1.75							0.07	0.57	-1.42	-1.18
-1.64	-1.45	-0.25	-0.11							-0.18	-0.26	0.98	1.03
0.74	1.41	0.63	1.28							-1.28	-0.88	-1.01	-1.56
-1.92	-1.7	-0.55	-0.44							1.99	3.12	1.79	-0.47
-0.5	-0.93	0.82	-0.35							0.03	0.04	0.39	-0.11
0.07	0.57	-1.42	-1.18							0.06	-0.24	2.56	1.6
0.66	1	1.66	1.47							0.84	0.85	1.63	1.26
-0.18	-0.26	0.98	1.03							0.46	0.96	0.71	0.66
-1.28	-0.88	-1.01	-1.56							0.87	0.73	0.68	-0.15
1.99	3.12	1.79	-0.47							-0.4	0.11	1.83	1.25
0.24	-0.01	-0.68	-0.08							0.72	0.66	2.43	1.76
2.03	1.83	0.35	-0.07							0.9	0.74	0.62	0.74
-0.26	-0.06	0.82	-0.08							1.33	1.45	1.85	1.58
1.46	2.01	1.01	1.13							5.23	5.02	2.34	2.31
0.03	0.04	0.39	-0.11							1.55	0.37	2.12	2.86
-0.33	-0.49	2.35	1.98							0.8	0.69	1.97	1.81
0.06	-0.24	2.56	1.6							0.83	0.51	2.43	1.61
1.92	0.7	-1.17	1.41							-1.51	-1.39	1.02	0.25
0.84	0.85	1.63	1.26							-1.01	-1	1.48	1.48
-0.3	0.03	1.12	-0.48							-1	-0.93	2	2.03
0.46	0.96	0.71	0.66							0.44	0.42	0.39	-0.22
2.15	1.78	1.71	-2.13							0.35	1.01	0.49	0.48
0.04	0.58	-1.55	-1.08							-0.67	-0.83	-0.99	-0.76
0.87	0.73	0.68	-0.15							-3.17	-2.8	0.52	0.51
-2.42	-1.11	-0.78	-1.43							0.39	0.69	1.59	1.24
1	0.74	0.66	0.6							0.63	0.43	-0.16	-0.5
-0.4	0.11	1.83	1.25
0.72	0.66	2.43	1.76
0.2	0.21	0.93	1.13
0.24	0.31	1.32	1.42
-0.84	-0.54	-0.32	-1.09
0.9	0.74	0.62	0.74
-1.05	-1	0.39	0.37
1.33	1.45	1.85	1.58
5.23	5.02	2.34	2.31
1.55	0.37	2.12	2.86
-0.01	0.87	1.63	0.25
0.8	0.69	1.97	1.81
0.83	0.51	2.43	1.61
1.75	1.51	3.41	3.6
-1.51	-1.39	1.02	0.25
-0.98	-1	1.05	0.5
0.51	-1.49	1.71	0.68
-1.01	-1	1.48	1.48
-1	-0.93	2	2.03
0.44	0.42	0.39	-0.22
1.34	1.51	1.74	1.95
1.38	1.8	-0.2	-0.2
0.35	1.01	0.49	0.48
-0.04	0.22	0.68	0.14
0.76	1.32	-0.01	-1.65
-0.78	-0.79	2.98	2.56
-0.67	-0.83	-0.99	-0.76
-1.71	-1.17	1.13	0.35
-3.17	-2.8	0.52	0.51
1.17	0.05	-0.55	-0.9
0.39	0.69	1.59	1.24
0.63	0.43	-0.16	-0.5

## Sheet: Análise AnthroPlus final tto ab
RGHC	BAZ
0006087466E	-2.5
0006148511K	1.93
0006106607E	-0.72
0006086204E	-0.09
0013650420C	0.72
0006111751K	1.95
0003294670H	1.19
0006172858C	1.16
0006080885H	0.4
0006091476D	-1.44
0006107672F	-0.54
0006126392E	1.02
0006099183I	2.3
0006113713K	0.91
0006080881A	-2
6171284E	-0.12
33513703J	0.96
N/I1	0.26
0006170906D	-0.82
0003159240F	2.53
0006145310B	0.58
0006081675C	0.41
6196979D	0.1
0003192563G	-1.52
0006142422H	-0.72
0006107837E	-0.84
0006106209H	-1.35
0006182558I	-0.9
0006149942B	-1.42
0006101069A	-0.12
6113417H	-2.81
0006102274A	0.6
0006149940D	-0.82
13807084K	0.49
14047401B	1.07
0006081349I	-1.75
33513704I	-0.11
0013455119I	1.28
0013846862A	-0.44
0006089145C	-0.35
6163334A	-1.18
0003275892J	1.47
6110667K	1.03
0006086360I	-1.56
0006133083F	-0.47
6182954H	-0.08
6170056C	-0.07
13847842B	-0.08
13594761G	1.13
0006185510C	-0.11
0013493645C	1.99
0003274616J	1.6
0006087040K	1.41
0006101480J	1.26
0006111749F	-0.48
6069041A	0.66
0006104044H	-2.13
0006082765H	-1.08
0006132852K	-0.15
0006086060J	-1.43
6178474I	0.6
0006161586H	1.25
0006140996F	1.76
0006140401C	1.13
0003361592H	1.42
0013459546K	-1.09
0006120225B	0.74
0006084130C	0.37
13897250F	1.58
0006061769J	2.31
0006126168E	2.86
12510987K	0.25
0006181938D	1.81
0006172856E	1.61
6132821J	3.6
N/I2	0.25
0006087876H	0.5
0006118831K	0.68
0013475959H	1.48
0003331116G	2.03
0006133082G	-0.22
13922936E	1.95
0003366486H	-0.2
0006125706F	0.48
0006129426C	0.14
0006101402J	-1.65
0006087878F	2.56
6174360G	-0.76
N/I3	0.35
0006087732F	0.51
0006161784B	-0.9
0006172848F	1.24
0006083018J	-0.5

## Sheet: Análise AnthroPlus início tto a
RGHC	BAZ
0006087466E	-1.77
0006148511K	0.82
0006106607E	0.13
0006086204E	-0.03
0013650420C	0.98
0006111751K	1.85
0003294670H	1.57
0006172858C	1
0006080885H	1.8
0006091476D	-0.81
0006107672F	1.03
0006126392E	0.83
0006099183I	1.79
0006113713K	0.72
0006080881A	-0.35
6171284E	-0.23
33513703J	1.01
N/I1	0.5
0006170906D	0.1
0003159240F	2.56
0006145310B	1.99
0006081675C	0.27
6196979D	0.63
0003192563G	-0.31
0006142422H	-0.34
0006107837E	-0.41
0006106209H	-0.61
0006182558I	0.01
0006149942B	-0.67
0006101069A	-0.61
6113417H	-0.87
0006102274A	1.53
0006149940D	-0.34
13807084K	0.17
14047401B	1.22
0006081349I	-0.8
33513704I	-0.25
0013455119I	0.63
0013846862A	-0.55
0006089145C	0.82
6163334A	-1.42
0003275892J	1.66
6110667K	0.98
0006086360I	-1.01
0006133083F	1.79
6182954H	-0.68
6170056C	0.35
13847842B	0.82
13594761G	1.01
0006185510C	0.39
0013493645C	2.35
0003274616J	2.56
0006087040K	-1.17
0006101480J	1.63
0006111749F	1.12
6069041A	0.71
0006104044H	1.71
0006082765H	-1.55
0006132852K	0.68
0006086060J	-0.78
6178474I	0.66
0006161586H	1.83
0006140996F	2.43
0006140401C	0.93
0003361592H	1.32
0013459546K	-0.32
0006120225B	0.62
0006084130C	0.39
13897250F	1.85
0006061769J	2.34
0006126168E	2.12
12510987K	1.63
0006181938D	1.97
0006172856E	2.43
6132821J	3.41
N/I2	1.02
0006087876H	1.05
0006118831K	1.71
0013475959H	1.48
0003331116G	2
0006133082G	0.39
13922936E	1.74
0003366486H	-0.2
0006125706F	0.49
0006129426C	0.68
0006101402J	-0.01
0006087878F	2.98
6174360G	-0.99
N/I3	1.13
0006087732F	0.52
0006161784B	-0.55
0006172848F	1.59
0006083018J	-0.16

## Sheet: Pendências Amb Obesidade
	Nome		RGHC				IMC		SNAP Família: desatenção	SNAP Família: hiperatividade e impulsividade	SNAP Família: total					Nome da mãe	Telefone	Data Retorno	Observações
24	André Luís Schettini Sousa		6166754H				28.7		0	1	1					Mãe: Maria	5612-7936	2013-09-06
46	Brunna Oliveira de Jesus		6195243H				33.2		8	1	9					Mãe: Andréa	99316-6165	2013-09-06
45	Bruno Novais de Andrade		6154564G				27.1		0	0	0					Mãe: Renata	5058-4407	2013-09-13
8	Carolina Maria dos Santos Lopes		6190289D				40.2		8	3	11					Mãe: Luana	96097-8763	2013-09-27
25	Danúbia Barbosa da Silva								7	0	7						8062-2940 / 3944-9451	2013-10-04
48	Gabriel Garcia Alves		6182600F				36.8		5	5	10					Mãe: Rosana	98307-1127	2013-10-04
49	Jackline Oliveira da Silva		6186006D				41.2		2	3	5						3942-3145	2013-10-04
30	Jefferson M. Da Silva		6162876E				40.2		7	0	7					Tia avó: Aurea	95282-7362	2013-10-11
28	José Gonçálves Bandeira Neto		6179592G				31.9		6	6	12					Avó: Margaret	98583-8485	2013-10-11
33	Kauã Caetano Soares		6185590A				31.4		4	3	7					Mãe: Eliete	99336-7857	2013-10-11
	Noemi Fernanda Moreira Ladeira		6173084C				40.6		5	6	11					Mãe: Marilza	4771-1214	2013-10-18
	Raissa Cristina Campos		6181210B						7	2	9						6879-4147	2013-10-18
	Rogério Carlos Carneiro		6181020G				29.9		6	5	11					Mãe: Soelia	4759-2334 / 9867-3417	2013-10-18
	Ynara de Oliveira Costa		6180478F				36.3		3	6	9						7425-2844 / 4652-5240	2013-10-25	Já entreguei novo quest para a escola
	Jefferson Albuquerque Souza		6195977K				32.3									Mãe: Josenilda	97035-1052	2013-10-25
	Laila Beatriz T. Rodrigues	F	13929614A														4701-0979	2013-11-01
	Michelli Anália da Silva		6198786B													Pai: Edemilson	96742-8656	2013-11-01
	Leonardo Souza Medeiros		6144854D													Mãe: Priscila	2567-5435/98067-5232	Checar
	Karina Peres Laurindo		6196567C													Mãe: Luzia	96515-0949 / 3917-3009	Checar
	Nichollas Silva Gazaroli		6193869D													Mãe: Edna	3592-5989 / 8767-9881
	Keven Ricardo R. Costa		6136028D														2279-3666		Perdeu seguimento
	Jeferson Cristiano da Silva		6145455C														8974-8772 / 3721-1269		Perdeu seguimento
	Diego Araújo de Sousa		6178272H														2025-2797		Perdeu seguimento
	Retornos por data
	2013-09-06																2013-09-27		2013-10-18
	Rogério Carlos Carneiro																Keven Ricardo R. Costa		Danúbia Barbosa da Silva
	Jackline Oliveira da Silva																		José Gonçálves Bandeira Neto
	Nichollas Silva Gazaroli
																	2013-10-04
	2013-09-13																André Luís Schettini Sousa
	Noemi Fernanda Moreira Ladeira																Kauã Caetano Soares
																	2013-10-11
																	Leonardo Souza Medeiros
																	Karina Peres Laurindo
									4	2	6
									9	8	17
									0	0	0
									1	0	1
									3	3	6
									1	3	4
									6	4	10
									9	2	11
									0	0	0
									8	7	15
									8	6	14
									0	2	2
									3	1	4
									0	0	0
									0	3	3
									0	1	1
									2	1	3
									7	9	16
									2	6	8
									6	4	10
									2	1	3
									0	0	0
									5	3	8
									0	2	2
									1	1	2
									2	1	3
									3	2	5
									6	9	15
									1	2	3
									0	0	0

[truncated: 5 more sheets: Obesos com SNAP pais +, Contatos Pendentes Amb Obesidad, BMI, Z-scores Boys, Z-scores Girls]
